# Supplementary material
Source: Research Square preprint supplement (doi:10.21203/rs.3.rs-9685896/v1)
Supplement: Supplementary file 1 [file 69958ecb8fd20ee49759b742.xlsx]

## Sheet: Table S1
Supplementary Table S1
Common handle sequences used for PCR amplification and DNA looping, and DNA sequences used in AFM and smFRET meaurements
	Common handles used in smFRET
	Common forward handle	TAAATGAAGACAAGTGT
	Common reverse handle	AGCTCTCGGAGTCGGTC
	Cy5-biotin forward handle	Cy5-GATTAGTTGGTTAAATGAAGACAAG[T]GT
	Cy3 reverse handle	Cy3-AACTAATCCGAAGCTCTCGGAGTCGGTC
	T is the biotinylated thymine. The homology sequence is underlined.
	DNA sequences used in AFM measurements
	DNA sequences with/without stifffness periodicity	Sequence	Mean stiffness (kcal·mol–1·rad–2)	GC%
	200 bp random-stiffness DNA	AGGGGATATATTAAAGCCTAAACAGGACAATACCAAATTCAAATCTGGAGGTCAACCTTGGGGCCCGAAAGCGCGGATATTCTTGCATGTCATACTCGCAGGAACTACGCAATCGATAAGTACCCTTGCATGGTCGAGCGATAGCTTTCTAATCTCGCCTAGAATCGTATAGAGAACATAGTCCTTCGCGATAAGCACAT	40.038	45
	200 bp periodic-stiffness DNA	ACTGGGGAGAACCTAGGGATTCCCGGGGAGAACCAGTGATTTCCTAGGGGAAACATGTGTTTCTACACTATTTCCGTACTAAAACAGTGGTTCTCCTGGGTCTTCCTGGTGATTCCCCCGGGTTTCTACAGTAAAACCCACAGAAATGCATGGTTTCTATAGGGAAATGTGTAGTTTCTGTACCAAAACATGGTATTTCA	40.09	45
	800 bp random-stiffness DNA	ATCTGTGATAAAGAAATGAGGTCGACACTCTCCATAAGAACCTATGTAAACTGGAGGGGTATATATTTGAAACAGCCAATCGATCGGCATCCGTGCAGCGTACCTCGATTAATGACTATGACGTACATCGGCCTCCAGAACCCTGAAAACTGAGTAGGGTGTCACCCCCATCTGCGATAGCATTAGATACATCAAACGGGTATTTAGGAGAGGCAAGACTAGTAATAGAGCTATCATGGTTCTATTCTGGTCGCCTCGTAACGCAATTAAGCAAACAGATCTTGACACGCTGACCAAGAGATGGGTGAAAGTCTCCGAAGGCCCAGCCCCTCACTCCGTGAGCAAATTAGATCCTTCCGGTTAACTTCGAGAATACTTAGTGTACGCATTAAGCCCTTC…	40.08	45
	800 bp periodic-stiffness DNA	ACCCAGGAAGTCCCTGGGTTTCCTGTATAAATCATAGGGAAATGGGGTGTTTCCATGCATTTCCCGCAGGTTTCCTAGGGGTTTCACAGTGAAATACTGGGATTCCTACATAAAACCCGTATCTTCCCGGGGGAAATATGTGGAAACCTATACTTTCTGGTGGTTTCCCCGGGGTTTTGTACTAGAAATGCACTATTTCCCAGTGATTTAGTGTGAAATCTGGGGGTTTCCTGGGTAAAATGTGTGCTTTCCAGGTATTTTATACGGTTTTCATGTACTTTCCGGGGGGAAACTAGGGGTTTCACCACGTTTTACTATGTTTCGGGTGGGATTCCTGGGTGAAATACGGTAATTCTGTGCGTTTTGGTGTATTTCTAGTGTGAATTATACAGAAAACAC…	40.32	45.1
	800 bp periodic-stiffness DNA + 5-bp shift	ACCCAGGAAGTCCCTGGGTTTCCTGTATAAATCATAGGGAAATGGGGTGTTTCCATGCATTTCCCGCAGGTTTCCTAGGGGTTTCACAGTGAAATACTGGGATTCCTACATAAAACCCGTATCTTCCCGGGGGAAATATGTGGAAACCTATACTTTCTGGTGGTTTCCCCGGGGTTTTGTACTAGAAATGCACTATTTCCCAGTGATTTAGTGTGAAATCTGGGGGTTTCCTGGGTAAAATGTGTGCTTTCCAGGTATTTTATACGGTTTTCATGTACTTTCCGGGGGGAAACTAGGGGTTTCACCACGTTTTACTATGTTTCGGGTGGGATTCCTGGGTGAAATACGGTAATTCTGTGCGTTTTGGTGTATTTCTAGTGTGAATTATACAGAAAACAC…	40.37	45.3
	400-bp ACRO_Composites found in human centromeres	Sequence	Mean stiffness (kcal·mol–1·rad–2)	GC%
	400 bp random-stiffness DNA	TATAATTGAAATTCAGCACCTCGCGCGGAAATGGAGGGTCGGTCTTATTTGTCCCAACTGGGTAACCCGGCCTATACGCGTGACCTGTATCTGGCAGGAATTACTTCTTACAAGACTTTCACGTGTAGGCCCCGGCCATCGGCCGAGAGTGATTTCCCCTTGGTATCAGCAGCAATCCAGTAGGCCCCCGTGGAAACGATTCGGTCGACCGACCCGGAGCGGACTGCGAGAAATAGACCTCCAATGCATCATTCTTCGTCCCTAACTTGACCGTCAAGCCGAGCCGAGCTGCGGTGCGTCAACGCGTCCGCTTTTGGGCATGTTTGGCATAGCAAGTGGTAAGATCATTGGCCGCGTGTGAACTTATCGCTTGGAGCGTGGTTGTGCACGCATGGACCGT	38.8	54.8
	400 bp ACRO_Composite 3_4	GGTGAAATCTGGAGATGGTTGGAGAGTAGCTGAGAGAGACAGAAGAGTCCCTGAGGGCTGGGGGTGAGAACATGAGGGAGACGGGGGAGTAAGTCAGTGAAATTCGTGAGTTCGGTGGTGTATCGTGGGTGCCTGGAACTGACTCCAGCTGGAATCTAGAGAAGTTTTGAGAGTAGCTGAAGGAGACACAAGAGTCCCTGTGGGCTGAGGGCAAAGACCTGAGAGAGACCAGGGAGGACCTCAGTGAAGTCTGTGAGTCTGTAGGTGATTCCGGAGTGTGGGAGGCTGACTCCCGCTGAAATCTGGGCGTGGTGGGAGAGTAGCTGGGACAGACAGGAGAGTCCCAGGGGGCTGGGGGTGAAGACATGAGAGAGACTGGGGAGTAACTCAGTGAAATTGC	39.2	55.3
	400 bp ACRO_Composite 15_1	ATGTCATTGTGTTCTCCCGTGTCCTCCTCTGGAGATTCCTCACAGTCACCCCATTCATCAATAATATACCATGTGTTCTTACTGCCATCATCCAGCAGCTCACCCCCAGCCACCAATGACTCTCCTGTCTGTCCCAGCTACTCTCCAACTACGCCCAGATTTCAGCGGGCGTCGGTATCCAACACCCCAGAAACACCTACAAACTCACAGACCTCAGTGAGATCCTCGCCAGTCTCTCTCACGTCTTCACCCCCAGGCCTTACGGACCCTCCAGTCTCTCCCAGCTACTATCCAACCACGCGCACATTTCAGCGCGGGTCAGATCCAGGAACCCAGGGATCACCAGCAAGCCCACCACTTTCACTGTGTTACTCCCCAGTCTCAAGCACGTCTTTATCTC	37.8	55.3
	DNA sequences used in smFRET mesurements
	DNAs with/without stiffness periodicity with varying lengths	Sequence	Mean stiffness (kcal·mol–1·rad–2)	GC%
	100 bp random-stiffness DNA V1	CTGTTCCTATCGCTCTAGTCTCGGAAGGAAAGTAAGGGACGACGTTGCTGACCGAAAGGTTTGAATCTGTTATTCGGTGCTAGCTCAGGTGGCACCCGGC	40.001	45
	100 bp random-stiffness DNA V2	GAGTGGCGGCTAGGGCTTCTGAATAATAGAATTGTCGTATTAGTACCCTTTAGGCGATATCAGATCTTGGTCCGGGGCGATCTATAAGCGCTATAAGAAA	40.3596	45
	100 bp periodic-stiffness DNA	CCTATACAAAACTACATATTTCCGGGGGGAAAGTGTGTAAATTGCCACGATTCCTGTAGTTTTCGTAGTATTTCTATAGGTTCTCGTGGGTCTTCCCGGG	39.92	44
	100 bp periodic-stiffness DNA + 5-bp shift	CCTATACAAAACTACATATTTCCGGGGGGAAAGTGTGTAAATTGCCACGAGATCGTTCCTGTAGTTTTCGTAGTATTTCTATAGGTTCTCGTGGGTCTTC	40.58	42
	200 bp random-stiffness DNA V1	AGGGGATATATTAAAGCCTAAACAGGACAATACCAAATTCAAATCTGGAGGTCAACCTTGGGGCCCGAAAGCGCGGATATTCTTGCATGTCATACTCGCAGGAACTACGCAATCGATAAGTACCCTTGCATGGTCGAGCGATAGCTTTCTAATCTCGCCTAGAATCGTATAGAGAACATAGTCCTTCGCGATAAGCACAT	40.3681	45
	200 bp random-stiffness DNA V2	TCCCTTATTTGGGTAGGACAGAGTCATCCCTTCAGAATAGACAGGGCAGCATTAATCAGCTGTGATGAATCGCTTGTAGTCTTATTCAATCACGAAGAGCCGCTCGACGCCGGGCCTAGTTGGTCAGATATACGCGATGTTGCCCAAGGATTCTGAAAGAGTCTTGGTGAAGTCATAATACATTAAAGTTATTGTCACAC	40.0104	45
	200 bp random-stiffness DNA V3	ACGGCAATAGATGGTTTGGTTCGATGCGCATCCACAAGTTCGGAGAAGAATCTCGTCTCTCGAAGGAATAAACAATGACAGATGCAGACTATTATACTTAATTGTCAGCATAGCGTGGTAAACGGCATTCATCTTCCGAAGTTCTTGCGTGACCAATGAACGGTCAAATCTAAACCGACACGACCCACATCTCGACTGCT	40.7811	45
	200 bp random-stiffness DNA V4	GTGATAATTCGAGATAATTCTCGTACAGATCGCTAATCGTTGGCGCCTCTGTTAGACAAATGGGGTAACTTGCCGGATAACCTTATGGACTTCATCTTAGAGGGAGTAAATAGAATATTCCCTGCGAGTATAAGGACTAGGTGAACGCTCTCATGTCCGCCCAGAATTGTACGCGAATCCGGTAAATTACCGGGCCTTAA	40.464	45
	200 bp random-stiffness DNA V5	CCAATCGTATCCATGTAACACAACTAAGTTGAACCCGCACAGGATTCCGTCCATTTAACATACCCGCTACCTTTTGGGGTAAGCCCGCAAGGCGGGTTTTCACTTTTTGGGATCGTGTTAGACTTGTTAGCGAGTCGCATCGAGGAATGCCAATATGAGATTTGAAGTAGACCGGTAGTTTATTCTATGGTTTGTAAGGT	40.038	45
	200 bp periodic-stiffness DNA	ACTGGGGAGAACCTAGGGATTCCCGGGGAGAACCAGTGATTTCCTAGGGGAAACATGTGTTTCTACACTATTTCCGTACTAAAACAGTGGTTCTCCTGGGTCTTCCTGGTGATTCCCCCGGGTTTCTACAGTAAAACCCACAGAAATGCATGGTTTCTATAGGGAAATGTGTAGTTTCTGTACCAAAACATGGTATTTCA	40.089	45
	200 bp periodic-stiffness DNA + 5-bp shift	ACTGGGGAGAACCTAGGGATTCCCGGGGAGAACCAGTGATTTCCTAGGGGAAACATGTGTTTCTACACTATTTCCGTACTAAAACAGTGGTTCTCCTGGGGATCGTCTTCCTGGTGATTCCCCCGGGTTTCTACAGTAAAACCCACAGAAATGCATGGTTTCTATAGGGAAATGTGTAGTTTCTGTACCAAAACATGGTA	39.91	45
	400 bp random-stiffness DNA	TTCGTACCCCGTAAGACACTTCGGCTCCCTGAACGCGTAGCGCCTGGAGACAGTAACTACAACCCCCCGCGGGCGAAGTCAGATTGCTATGCGCTTCCCAAAGAAGATGTATCGAAACCTTACTATACTCGTGTCGACGCGTGGTCGCAGTACTGGAAAATTTTGTGACAGTTTATCCTGGATCTACGTGGCCGGGTTAGCGACGACGGTTAATGTAGCTATAGTTTTCGACTCTGAACGCTTACAAGAGGTGTAGGTGTCAACTCACTTAAATAACCATATCCATTTAGTTTACAGCCGTAAAATCGGTTTCAGAAGAATTGAAGCTTGGGACACCCAATGATTAGAAGACCCTACCTTAGAGAACAAATGGTTTATCCCAGCGGATCAAGCTTAGATT	40.1	46.5
	400 bp periodic-stiffness DNA	ATGTAGTATTTCCACGGCTTTCTATGGGTTTCCTAGTGGAAACTACGTGTTTCTATAGTGAAATAGTACGTTTTACTGGGTCTTTACAGTATTTTGTGGCAATTCCCCATGTTTCTGGTAGGATTTAGTGCATTTCCCAGTAAGAACCGCGGGGAATTGTGGGTTTTAGTGTGCTTTCCTACGGAATCCCTGGGTTTTCTGTGCTAAAACACGGTAATTTACAGGGCTTCCTGGGGGAATCTACAGCTTTCTAGGGGTTTCCTGCGGGAAATGCGTGGAAAGTATAGTAAAACGTGCATTTTACCCAGGTTTCTACGGTAAAAGTATGGGAATTACAGTAGAAACTGTGCGTTTCTGTAGTAAAACTGGGGGAATTAGTGGGATTTATACTAGAAATGCG	40.445	42.3
	400 bp periodic-stiffness DNA + 5-bp shift	ATGTAGTATTTCCACGGCTTTCTATGGGTTTCCTAGTGGAAACTACGTGTTTCTATAGTGAAATAGTACGTTTTACTGGGTCTTTACAGTATTTTGTGGCAATTCCCCATGTTTCTGGTAGGATTTAGTGCATTTCCCAGTAAGAACCGCGGGGAATTGTGGGTTTTAGTGTGCTTTCCTACGGAATCCCTGGGTTTTCTGATCGGTGCTAAAACACGGTAATTTACAGGGCTTCCTGGGGGAATCTACAGCTTTCTAGGGGTTTCCTGCGGGAAATGCGTGGAAAGTATAGTAAAACGTGCATTTTACCCAGGTTTCTACGGTAAAAGTATGGGAATTACAGTAGAAACTGTGCGTTTCTGTAGTAAAACTGGGGGAATTAGTGGGATTTATACTAGAA	40.501	42.3
	800 bp random-stiffness DNA	ATCTGTGATAAAGAAATGAGGTCGACACTCTCCATAAGAACCTATGTAAACTGGAGGGGTATATATTTGAAACAGCCAATCGATCGGCATCCGTGCAGCGTACCTCGATTAATGACTATGACGTACATCGGCCTCCAGAACCCTGAAAACTGAGTAGGGTGTCACCCCCATCTGCGATAGCATTAGATACATCAAACGGGTATTTAGGAGAGGCAAGACTAGTAATAGAGCTATCATGGTTCTATTCTGGTCGCCTCGTAACGCAATTAAGCAAACAGATCTTGACACGCTGACCAAGAGATGGGTGAAAGTCTCCGAAGGCCCAGCCCCTCACTCCGTGAGCAAATTAGATCCTTCCGGTTAACTTCGAGAATACTTAGTGTACGCATTAAGCCCTTC…	40.08	45
	800 bp periodic-stiffness DNA	ACCCAGGAAGTCCCTGGGTTTCCTGTATAAATCATAGGGAAATGGGGTGTTTCCATGCATTTCCCGCAGGTTTCCTAGGGGTTTCACAGTGAAATACTGGGATTCCTACATAAAACCCGTATCTTCCCGGGGGAAATATGTGGAAACCTATACTTTCTGGTGGTTTCCCCGGGGTTTTGTACTAGAAATGCACTATTTCCCAGTGATTTAGTGTGAAATCTGGGGGTTTCCTGGGTAAAATGTGTGCTTTCCAGGTATTTTATACGGTTTTCATGTACTTTCCGGGGGGAAACTAGGGGTTTCACCACGTTTTACTATGTTTCGGGTGGGATTCCTGGGTGAAATACGGTAATTCTGTGCGTTTTGGTGTATTTCTAGTGTGAATTATACAGAAAACAC…	40.32	45.1
	800 bp periodic-stiffness DNA + 5-bp shift	ACCCAGGAAGTCCCTGGGTTTCCTGTATAAATCATAGGGAAATGGGGTGTTTCCATGCATTTCCCGCAGGTTTCCTAGGGGTTTCACAGTGAAATACTGGGATTCCTACATAAAACCCGTATCTTCCCGGGGGAAATATGTGGAAACCTATACTTTCTGGTGGTTTCCCCGGGGTTTTGTACTAGAAATGCACTATTTCCCAGTGATTTAGTGTGAAATCTGGGGGTTTCCTGGGTAAAATGTGTGCTTTCCAGGTATTTTATACGGTTTTCATGTACTTTCCGGGGGGAAACTAGGGGTTTCACCACGTTTTACTATGTTTCGGGTGGGATTCCTGGGTGAAATACGGTAATTCTGTGCGTTTTGGTGTATTTCTAGTGTGAATTATACAGAAAACAC…	40.37	45.3
	200-bp DNAs with random stiffness with varying mean stiffness	Sequence	Mean stiffness (kcal·mol–1·rad–2)	GC%
	200 bp random-stiffness DNA 40s V1	AGGGGATATATTAAAGCCTAAACAGGACAATACCAAATTCAAATCTGGAGGTCAACCTTGGGGCCCGAAAGCGCGGATATTCTTGCATGTCATACTCGCAGGAACTACGCAATCGATAAGTACCCTTGCATGGTCGAGCGATAGCTTTCTAATCTCGCCTAGAATCGTATAGAGAACATAGTCCTTCGCGATAAGCACAT	40.3681	45
	200 bp random-stiffness DNA 40s V2	TCCCTTATTTGGGTAGGACAGAGTCATCCCTTCAGAATAGACAGGGCAGCATTAATCAGCTGTGATGAATCGCTTGTAGTCTTATTCAATCACGAAGAGCCGCTCGACGCCGGGCCTAGTTGGTCAGATATACGCGATGTTGCCCAAGGATTCTGAAAGAGTCTTGGTGAAGTCATAATACATTAAAGTTATTGTCACAC	40.0104	45
	200 bp random-stiffness DNA 40s V3	ACGGCAATAGATGGTTTGGTTCGATGCGCATCCACAAGTTCGGAGAAGAATCTCGTCTCTCGAAGGAATAAACAATGACAGATGCAGACTATTATACTTAATTGTCAGCATAGCGTGGTAAACGGCATTCATCTTCCGAAGTTCTTGCGTGACCAATGAACGGTCAAATCTAAACCGACACGACCCACATCTCGACTGCT	40.7811	45
	200 bp random-stiffness DNA 40s V4	GTGATAATTCGAGATAATTCTCGTACAGATCGCTAATCGTTGGCGCCTCTGTTAGACAAATGGGGTAACTTGCCGGATAACCTTATGGACTTCATCTTAGAGGGAGTAAATAGAATATTCCCTGCGAGTATAAGGACTAGGTGAACGCTCTCATGTCCGCCCAGAATTGTACGCGAATCCGGTAAATTACCGGGCCTTAA	40.464	45
	200 bp random-stiffness DNA 40s V5	CCAATCGTATCCATGTAACACAACTAAGTTGAACCCGCACAGGATTCCGTCCATTTAACATACCCGCTACCTTTTGGGGTAAGCCCGCAAGGCGGGTTTTCACTTTTTGGGATCGTGTTAGACTTGTTAGCGAGTCGCATCGAGGAATGCCAATATGAGATTTGAAGTAGACCGGTAGTTTATTCTATGGTTTGTAAGGT	40.038	45
	200 bp random-stiffness DNA 36s	TCTCACTATATATACCGCTTGGACACCCAATGCCTCTGATCGTAAGTCACTGCTCGGTTAGTACATAATTCACAACGCTGGTGAACTTATGGCAGGTCATCTGCTGTTACGATACTACGATGCCATGGGGATATGGAAGTATACTGGTATGTACGTGGGCGTACAGATAAACCTGGAGATTTGTAGAGATGCCATATTGG	36.03	45
	200 bp random-stiffness DNA 44s	AAAGCATTTCACTCGATCTCATAGCTTTAAAAGGGAACTCCCATCAACGAAGCCTTCTAATCGTTCGCTCCATAGTTGCCTCTTGAAGAGACCACCCGACCCCTCGGCCTCGCGTTGACGCGCAAGGACGAATCTCAAGGAAAAAGAGCATGAGTCTTTCTTAAAGCTAAATTCAAATGATTAAGATCAGGTTTGGATTC	44.25	45
	200-bp DNAs with/without stiffness periodicity with varying GC%	Sequence	Mean stiffness (kcal·mol–1·rad–2)	GC%
	200 bp random-stiffness DNA 38 GC%	ATCTGAGACCTTAGAAATTATCGCTCAAATCGTAGTGAAGATCACACATATTGTTTTTTACAAGCACAACTTATTCCGAAACTACAGTACATTCATATTACGTTCCTTGTACAAAATATGGTGCTACCACATTTGCGGTAGGATTCTGGCGCTAGGTTGATCTGAACCAACGAAAGATATTTGGCACACAATGTAGTCTG	40.018	38
	200 bp periodic-stiffness DNA 38 GC%	GTATGGTAATTCACGTAGTTTCTACGTGAAATCATAGGGTTTTGTACAGTTTCTATACGGAAACCTAGGGTTTCCTAGGGGAATCATGGTATTTCGTACACTTTCCTATAGTTTTCACACCGTTTCTACAGTAAAACATGGGGTTTCTGTGCGATTTACGTAGTTTCCCTGTAGTTTCTGTATAGAAACATACAGAAACA	40.075	38
	200 bp random-stiffness DNA 45 GC%	ACGGCAATAGATGGTTTGGTTCGATGCGCATCCACAAGTTCGGAGAAGAATCTCGTCTCTCGAAGGAATAAACAATGACAGATGCAGACTATTATACTTAATTGTCAGCATAGCGTGGTAAACGGCATTCATCTTCCGAAGTTCTTGCGTGACCAATGAACGGTCAAATCTAAACCGACACGACCCACATCTCGACTGCT	40.038	45
	200 bp periodic-stiffness DNA 45 GC%	ACTGGGGAGAACCTAGGGATTCCCGGGGAGAACCAGTGATTTCCTAGGGGAAACATGTGTTTCTACACTATTTCCGTACTAAAACAGTGGTTCTCCTGGGTCTTCCTGGTGATTCCCCCGGGTTTCTACAGTAAAACCCACAGAAATGCATGGTTTCTATAGGGAAATGTGTAGTTTCTGTACCAAAACATGGTATTTCA	40.089	45
	200 bp random-stiffness DNA 52 GC%	AATTGAAATACTCTTCAGTCGGTTACTTTGAGGACTACACTTTGATCCGTCGCGAAGTCCGTGCCTAAATTGAAGAGCTAGAGGCTTTCCCAAAGCGGTGGTAGTCACATACCCTGCGCGGAGGGAATGGTGAGCTCAGAGCCTTCCGGCCCGCGTCAGTTATTTTCTAGTTGTAGACACGCTGGGCGGATCGGGCTTAG	40.208	52
	200 bp periodic-stiffness DNA 52 GC%	CCTGTAGAGAACCCGGGGCTTCCTAGGGATTCCCTGTGATTCCCCCAGTCTTCCTGGGGAGAACCCAGGGCTTCCTGTACTTTCCCCCGGGAAACCAGGGGTTTCTACCGTAAATCATGTACTTTCCGTAGTAAAACGTAGTATTTTGTGGGGCTTCCCTGGGAGAACTAGGGGTTTCTGCAGTAAAATACGGGGTTTTG	40.1778	52
	200 bp random-stiffness DNA 58.5 GC%	GACAGTCTGACAAATTTATCAGATCAGGTTCGCTCGAGCTAACAGGGAGCGTTATGTTAAGATGCAAGGGGCTGCCAAGCAGGTAGGAGGAGTGGTATATATTTCCCTAGCATAGACGGGTTTTCCTGTCTTAGAAACTGTGTTGAAGTCTCCGGCGGCATGTAACGCCGTCTCCTCTTTCTTTTGCACTCTTGGGCGTA	40.031	58.5
	200 bp periodic-stiffness DNA 58.5 GC%	CCCCGGGTTTCCGTAGGGCTTCCCAGTAGAAACACTGGTTTCCCCTGGTCTTCCCTGGGAGAACCTGGGGCTTCCCACTAAGAACCCGGGTTTCCCTGTACTTTCCTAGGGTCTTTATGGGGCTTCCCGGGGTTTCTGGTGGTTCTCCCAGGGGAAACTGGGGAGAACCCACGGTTTCCGGGGGGATTCATAGGGTTTCG	40.286	58.5
	200-bp periodic-stiffness DNAs with varying periods of oscillation	Sequence	Mean stiffness (kcal·mol–1·rad–2)	GC%
	200 bp periodic-stiffness DNA (9.6 bp period)	CCATATGAAATATGGAGAACCAGGGGTTTCGTGTGGAAACACTGACTTCCACGAGGTTTACGGTGAAACACATCCTTCCCGGGTTTTACGTGGTTTCCTAGTGAAACGCACTGAAACGTATGTTTTACACATTTTATACGTCTTCCATGTGAATCTACGGAAGAGTGTATTTTCCTGGGCGAACTGTAGGAACTGCCACG	39.77	45
	200 bp periodic-stiffness DNA (9.8 bp period)	CCATATATTTCGTGTGAAAAGTACGGAGAACCCGGGCTTCCCATGCTTTCCCGGGGAAACCTGTGGAAATATGTAGAAACGTGGTAAAACATGGCTTTCCATACGAAATACCATAAAACTACGTAAAACCGGGGCTTCCTACACTTTCCACCTGAAATGCAGTGAAATACACCAAAACGGGGGGAATCATGGCAAATTGG	40.5087	45
	200 bp periodic-stiffness DNA (10 bp period)	ACAGGGGTTTCTGTAGTAAATCGTAGGTTTCGCTGTAATTTGCCACAATTCCCCGGGCTTCCCTGTATTTCTACTATAAATCGTAGGGAACTGTACCTTTTGCTACGCTTTACCCGGTTCCCCCGGTTCGACCTAGTAAAATGTGCATTTCCCTATAGAAACGGGGTAAATCATGGCTTTTGCGGTGTTTCTACTGTCTT	40.4315	45
	200 bp periodic-stiffness DNA (10.2 bp period)	CCGGGGGGAAACGTGGTAATTTGTAGTGAAATATGGGGCTTCCCGGGGTTTCTATAGTAAAACTGTAGGAAACCCATGGAAACCTATACTTTCCTGGTGTTTCCCTAGGAGAACTGGGGAGAACCTGGGGTTTCGTAGTATTTCTGTGTAAAACTATAGGGATTCACACTGAAATGGTGCAAATCCACAGGATTCCGTAT	40.0365	45
	200 bp periodic-stiffness DNA (10.4 bp period)	ACTGGGGAGAACCTAGGGATTCCCGGGGAGAACCAGTGATTTCCTAGGGGAAACATGTGTTTCTACACTATTTCCGTACTAAAACAGTGGTTCTCCTGGGTCTTCCTGGTGATTCCCCCGGGTTTCTACAGTAAAACCCACAGAAATGCATGGTTTCTATAGGGAAATGTGTAGTTTCTGTACCAAAACATGGTATTTCA	40.089	45
	200 bp periodic-stiffness DNA (10.6 bp period)	CCCCATGCTTTCTACAGTAAAACTAGGGTAAAACATGTATTTCCCGTATGTTTCCAGTATATTTCTAGGGGGATTCCTGGGTAAAACTGTACCTTTCCTAGGGATTCCCCGGGGTTTCCCCATAGAAACTGCGGGGAAACAGGTGTTTTCTAGGGGGTTTCTGGGGGGAAACATGTGCTTTCTGTATATTTTACATGGGT	40.2274	45
	200 bp periodic-stiffness DNA (10.8 bp period)	ACATAGTGTTTTATGTGTCTTTTATAGTGCTTTTATAGTAAGAACCACCCAAATCCCCTGGTTTAACCCGGGGTTTTACGTAGTTCTCCTAGGGAGAACTGTGGCGAAACATACGGATTCCCCAGGTCTTCCTACAGGAAACCGTGGTAAAACTATAGTAAAACCCGGGGGAAACTAGGGGATTCTGGGGTATTTCCAGG	40.138	45
	200 bp periodic-stiffness DNA (11 bp period)	ACTGTACTAAAAGGTACGTCTTCCTATAGTAAAACCTGGGGATTCCCACTGAGAAGCTATAGGTTTCTACGTGGATTCCTGGGGTAAAACCTAGGGAGAACTGTAGCGAAATATGGGGAGAACCGTAGTAAAACCTAGGGGAAACCTGGGGGAAACTGGGGTAAAAGTGTAGGCTTCCTGCACATTTTGGTACATTCTTT	40.2263	45
	200 bp periodic-stiffness DNA (11.4 bp period)	TCCTAGGGTCTTCCTGTGTCAATTCTGGGGTATTTTGTGTGTAAATTACTGTGAGTTTCTAGGGGGTTTCCCCGTATCTTCTCACAGGCTTTCCATAGGGAAGACCGGGGTAAAAGTGTGGGGATTCCCCGTAGTTTTGTACGGTAATTCTATAGGGCTTCCTGTATGTTTTCATGTGGCTTTCCCATACGAAATAGTAC	39.8313	45
	200-bp DNAs with hybrid stiffness periodicity	Sequence	Mean stiffness (kcal·mol–1·rad–2)	GC%
	200 bp random-stiffness DNA	CCAATCGTATCCATGTAACACAACTAAGTTGAACCCGCACAGGATTCCGTCCATTTAACATACCCGCTACCTTTTGGGGTAAGCCCGCAAGGCGGGTTTTCACTTTTTGGGATCGTGTTAGACTTGTTAGCGAGTCGCATCGAGGAATGCCAATATGAGATTTGAAGTAGACCGGTAGTTTATTCTATGGTTTGTAAGGT	40.038	45
	200 bp random-stiffness DNA Hybrid-11	CCAATCGTATCCATGTAACACAACTAAGTTGAACCCGCACAGGATTCCGTCCATTTAACATACCCGCTACCTTTTGGGGTAAGCCCGCAAGGCTCTCCTGGGTCTTTTGGGATCGTGTTAGACTTGTTAGCGAGTCGCATCGAGGAATGCCAATATGAGATTTGAAGTAGACCGGTAGTTTATTCTATGGTTTGTAAGGT	39.68	46
	200 bp random-stiffness DNA Hybrid-31	CCAATCGTATCCATGTAACACAACTAAGTTGAACCCGCACAGGATTCCGTCCATTTAACATACCCGCTACCTTTTGGGGTAAGCCCGCGTGGTTCTCCTGGGTCTTCCTGGATCGTGTTAGACTTGTTAGCGAGTCGCATCGAGGAATGCCAATATGAGATTTGAAGTAGACCGGTAGTTTATTCTATGGTTTGTAAGGT	39.344	46.5
	200 bp periodic-stiffness DNA	ACTGGGGAGAACCTAGGGATTCCCGGGGAGAACCAGTGATTTCCTAGGGGAAACATGTGTTTCTACACTATTTCCGTACTAAAACAGTGGTTCTCCTGGGTCTTCCTGGTGATTCCCCCGGGTTTCTACAGTAAAACCCACAGAAATGCATGGTTTCTATAGGGAAATGTGTAGTTTCTGTACCAAAACATGGTATTTCA	40.089	45
	100-bp DNAs with/without stiffness periodicity with/without GC% periodicity	Sequence	Mean stiffness (kcal·mol–1·rad–2)	GC%
	100 bp random-stiffness DNA V1	AGCAAGGTCACCAGGCCCCAAAGCAGCTTAACACCCGCAATTATCTCTTGTACACTTTGCAAGGATTGATGTGTGTAAGCTTTTATTTGATTCGGTGGAG	40.001	45
	100 bp random-stiffness DNA V2	GAGTGGCGGCTAGGGCTTCTGAATAATAGAATTGTCGTATTAGTACCCTTTAGGCGATATCAGATCTTGGTCCGGGGCGATCTATAAGCGCTATAAGAAA	40.3596	45
	100 bp periodic-stiffness DNA V1	CCTATACAAAACTACATATTTCCGGGGGGAAAGTGTGTAAATTGCCACGATTCCTGTAGTTTTCGTAGTATTTCTATAGGTTCTCGTGGGTCTTCCCGGG	39.92	44
	100 bp periodic-stiffness DNA V2	ACCAGGGATTTCACACCAATTTACTATAGAAACTGGTGCTTTCCTAGGGTTTTGTATGGTTCTCCCAGGGCTTCCCCATAGAAATATGTGCTTTCTGGGG	40.082	45
	100 bp random-stiffness periodic-GC DNA V1	ACGTTTAGCCCTATGTTCTCGGTATTAGCTCGCATTATGCCGAACATTGCGTCGTTAACGGGAGATTGAAGCCCATATTGCGTCTCTATCACCGAGAATT	40.17	46
	100 bp random-stiffness periodic-GC DNA V2	GCTTATGGACCTGTAAAGCCCTTGTAGAACGCCTTAACACCCAGTTAAGGGAGACATAGAGCCCTTATAGCGTCAAGTATCCCCAAATCTTCCCCTTTTA	40.2959	46
	100 bp random-stiffness periodic-GC DNA V3	TAGTATCAGGCTGTAAGTCCCACATACTCCTCCTTATAGGGGATACTCATCCCGAAAAACGGGGATAAGCACGTCTATGAGCTCCTTATACCGCTTAGTT	38.39	46
	100 bp random-stiffness periodic-GC DNA V4	AGACAATCGCGATATGGTCGAGCATTTGCAGCCTATTACGCCTCTAATCGCTCTGTATGTCGGCAAATGGACGGTATACAGAGGGTTAAGTGGCTCATAA	38.155	47
	100 bp periodic-stiffness periodic-GC DNA V1	ACTAGGGGTTTTGTAGGGGAATTGTGGCTCTTCATGGGGCTTTATGGGGAGAACTAGGGCTTTTGTAGGGCTTTAGTGGGAGATCTACGGGATTTGGTAG	39.96	49
	100 bp periodic-stiffness periodic-GC DNA V2	ATAGGGGGATTCATGGGGGAAATGTGGGAGATCTACGGCTTCTTGTGGGGAAATAGGGGGTTTTGTAGGGCTTTACAGGGCTTTTGTGGGTCTTTGTACG	39.9175	50
	150-bp ACRO_Composites found in human centromeres	Sequence	Mean stiffness (kcal·mol–1·rad–2)	GC%
	150 bp random-stiffness DNA	ATGTTTATTGAAGGAGTCGTCGGTACAGCCCCGCCTTCAGAGATCAATACTTCTATGGACGCCCGCAGTGGAGATCCCAGTGTAGCGGCGCGGGCCTCCGGTTACGCGGATCCGCACGAGGAGAAAAACAGAGGGTCTATCTTAGGCGCC	39.1	57.3
	150 bp ACRO_Composite 14_1	CAGCTTCCCACACCCTGGAATCACCTGCAAACTCACGGACCTTACTGCAACCATCCCCCATTTCTTTCACCTCTTCACCCCCTGCCTTCAGGGACTCTCCTGGGTCTCCCAGCTTCTCTCCAGCCTTCCCCAGATTTCTGCCACAGTCAG	39.6	56.7
	150 bp ACRO_Composite 15_7	TTTGAGAGTAGCTGAAGGAGACACAAGAGTCCCTGTGGGCTGAGGGCAAAGACCTGAGAGAGACCAGGGAGGACCTCAGTGAAGTCTGTGAGTCTGTAGGTGATTCCGGAGTGTGGGAGGCTGACTCCCGCTGAAATCTGGGCGTGGTGG	38.7	57
	150 bp ACRO_Composite 22_1	CCAGCTACTCTCCAACCACGCCCAGATTTCAGCTGGAAGCAGTTCCTTGCACCCGGAATCACCACCAAACTCACCAATTTCACTCAATTACTCCCCAGTCTCTCTCATGTCTTCACCACCCTCAGGGACTCTCCCGTCTGTCCAGCTACT	40	53.2
	150 bp ACRO_Composite 22_7	GACTGTGGCAGAAATCTGGGGAAGGCTGGAGAGAAGCTGGGAGACCCAGGAGAGTCCCTGAAGGCAGGGGGTGAAGAGGTGAAAGAAATGGGGGAGGGTTGCAGTAAGGTCCGTGAGTTTGTAGGTGATTCCTGGGTGCGGGAAGCTGAC	38	57.3
	Primers used for binding rate measurements
	Cy5-biotin forward primer	Cy5-GATTAGTTGGTTAAATGAAGACAAG[T]GT
	Complementary primer to Cy5-biotin forward primer	ACACTTGTCTTCATTTA
	Cy3 reverse primer	Cy3-AACTAATCCGAAGCTCTCGGAGTCGGTC
	Complementary primer to Cy3 reverse primer	GACCGACTCCGAGAGCT
	T is the biotinylated thymine. The homology sequence is underlined.

## Sheet: Table S2
Supplementary Table S2
Gene stratification based on transcriptional activity measured by RNA-seq experiments
Gene group	The index for each quartiles of gene expression (1 being the lowest and 4 being the highest)
Frequency range	Transcription FPKM thresholds used to divide the genes into quartiles; FPKM values were obtained from RNA-seq data described underneath each table.
Number of genes	Number of genes in each group.
	Yeast gene group	Frequency range	Number of genes
	1	0 - 22.2	1245
	2	22.2 - 42.2	1244
	3	42.2 - 78.2	1261
	4	78.2+	1244
	Yeast RNA-seq data: GSM4575876
	Mouse gene group	Frequency range	Number of genes
	1	0 - 4.605 x 10-8	6027
	2	4.605 x 10-8 - 0.54605	5438
	3	0.54605 - 4.605	5371
	4	4.605+	5593
	Mouse mESC RNA-seq data: GSM2183915
	Human gene group	Frequency range	Number of genes
	1	0 - 0.0033	5732
	2	0.0033 - 0.733	5892
	3	0.733 - 7.33	5413
	4	7.33+	6369
	Human HeLa cell RNA-seq data: GSM3032117
	L1-staged larvae gene group	Frequency range	Number of genes
	1	0 - 1.1	2829
	2	1.1 - 8	2818
	3	8 - 32	2802
	4	32+	2812
	L1-staged larvae RNA-seq data: GSM6756781
	Fly S2 cell gene group	Frequency range	Number of genes
	1	0 - 10-4	3729
	2	10-4 - 9	2708
	3	9 - 29	2902
	4	29+	2620
	Fly S2 cell RNA-seq data: GSM410195

## Sheet: Table S3
Supplementary Table S3
Average PRO-seq reads from classified human satellite regions in T2T-CHM13 reference genome
Chromosome	Name	Start	End	region_len	avg_POS PRO-seq	Peak frequency	Peak height	Classification
10	hsat3_10_1(A1)	38527422	38641012	113590	1.62859	0.100459	0.0269586	aperiodic
10	hsat2_10_1(B)	38641012	38654452	13440	0.0300595	0.303954	0.0536511	aperiodic
10	censat_10_1(rnd-6_family-4384)	38658855	38659959	1104	3.62862	0.0515177	0.0475354	aperiodic
10	censat_10_2(TGGCCCn,ATGAAn)	38797521	38806963	9442	25.705	0.0875801	0.0310093	periodic
10	hsat3_10_2(A2)	38843946	38989004	145058	0.269727	0.0875801	0.0256965	aperiodic
10	censat_10_3(rnd-6_family-4384)	39010294	39011571	1277	2.43931	0.0515177	0.0501368	aperiodic
10	censat_10_4(rnd-6_family-4384)	39037052	39038528	1476	1.18496	0.066973	0.027054	aperiodic
10	mon_10_1	39068402	39617055	548653	2.4206	0.0927318	0.0308157	periodic
10	dhor_10_1(S01CMH1d)	39617055	39624973	7918	0.191084	0.0798524	0.0364356	aperiodic
10	dhor_10_2(SF1)	39624973	39633793	8820	0.0456916	0.0824283	0.0352335	periodic
10	hor_10_1(S1C10H1L)	39633793	41664589	2030796	0.00365275	0.0824283	0.0331041	periodic
10	hor_10_2(S1C10H1-B)	41664589	41779242	114653	0.0639669	0.0824283	0.0348403	periodic
10	hor_10_3(S1C10H1-C)	41779242	41881070	101828	0.0113328	0.0798524	0.0368713	aperiodic
10	hor_10_4(S1C10H2)	41881070	41926237	45167	0.0110257	0.0850042	0.0342247	periodic
10	dhor_10_3(SF1)	41926237	41933458	7221	7.57914	0.0850042	0.032742	periodic
10	mon_10_2	41935290	42049585	114295	2.64105	0.0901559	0.0316369	periodic
10	dhor_10_4(SF1)	42049585	42061843	12258	0.722549	0.0824283	0.0355733	periodic
10	hsat2_10_2(A1,A2)	42062303	42076392	14089	0.00447157	0.115915	0.0481512	periodic
10	hsat3_10_3(B3)	42076392	42377074	300682	0.348667	0.0901559	0.0292851	periodic
10	hsat3_10_4(B3,A2)	42377074	42525470	148396	0.114383	0.0927318	0.0276543	aperiodic
10	bsat_10_1(LSAU-BSAT_Composite)	42525470	42547087	21617	0.0541703	0.0978836	0.0338813	periodic
10	hsat2_10_3(A1,A2)	42547087	42982864	435777	0.00255635	0.303954	0.0519971	aperiodic
10	censat_10_5(rnd-6_family-4384)	42987255	42990929	3674	0.152422	0.0540936	0.0389422	aperiodic
10	censat_10_6(rnd-6_family-4384)	43025928	43028494	2566	0.910366	0.0927318	0.0447172	periodic
10	hsat2_10_4(B)	43042055	43048390	6335	0.0707182	0.303954	0.0550838	aperiodic
10	censat_10_7(rnd-6_family-4384)	43053137	43055549	2412	2.09121	0.0824283	0.0427675	periodic
10	censat_10_8(CATCTn)	43103506	43106378	2872	0.119429	0.0824283	0.0366117	periodic
10	hsat3_10_5(A1)	43172682	43199266	26584	0.119621	0.0978836	0.0277821	aperiodic
10	dhor_10_5(SF1)	43199266	43200504	1238	0.0363489	0.0850042	0.0370717	periodic
10	hsat1_10_1(HSat1B)	43442772	43443011	239	0	0.0927318	0.0296118	periodic
11	mon_11_1	48819609	49118925	299316	3.83061	0.0875801	0.0301441	periodic
11	mon_11_2	50290423	50295963	5540	0.110108	0.0927318	0.0389415	periodic
11	censat_11_1(ATATATTn)	50477709	50480166	2457	0.010175	0.105611	0.0512327	periodic
11	mon_11_3	50537299	51019951	482652	2.24294	0.0927318	0.030476	periodic
11	dhor_11_1(SF3)	51019951	51021486	1535	0.177199	0.0953077	0.0320448	periodic
11	dhor_11_2(S3C11H3d)	51021486	51023358	1872	0.105769	0.0953077	0.032965	periodic
11	hor_11_1(S3C11H2)	51023358	51035789	12431	0.0194675	0.0978836	0.0322455	periodic
11	hor_11_2(S3C11H1L,S3C11H3d)	51035789	51061948	26159	0.0373868	0.100459	0.0335179	periodic
11	hor_11_3(S3C11H1L)	51061948	54413484	3351536	0.0348965	0.103035	0.0311985	periodic
11	hor_11_4(S3C11H2)	54413484	54443345	29861	0	0.0953077	0.0328243	periodic
11	dhor_11_3(SF3)	54443345	54450838	7493	0.0101428	0.0978836	0.0301122	periodic
11	hor_11_5(S3C11H2)	54450838	54476419	25581	0.00449552	0.0953077	0.0344703	periodic
11	dhor_11_4(SF3)	54476419	54481671	5252	0.0761615	0.0901559	0.0313925	periodic
11	dhor_11_5(S3C11H3d)	54481671	54487965	6294	0.115666	0.0927318	0.0330388	periodic
11	mon_11_4	54681429	55197726	516297	2.83868	0.0927318	0.0301162	periodic
11	censat_11_2(SATR)	55212211	55216869	4658	0.193431	0.0953077	0.0258394	aperiodic
12	censat_12_1(SATR)	30997656	31000798	3142	1.80681	0.103035	0.028215	aperiodic
12	censat_12_2(LSAU)	34085570	34085868	298	0	0.0901559	0.0303195	periodic
12	censat_12_3(LSAU)	34087287	34087435	148	0	0.0824283	0.0381929	periodic
12	gsat_12_1(GSATX)	34088798	34089596	798	0	0.100459	0.0536603	periodic
12	mon_12_1	34156787	34163766	6979	2.04972	0.0927318	0.0375101	periodic
12	gsat_12_2(GSATII,rnd-6_family-1431)	34163766	34284892	121126	0.228044	0.103035	0.0320485	periodic
12	mon_12_2	34284892	34473230	188338	2.15445	0.0901559	0.0287749	aperiodic
12	gsat_12_3(GSATII,rnd-6_family-1431)	34473230	34485622	12392	0.00831181	0.103035	0.0301137	periodic
12	mon_12_3	34485622	34555160	69538	5.72802	0.0927318	0.0296	periodic
12	dhor_12_1(S5C1H5d)	34555160	34556862	1702	0.426557	0.0927318	0.0304624	periodic
12	dhor_12_2(S01CMH1d)	34556862	34579235	22373	0.124749	0.0824283	0.0347739	periodic
12	dhor_12_3(S01C12H3d)	34579235	34589265	10030	0.173081	0.0824283	0.0319899	periodic
12	dhor_12_4(S1CMH3d)	34589265	34593492	4227	0.277029	0.0824283	0.0348276	periodic
12	hor_12_1(S1C12H2)	34593492	34620838	27346	0.166935	0.0901559	0.034631	periodic
12	hor_12_2(S1C12H1L)	34620838	37202490	2581652	0.0393574	0.0901559	0.0319959	periodic
12	dhor_12_5(S1CMH3d)	37202490	37221403	18913	0.121398	0.0850042	0.0325773	periodic
12	dhor_12_6(S01C12H3d)	37221403	37229728	8325	0.30006	0.0824283	0.0342095	periodic
12	dhor_12_7(SF5)	37229728	37369877	140149	0.933421	0.0953077	0.031122	periodic
12	censat_12_4(SST1_Composite)	37369877	37376020	6143	3.175	0.105611	0.0286463	aperiodic
12	mon_12_4	37474257	37484266	10009	1.57828	0.0927318	0.0341965	periodic
12	censat_12_5(SST1_Composite)	37484266	37487829	3563	0.00589391	0.0953077	0.0312465	periodic
12	mon_12_5	37488563	37492437	3874	0.0258131	0.0927318	0.0345352	periodic
12	censat_12_6(SST1_Composite)	37492727	37500838	8111	0.983233	0.103035	0.0284082	aperiodic
12	mon_12_6	37548352	37997178	448826	2.69443	0.0927318	0.0296185	periodic
12	gsat_12_4(GSATX)	38101271	38110606	9335	0.00235672	0.0978836	0.0465507	periodic
12	censat_12_7(rnd-6_family-13719,20)	38110606	38113553	2947	0.355616	0.108187	0.0328566	periodic
12	mon_12_7	38541490	38541929	439	0.22779	0.0875801	0.0313124	periodic
13	tar_13_1	0	2540	2540	0.131102	0.329713	0.189488	aperiodic
13	hsat3_13_1(B4)	2540	65257	62717	0.263868	0.0927318	0.0285759	aperiodic
13	hsat1_13_1(HSat1A)	65257	4973153	4907896	0.00299049	0.118491	0.0863916	periodic
13	bsat_13_1(LSAU-BSAT_Composite)	4973153	5000116	26963	0.0437266	0.0850042	0.034421	periodic
13	hsat3_13_2(A4)	5000116	5152650	152534	0.24232	0.0875801	0.026541	aperiodic
13	censat_13_1(CER)	5264112	5265488	1376	9.68532	0.0901559	0.0249705	aperiodic
13	hsat5_13_1(HSat5)	5265488	5266737	1249	3.93034	0.105611	0.0298236	periodic
13	hsat5_13_2(HSat5)	5270328	5271696	1368	0.601608	0.0927318	0.0292733	periodic
13	censat_13_2(SATR)	5325025	5327159	2134	10.1111	0.0927318	0.0253359	aperiodic
13	censat_13_3(SATR)	5330083	5333927	3844	0.334027	0.0901559	0.0262027	aperiodic
13	censat_13_4(ACRO_composite)	5338346	5358151	19805	0.910679	0.0927318	0.0476054	periodic
13	censat_13_5(CER)	5369400	5424523	55123	3.25175	0.0927318	0.0244807	aperiodic
13	gsat_13_1(GSATII)	5448211	5450627	2416	0.149007	0.103035	0.0300076	periodic
13	bsat_13_2	5455783	5467957	12174	3.20511	0.0850042	0.0281254	aperiodic
13	bsat_13_3	5638362	5650823	12461	2.91959	0.0978836	0.0279832	aperiodic
13	rDNA_13_1	5770548	9348041	3577493	10965.4	0.0978836	0.0265881	aperiodic
13	censat_13_6(ACRO_composite)	9348041	9356166	8125	1.41342	0.0927318	0.0424217	periodic
13	censat_13_7(rnd-1_family-0)	9389035	9398072	9037	0.0818856	0.105611	0.0536774	periodic
13	gsat_13_2(GSATII/TAR)	9398072	9405275	7203	9.23782	0.103035	0.0318731	periodic
13	censat_13_8(SATR)	9429676	9433528	3852	0.129283	0.0901559	0.0256431	aperiodic
13	censat_13_9(SATR)	9436457	9438504	2047	10.595	0.0953077	0.0244687	aperiodic
13	hsat3_13_3(A4)	9594120	9627520	33400	0.578024	0.0798524	0.0266611	aperiodic
13	bsat_13_4(LSAU-BSAT_Composite)	9627520	9796372	168852	0.0909732	0.0978836	0.0338947	periodic
13	hsat1_13_2(HSat1A)	9796372	9802883	6511	0.0175088	0.118491	0.076869	periodic
13	hsat3_13_4(B3,A1)	9802883	9891532	88649	0.0939999	0.0824283	0.0299756	periodic
13	bsat_13_5	9940993	9956401	15408	0.0218069	0.0772765	0.0338169	aperiodic
13	hsat3_13_5(A4)	9956401	9967744	11343	1.03659	0.0747006	0.0263622	aperiodic
13	censat_13_10(GATAn)	10154534	10157059	2525	0.0835644	0.257588	0.0471637	aperiodic
13	hsat1_13_3(HSat1B)	10165986	10219675	53689	0.409171	0.0901559	0.0283486	aperiodic
13	hsat3_13_6(B3)	10219675	10407295	187620	0.0826138	0.0824283	0.0317391	periodic
13	censat_13_11(SATR)	10425695	10428614	2919	0.398082	0.0927318	0.0272609	aperiodic
13	gsat_13_3(GSATII/TAR)	10451876	10455552	3676	15.876	0.100459	0.0295135	periodic
13	censat_13_12(ACRO_composite)	10456388	10469104	12716	1.5324	0.0927318	0.0563487	periodic
13	hsat5_13_3(HSat5)	10479035	10480398	1363	1.69406	0.100459	0.0282313	aperiodic
13	hsat5_13_4(HSat5)	10497523	10499652	2129	0.868953	0.0772765	0.0283294	aperiodic
13	hsat5_13_5(HSat5)	10512131	10513010	879	1.40842	0.13137	0.0300382	periodic
13	censat_13_13(CER)	10513356	10627789	114433	9.04988	0.0953077	0.0293281	periodic
13	hsat3_13_7(A4,A2)	10627789	10733822	106033	0.250252	0.0850042	0.0261465	aperiodic
13	bsat_13_6	10733822	10738003	4181	0.0200909	0.0875801	0.0361905	periodic
13	hsat1_13_4(HSat1A,B)	10738003	10769666	31663	0.639421	0.118491	0.0452842	periodic
13	hsat3_13_8(A1)	10961021	10970443	9422	2.98217	0.100459	0.0236905	aperiodic
13	censat_13_14(rnd-6_family-4384)	10987609	10989461	1852	1.0027	0.0540936	0.0479906	aperiodic
13	censat_13_15(rnd-6_family-4384)	11021233	11023216	1983	0.609178	0.0927318	0.0384561	periodic
13	censat_13_16(rnd-6_family-4384)	11048571	11049299	728	1.29121	0.0515177	0.0505768	aperiodic
13	hsat3_13_9(A2,A4)	11070649	11143577	72928	0.0566038	0.0953077	0.0257186	aperiodic
13	mon_13_1	11143577	11155531	11954	0.851681	0.0901559	0.0285018	aperiodic
13	hor_13_1(S4/6C13/14/21H1)	11155531	11191439	35908	0.754317	0.0901559	0.0291666	periodic
13	mon_13_2	11191439	11334389	142950	2.50924	0.0927318	0.0309318	periodic
13	hsat3_13_10(A4)	11334389	11370461	36072	1.22669	0.0772765	0.0260123	aperiodic
13	mon_13_3	11370461	11417952	47491	5.95696	0.0927318	0.0292784	periodic
13	hsat3_13_11(A4)	11417952	11430303	12351	0.53777	0.0798524	0.0270924	aperiodic
13	mon_13_4	11430303	11490233	59930	2.92601	0.0927318	0.0285556	aperiodic
13	bsat_13_7(LSAU-BSAT_Composite,no_beta)	11615705	11617863	2158	7.72335	0.105611	0.0330643	periodic
13	censat_13_17(rnd-6_family-13719,20)	11617863	11621148	3285	4.22496	0.0850042	0.0281741	aperiodic
13	censat_13_18(rnd-6_family-13719,20)	11700049	11701523	1474	0.763229	0.0824283	0.0277929	aperiodic
13	bsat_13_8(LSAU-BSAT_Composite,no_beta)	11701523	11709200	7677	0.584603	0.0927318	0.0324096	periodic
13	mon_13_5	11737545	11812455	74910	3.83785	0.0927318	0.0294967	periodic
13	hor_13_2(S5C13/14/21H2)	11812455	11831237	18782	1.61484	0.105611	0.0305546	periodic
13	mon_13_6	11831237	11837443	6206	1.67145	0.0798524	0.0297095	aperiodic
13	hsat3_13_12(A4,A1)	11837443	11948431	110988	0.0660882	0.0875801	0.0267374	aperiodic
13	censat_13_19(rnd-1_family-0)	12068771	12070712	1941	0.0783101	0.105611	0.05786	periodic
13	censat_13_20(SST1_Composite)	12084441	12085439	998	4.55611	0.0927318	0.0286783	aperiodic
13	censat_13_21(SST1)	12301366	12440010	138644	3.85945	0.0953077	0.0324506	periodic
13	censat_13_22(SST1_Composite)	12718342	12720259	1917	79.9697	0.0953077	0.0299725	periodic
13	gsat_13_4(GSATII/TAR)	12720259	12725915	5656	79.1372	0.100459	0.0303863	periodic
13	censat_13_23(rnd-1_family-0)	12725915	12735050	9135	12.9964	0.105611	0.0577151	periodic
13	censat_13_24(rnd-6_family-13719,20)	12836659	12839246	2587	10.0649	0.0798524	0.028761	aperiodic
13	bsat_13_9(LSAU-BSAT_Composite,no_beta)	12839246	12842110	2864	3.03073	0.103035	0.0316136	periodic
13	mon_13_7	12968162	13033845	65683	3.5033	0.0927318	0.0299958	periodic
13	hsat3_13_13(A4)	13033845	13038321	4476	0.252011	0.0798524	0.0265869	aperiodic
13	mon_13_8	13038321	13111485	73164	2.2071	0.0927318	0.0301695	periodic
13	hsat3_13_14(A4)	13111485	13119194	7709	0.535089	0.0824283	0.0262371	aperiodic
13	mon_13_9	13119194	13172020	52826	4.02921	0.0927318	0.0311474	periodic
13	hsat3_13_15(A4)	13172020	13243683	71663	0.632432	0.0875801	0.0260433	aperiodic
13	mon_13_10	13243683	13322481	78798	4.34389	0.0927318	0.0293603	periodic
13	hsat3_13_16(A1,A4)	13322481	13410442	87961	1.49322	0.0901559	0.0263968	aperiodic
13	censat_13_25(rnd-6_family-4384)	13433611	13434116	505	4.29505	0.0927318	0.034943	periodic
13	censat_13_26(rnd-6_family-4384)	13444402	13444624	222	0.103604	0.066973	0.0612467	aperiodic
13	hsat1_13_5(HSat1B)	13694067	13700989	6922	1.91563	0.0978836	0.0313518	periodic
13	hsat1_13_6(HSat1A,B)	13923837	15547593	1623756	0.00877102	0.118491	0.068431	periodic
13	hor_13_3(S2C13/21H1L)	15547593	17498291	1950698	0.0843078	0.115915	0.0334811	periodic
13	hor_13_4(S2C13/21H1-B)	17498291	17508596	10305	0.903348	0.115915	0.0322792	periodic
13	dhor_13_1(SF2)	17508596	17511150	2554	1.60532	0.0901559	0.0305407	periodic
13	dhor_13_2(SF02)	17511150	17515884	4734	2.70913	0.0901559	0.0327681	periodic
13	mon_13_11	17515884	17576696	60812	5.57403	0.0927318	0.0289172	aperiodic
13	censat_13_27(CER)	17710409	17720072	9663	1.67091	0.118491	0.0310053	periodic
13	hsat5_13_6(HSat5)	17959655	17960517	862	0.116009	0.0721248	0.028048	aperiodic
13	hsat5_13_7(HSat5)	18004818	18005403	585	0	0.100459	0.0277734	aperiodic
13	gsat_13_5(GSATX)	18137682	18139572	1890	0.112169	0.0953077	0.0513103	periodic
13	mon_13_12	20484601	20485259	658	0	0.103035	0.0263055	aperiodic
14	tar_14_1	0	2075	2075	0.186506	0.329713	0.192394	aperiodic
14	censat_14_1(ACRO_composite)	2075	225617	223542	6.64458	0.0927318	0.0471332	periodic
14	censat_14_2(SATR)	230957	234807	3850	0.129351	0.0901559	0.024719	aperiodic
14	censat_14_3(ULTRA_novelSat)	260746	632814	372068	0.0692562	0.0798524	0.0371734	aperiodic
14	hsat3_14_1(A4)	740363	763497	23134	0.403216	0.0901559	0.0269214	aperiodic
14	bsat_14_1(LSAU-BSAT_Composite)	763497	965061	201564	0.338523	0.0798524	0.0337057	aperiodic
14	hsat3_14_2(B4)	965061	1246654	281593	0.243003	0.0875801	0.0304199	periodic
14	hsat1_14_1(HSat1A)	1246654	1313023	66369	0.00171767	0.118491	0.0884495	periodic
14	bsat_14_2(LSAU-BSAT_Composite)	1313023	1339985	26962	0.0405014	0.0824283	0.0340774	periodic
14	hsat3_14_3(A4)	1339985	1453417	113432	0.274446	0.0824283	0.026477	aperiodic
14	hsat5_14_1(HSat5)	1565957	1567205	1248	3.91747	0.103035	0.0287688	aperiodic
14	hsat5_14_2(HSat5)	1570796	1572164	1368	0.601608	0.0901559	0.0277438	aperiodic
14	censat_14_4(SATR)	1625478	1627614	2136	9.58755	0.0927318	0.0241298	aperiodic
14	censat_14_5(SATR)	1630538	1634388	3850	0.333506	0.0875801	0.024872	aperiodic
14	gsat_14_1(GSATII)	1658892	1662773	3881	19.1118	0.103035	0.0310103	periodic
14	censat_14_6(ACRO_composite)	1663585	1665185	1600	0.48375	0.0927318	0.0849965	periodic
14	censat_14_7(CER)	1682156	1755893	73737	3.26295	0.0901559	0.0246621	aperiodic
14	gsat_14_2(GSATII)	1779757	1782280	2523	0.177963	0.103035	0.0285018	aperiodic
14	bsat_14_3	1787439	1799664	12225	3.27951	0.0978836	0.0276092	aperiodic
14	bsat_14_4	1969079	1981517	12438	2.71274	0.0978836	0.0282026	aperiodic
14	rDNA_14_1	2099537	2817811	718274	11279.6	0.0978836	0.026424	aperiodic
14	censat_14_8(ACRO_composite)	2817811	2825763	7952	2.31502	0.0927318	0.0410455	periodic
14	censat_14_9(rnd-1_family-0)	2860329	2869347	9018	0.0852739	0.105611	0.0551209	periodic
14	gsat_14_3(GSATII/TAR)	2869347	2876512	7165	8.88095	0.103035	0.0321616	periodic
14	censat_14_10(SATR)	2900972	2904824	3852	0.131101	0.0901559	0.0259929	aperiodic
14	censat_14_11(SATR)	2907757	2909807	2050	11.0405	0.0978836	0.0244647	aperiodic
14	hsat5_14_3(HSat5)	2955856	2957090	1234	1.49352	0.105611	0.0291136	periodic
14	censat_14_12(CER)	2957090	2962147	5057	0.678465	0.04379	0.0289392	aperiodic
14	hsat3_14_4(A4)	3069165	3102244	33079	0.53871	0.0824283	0.0266162	aperiodic
14	bsat_14_5(LSAU-BSAT_Composite)	3102244	3271404	169160	0.0775479	0.0953077	0.0339871	periodic
14	hsat1_14_2(HSat1A)	3271404	3277915	6511	0	0.118491	0.076518	periodic
14	hsat3_14_5(B3,A1)	3277915	3371795	93880	0.0941841	0.0824283	0.029958	periodic
14	bsat_14_6	3421271	3436747	15476	0.021711	0.0772765	0.0344168	aperiodic
14	hsat3_14_6(A4)	3436747	3448003	11256	0.994048	0.0747006	0.0264809	aperiodic
14	hsat1_14_3(HSat1B)	3616871	3699683	82812	0.288207	0.0901559	0.0292969	periodic
14	hsat3_14_7(B3)	3699683	3903531	203848	0.0750755	0.0824283	0.0310244	periodic
14	censat_14_13(CER)	3943532	3946805	3273	9.97495	0.04379	0.0251469	aperiodic
14	hsat5_14_4(HSat5)	3946805	3948059	1254	3.55263	0.105611	0.0284229	aperiodic
14	hsat5_14_5(HSat5)	3959672	3961776	2104	0.372148	0.103035	0.0301994	periodic
14	hsat5_14_6(HSat5)	3981870	3983236	1366	0.197657	0.0953077	0.0256531	aperiodic
14	censat_14_15(SATR)	3993446	3996350	2904	0.220041	0.0901559	0.0249162	aperiodic
14	gsat_14_4(GSATII/TAR)	4020781	4023620	2839	20.3727	0.0953077	0.028597	aperiodic
14	censat_14_16(ACRO_composite)	4023620	4035909	12289	2.85052	0.0927318	0.0542641	periodic
14	bsat_14_8(LSAU-BSAT_Composite)	4086229	4358753	272524	0.607055	0.0978836	0.033113	periodic
14	bsat_14_7(LSAU-BSAT_Composite,no_beta)	4374370	4376964	2594	3.46916	0.105611	0.032448	periodic
14	censat_14_14(rnd-6_family-13719,20)	4376964	4377796	832	2.1887	0.0798524	0.0375914	aperiodic
14	censat_14_17(CER)	4526458	4551414	24956	2.26435	0.0927318	0.0243018	aperiodic
14	hsat3_14_8(A4)	4662667	4699720	37053	0.498934	0.0824283	0.0265396	aperiodic
14	hsat3_14_9(B2)	4699720	4924998	225278	0.506552	0.0953077	0.02419	aperiodic
14	bsat_14_9(LSAU-BSAT_Composite)	4974093	5419772	445679	0.0610439	0.0978836	0.0335671	periodic
14	hsat3_14_10(A4,A2)	5419772	5593325	173553	0.281516	0.0875801	0.0266351	aperiodic
14	censat_14_18(CER)	5699702	5704320	4618	12.6507	0.04379	0.029139	aperiodic
14	hsat5_14_7(HSat5)	5704320	5705560	1240	4.14677	0.105611	0.0310074	periodic
14	hsat5_14_8(HSat5)	5718045	5720181	2136	0.418071	0.0772765	0.0290374	aperiodic
14	hsat5_14_9(HSat5)	5737307	5738656	1349	0.479615	0.100459	0.0283768	aperiodic
14	censat_14_19(SATR)	5791601	5793723	2122	11.5622	0.0901559	0.0239161	aperiodic
14	censat_14_20(SATR)	5796647	5800474	3827	0.330024	0.0875801	0.0256098	aperiodic
14	gsat_14_5(GSATII/TAR)	5824968	5828980	4012	19.0257	0.100459	0.0297796	periodic
14	censat_14_21(ACRO_composite)	5828980	5835013	6033	3.73628	0.0927318	0.0521656	periodic
14	hsat5_14_10(HSat5)	5841450	5842680	1230	1.25366	0.105611	0.0301694	periodic
14	censat_14_22(CER)	5842680	5846873	4193	0.275698	0.04379	0.027458	aperiodic
14	hsat3_14_11(B3)	5886566	5899451	12885	0.355297	0.0850042	0.0288894	aperiodic
14	hsat1_14_4(HSat1A,B)	5899451	5939240	39789	0.302697	0.118491	0.0568661	periodic
14	censat_14_23(rnd-6_family-4384)	5997299	5997583	284	1.30634	0.0592453	0.0512645	aperiodic
14	censat_14_24(rnd-6_family-4384)	6007867	6008372	505	6.58812	0.0927318	0.0401843	periodic
14	hsat3_14_12(A1,A4)	6031537	6118542	87005	0.224562	0.0901559	0.0263891	aperiodic
14	mon_14_1	6118542	6199662	81120	3.91461	0.0927318	0.029406	periodic
14	hsat3_14_13(A4)	6199662	6260270	60608	0.811708	0.0824283	0.0261312	aperiodic
14	mon_14_2	6260270	6314167	53897	5.36976	0.0927318	0.0308978	periodic
14	hsat3_14_14(A4)	6314167	6321911	7744	0.361699	0.0798524	0.0269854	aperiodic
14	mon_14_3	6321911	6397784	75873	3.03821	0.0927318	0.0298782	periodic
14	hsat3_14_15(A4)	6397784	6402296	4512	0.263963	0.0798524	0.0268026	aperiodic
14	mon_14_4	6402296	6442583	40287	3.33534	0.0901559	0.0282677	aperiodic
14	bsat_14_10(LSAU-BSAT_Composite,no_beta)	6559657	6561849	2192	9.47673	0.108187	0.0359065	periodic
14	censat_14_25(rnd-6_family-13719,20)	6561849	6565138	3289	4.89328	0.0798524	0.0270735	aperiodic
14	censat_14_26(rnd-1_family-0)	6666811	6675927	9116	0.0775559	0.105611	0.0564914	periodic
14	gsat_14_6(GSATII/TAR)	6675927	6680374	4447	3.14077	0.100459	0.0292228	periodic
14	censat_14_27(SST1_Composite)	6680374	6682281	1907	73.032	0.100459	0.0299524	periodic
14	censat_14_28(SST_Composite)	6960007	6988409	28402	4.04648	0.100459	0.0296053	periodic
14	censat_14_29(SST_Composite)	7205438	7206435	997	4.7683	0.100459	0.0270916	aperiodic
14	censat_14_30(rnd-1_family-0)	7220145	7222087	1942	0.549434	0.105611	0.0581375	periodic
14	hsat3_14_16(A4,A1)	7342312	7439251	96939	0.341978	0.0901559	0.0268151	aperiodic
14	mon_14_5	7439251	7445759	6508	0.226798	0.0798524	0.0295701	aperiodic
14	hor_14_1(S5C13/14/21H2)	7445759	7524140	78381	0.351845	0.105611	0.0301522	periodic
14	mon_14_6	7524140	7614054	89914	3.80819	0.0927318	0.0289987	aperiodic
14	bsat_14_11(LSAU-BSAT_Composite,no_beta)	7642456	7650083	7627	3.75967	0.0953077	0.0329877	periodic
14	censat_14_31(rnd-6_family-13719,20)	7650083	7651614	1531	1.16656	0.0824283	0.0254233	aperiodic
14	censat_14_32(rnd-6_family-13719,20)	7730544	7733835	3291	6.86752	0.0824283	0.028218	aperiodic
14	bsat_14_12(LSAU-BSAT_Composite,no_beta)	7733835	7735996	2161	1.95234	0.103035	0.0364227	periodic
14	mon_14_7	7861537	7921487	59950	3.49314	0.0927318	0.0281975	aperiodic
14	hsat3_14_17(A4)	7921487	7933137	11650	0.886524	0.0798524	0.0267465	aperiodic
14	mon_14_8	7933137	7980600	47463	4.48181	0.0927318	0.0292531	periodic
14	hsat3_14_18(A4)	7980600	8005258	24658	1.31	0.0798524	0.0258398	aperiodic
14	mon_14_9	8005258	8146948	141690	2.38751	0.0927318	0.0306246	periodic
14	hor_14_2(S4/6C13/14/21H1)	8146948	8220303	73355	0.576075	0.0901559	0.0286831	aperiodic
14	mon_14_10	8220303	8233032	12729	0.954278	0.0901559	0.0283451	aperiodic
14	hsat3_14_19(A2,A4)	8233032	8315216	82184	0.353378	0.0927318	0.0259736	aperiodic
14	censat_14_33(rnd-6_family-4384)	8336545	8337273	728	2.68819	0.0515177	0.0542318	aperiodic
14	censat_14_34(rnd-6_family-4384)	8362704	8364470	1766	1.06229	0.0927318	0.0370534	periodic
14	censat_14_35(rnd-1_family-0)	8381647	8384690	3043	0.0131449	0.105611	0.0642414	periodic
14	censat_14_36(rnd-6_family-4384)	8432916	8434937	2021	1.00346	0.0540936	0.0499426	aperiodic
14	censat_14_37(rnd-6_family-4384)	8477008	8477831	823	3.77886	0.0875801	0.0544908	periodic
14	censat_14_38(rnd-6_family-4384)	8604781	8606018	1237	3.46483	0.0515177	0.0464255	aperiodic
14	censat_14_39(rnd-6_family-4384)	8649801	8651571	1770	0.152542	0.0540936	0.0461017	aperiodic
14	censat_14_40(rnd-1_family-0)	8700904	8704045	3141	0.46673	0.105611	0.0627414	periodic
14	censat_14_41(rnd-6_family-4384)	8720107	8723407	3300	0.742424	0.0927318	0.0376572	periodic
14	censat_14_42(rnd-6_family-4384)	8750209	8751019	810	0.616049	0.0515177	0.0494672	aperiodic
14	hsat3_14_20(A2,A4)	8772611	8881505	108894	0.0937334	0.0953077	0.0262736	aperiodic
14	mon_14_11	8881505	9059262	177757	2.51426	0.0927318	0.0303408	periodic
14	hsat3_14_21(A4)	9059262	9216586	157324	0.322322	0.0875801	0.026111	aperiodic
14	mon_14_12	9216586	9276576	59990	3.50097	0.0927318	0.0280663	aperiodic
14	hsat3_14_22(A4)	9276576	9288919	12343	0.25877	0.0798524	0.0265256	aperiodic
14	mon_14_13	9288919	9410459	121540	2.75919	0.0927318	0.0299587	periodic
14	bsat_14_13(LSAU-BSAT_Composite,no_beta)	9532583	9534775	2192	10.3057	0.110763	0.0312249	periodic
14	censat_14_43(rnd-6_family-13719,20)	9534775	9537974	3199	4.30635	0.103035	0.0297761	periodic
14	mon_14_14	9546814	9565812	18998	1.64417	0.0927318	0.0314499	periodic
14	censat_14_44(rnd-6_family-13719,20)	9641816	9643249	1433	0.40335	0.0901559	0.0316309	periodic
14	bsat_14_14(LSAU-BSAT_Composite,no_beta)	9643249	9650986	7737	0.545043	0.0978836	0.0306143	periodic
14	mon_14_15	9680573	9712130	31557	0.334221	0.0901559	0.0285361	aperiodic
14	hsat1_14_5(HSat1A)	9712130	9727541	15411	0	0.118491	0.0629937	periodic
14	mon_14_16	9727541	9761816	34275	5.26162	0.0927318	0.0299291	periodic
14	hsat3_14_23(A4)	9761816	9782799	20983	1.05109	0.0721248	0.0250935	aperiodic
14	mon_14_17	9782799	9857282	74483	4.16048	0.0901559	0.029586	periodic
14	bsat_14_15(LSAU-BSAT_Composite,no_beta)	9885813	9893448	7635	2.77695	0.100459	0.031845	periodic
14	censat_14_45(rnd-6_family-13719,20)	9893448	9894992	1544	0.560233	0.0875801	0.0310639	periodic
14	censat_14_46(rnd-6_family-13719,20)	9968887	9971447	2560	10.8906	0.0824283	0.026562	aperiodic
14	bsat_14_16(LSAU-BSAT_Composite,no_beta)	9971447	9974308	2861	2.76442	0.0953077	0.0330904	periodic
14	dhor_14_1(SF02,SF2)	10067391	10092112	24721	6.43057	0.0850042	0.0315608	periodic
14	hor_14_3(S2C14/22H1L)	10092112	12708411	2616299	0.0999622	0.0824283	0.033636	periodic
14	dhor_14_2(SF2,SF02)	12708411	12740173	31762	5.42381	0.0875801	0.0307378	periodic
14	mon_14_18	12740173	12783540	43367	5.55669	0.0875801	0.0283429	aperiodic
14	censat_14_47(CER)	12923915	13047417	123502	1.08244	0.118491	0.0289041	aperiodic
14	censat_14_48(rnd-1_family-0)	13088420	13094623	6203	10.9894	0.105611	0.0559134	periodic
14	mon_14_19	13355135	13356143	1008	1.10913	0.0875801	0.0279561	aperiodic
14	gsat_14_7(GSATII)	13470156	13472675	2519	32.4403	0.100459	0.0301653	periodic
14	censat_14_49(rnd-1_family-0)	13472675	13483436	10761	12.6882	0.105611	0.0544279	periodic
14	censat_14_50(rnd-1_family-0)	13544095	13553224	9129	0.0709826	0.105611	0.0555629	periodic
14	gsat_14_8(GSATII)	13553224	13556145	2921	0.0130092	0.100459	0.0299147	periodic
14	mon_14_20	13670135	13671143	1008	3.17163	0.0875801	0.0286193	aperiodic
15	tar_15_1	0	6007	6007	0.836691	0.329713	0.0639611	aperiodic
15	censat_15_1(ACRO_composite)	69641	161466	91825	3.35586	0.0927318	0.0506879	periodic
15	censat_15_2(rnd-1_family-0)	161973	164114	2141	0.0373657	0.105611	0.0493161	periodic
15	gsat_15_1(GSATII/TAR)	164142	170289	6147	11.556	0.100459	0.0287062	aperiodic
15	censat_15_3(SATR)	187614	191464	3850	0.106494	0.0901559	0.0250153	aperiodic
15	hsat3_15_1(A4)	331905	354553	22648	0.36745	0.0875801	0.0272518	aperiodic
15	bsat_15_1(LSAU-BSAT_Composite)	354553	1097810	743257	0.0753508	0.0798524	0.0359786	aperiodic
15	hsat3_15_2(B4)	1097810	1236149	138339	0.287352	0.0901559	0.029418	periodic
15	hsat1_15_1(HSat1A)	1236149	1533887	297738	0.00253579	0.118491	0.0834063	periodic
15	bsat_15_2(LSAU-BSAT_Composite)	1533887	1560853	26966	0.0388638	0.0824283	0.034253	periodic
15	hsat3_15_3(A4,A2,B3)	1560853	1664622	103769	0.301477	0.0850042	0.0262689	aperiodic
15	censat_15_4(CER)	1775887	1777311	1424	10.1496	0.0901559	0.0250339	aperiodic
15	hsat5_15_1(HSat5)	1777311	1778560	1249	4.26101	0.105611	0.0296791	periodic
15	hsat5_15_2(HSat5)	1782164	1783533	1369	0.601169	0.0901559	0.0287345	aperiodic
15	censat_15_5(SATR)	1836850	1838985	2135	10.6623	0.0927318	0.0276708	aperiodic
15	censat_15_6(SATR)	1841907	1845474	3567	0.359966	0.0901559	0.025647	aperiodic
15	censat_15_7(ACRO_composite)	1870275	2058686	188411	1.36041	0.0927318	0.0489802	periodic
15	censat_15_8(CER)	2075682	2164545	88863	3.50062	0.0927318	0.0251192	aperiodic
15	gsat_15_2(GSATII)	2188255	2190896	2641	0.181749	0.103035	0.028284	aperiodic
15	bsat_15_3	2196050	2208273	12223	3.19987	0.0824283	0.0277372	aperiodic
15	bsat_15_4	2375935	2388410	12475	2.80417	0.0953077	0.0284304	aperiodic
15	rDNA_15_1	2506442	4707485	2201043	11533	0.0978836	0.0264972	aperiodic
15	censat_15_9(ACRO_composite)	4707485	4715610	8125	1.4176	0.0927318	0.0420592	periodic
15	censat_15_10(rnd-1_family-0)	4748438	4757491	9053	0.0942229	0.105611	0.0538374	periodic
15	gsat_15_3(GSATII/TAR)	4757491	4764748	7257	9.17335	0.103035	0.0313702	periodic
15	censat_15_11(SATR)	4789157	4793009	3852	0.130062	0.0901559	0.0254509	aperiodic
15	censat_15_12(SATR)	4795938	4797985	2047	10.9248	0.0953077	0.0265372	aperiodic
15	hsat5_15_3(HSat5)	4843967	4845202	1235	1.48259	0.108187	0.0294428	periodic
15	censat_15_13(CER)	4845202	4846912	1710	0.694737	0.04379	0.0283684	aperiodic
15	hsat3_15_4(A4)	4953627	4987006	33379	0.575392	0.0798524	0.0267621	aperiodic
15	bsat_15_5(LSAU-BSAT_Composite)	4987006	5151806	164800	0.0861893	0.0978836	0.0338143	periodic
15	hsat1_15_2(HSat1A)	5151806	5158321	6515	0.00874904	0.118491	0.075267	periodic
15	hsat3_15_5(B3,A1)	5158321	5251163	92842	0.0902932	0.0850042	0.0296813	periodic
15	bsat_15_6	5300649	5316064	15415	0.0204995	0.0772765	0.0342287	aperiodic
15	hsat3_15_6(A4)	5316064	5327443	11379	1.03032	0.0721248	0.0264471	aperiodic
15	hsat1_15_3(HSat1B,A))	5527068	5975856	448788	0.0326078	0.105611	0.0303097	periodic
15	hsat3_15_7(A5,A2)	5975856	13968808	7992952	0.0169872	0.103035	0.0285668	aperiodic
15	mon_15_1	13968808	14132447	163639	2.46739	0.0927318	0.030212	periodic
15	hsat3_15_8(A4)	14132447	14190845	58398	0.466711	0.0850042	0.0266787	aperiodic
15	mon_15_2	14190845	14245420	54575	4.19199	0.0901559	0.027938	aperiodic
15	hsat3_15_9(A4)	14245420	14256873	11453	0.162665	0.0747006	0.0248652	aperiodic
15	mon_15_3	14256873	14347478	90605	3.87887	0.0927318	0.0297541	periodic
15	hsat3_15_10(A4)	14347478	14359426	11948	0.61391	0.0824283	0.0267917	aperiodic
15	mon_15_4	14359426	14431199	71773	2.52719	0.0927318	0.0290544	periodic
15	bsat_15_7(LSAU-BSAT_Composite,no_beta)	14556514	14558671	2157	6.29393	0.110763	0.0332308	periodic
15	censat_15_14(rnd-6_family-13719,20)	14558671	14561972	3301	4.56104	0.0824283	0.0282906	aperiodic
15	censat_15_15(rnd-6_family-13719,20)	14640870	14642336	1466	0.857435	0.0824283	0.0286182	aperiodic
15	bsat_15_8(LSAU-BSAT_Composite,no_beta)	14642336	14650039	7703	0.51058	0.0901559	0.0311469	periodic
15	mon_15_5	14674291	14750851	76560	6.76136	0.0927318	0.0291911	periodic
15	hsat3_15_11(A4)	14750851	14776838	25987	0.230269	0.0927318	0.0281034	aperiodic
15	bsat_15_9(LSAU-BSAT_Composite,no_beta)	14924602	14926795	2193	11.3995	0.110763	0.032927	periodic
15	censat_15_16(rnd-6_family-13719,20)	14926795	14930017	3222	5.18218	0.103035	0.0286297	aperiodic
15	mon_15_6	14938892	14990182	51290	4.02652	0.0927318	0.0302207	periodic
15	censat_15_17(rnd-6_family-13719,20)	15061026	15062219	1193	0.554904	0.0824283	0.0311294	periodic
15	bsat_15_10(LSAU-BSAT_Composite,no_beta)	15062219	15069957	7738	0.5168	0.0901559	0.0311085	periodic
15	mon_15_7	15098161	15219741	121580	4.71306	0.0927318	0.0292489	periodic
15	hsat3_15_12(A4)	15219741	15402797	183056	0.0390864	0.0901559	0.0275322	aperiodic
15	mon_15_8	15402797	15415981	13184	9.8505	0.0901559	0.0301095	periodic
15	hor_15_1(S4C15H3-B)	15415981	15493810	77829	0.127266	0.0901559	0.0323045	periodic
15	hor_15_2(S4C15H3-A)	15493810	15692696	198886	0.108876	0.0901559	0.0330534	periodic
15	mon_15_9	15692696	15764130	71434	2.79906	0.0927318	0.0300339	periodic
15	hsat3_15_13(A4)	15764130	15782418	18288	0.390693	0.0772765	0.0254697	aperiodic
15	mon_15_10	15782418	15828677	46259	1.52098	0.0927318	0.0301609	periodic
15	hsat3_15_14(A4)	15828677	15874563	45886	0.283071	0.0798524	0.0263294	aperiodic
15	mon_15_11	15874563	15996634	122071	2.64561	0.0901559	0.0295399	periodic
15	hor_15_3(S4C15H2)	15996634	16555605	558971	0.212761	0.0901559	0.0354121	periodic
15	censat_15_18(rnd-6_family-13719,20)	16606151	16608673	2522	10.4814	0.110763	0.028984	aperiodic
15	dhor_15_1(SF02,SF2)	16664460	16678794	14334	19.6374	0.0875801	0.0303241	periodic
15	hor_15_4(S2C15H1L)	16678794	17694466	1015672	0.374628	0.115915	0.0309696	periodic
15	mon_15_12	17694466	17742478	48012	7.57154	0.0901559	0.0272962	aperiodic
15	censat_15_19(CER)	17742478	17742569	91	26.5495	0.0463659	0.0305038	aperiodic
15	censat_15_20(rnd-6_family-4384)	17802623	17803085	462	0.993506	0.0540936	0.0472455	aperiodic
15	censat_15_21(rnd-6_family-4384)	17847229	17848649	1420	1.54296	0.0515177	0.0454083	aperiodic
15	censat_15_22(TGGCTTGGCn)	18004794	18015058	10264	0.113114	0.108187	0.0399518	periodic
15	censat_15_23(NovelTandem)	20712066	20733976	21910	4.22738	0.0566695	0.0330796	aperiodic
15	mon_15_13	22489670	22489964	294	0	0.066973	0.0323874	aperiodic
16	censat_16_1(rnd-1_family-1)	32625033	32626021	988	0	0.0875801	0.0282946	aperiodic
16	bsat_16_1	32652620	32652865	245	0	0.0850042	0.0249558	aperiodic
16	censat_16_2(rnd-6_family-4384)	32665872	32666160	288	0.524306	0.0927318	0.0468904	periodic
16	censat_16_3(TGGCTTGGCn)	32669334	32702325	32991	0.836046	0.108187	0.0395714	periodic
16	censat_16_4(CATCTn)	32747526	32751486	3960	0.335354	0.0824283	0.0364505	periodic
16	censat_16_5(rnd-6_family-4384)	32894438	32894883	445	5.54607	0.0540936	0.0414165	aperiodic
16	mon_16_1	32897683	33006667	108984	0.972234	0.0901559	0.0309036	periodic
16	hsat1_16_1(HSat1B)	33014571	33014778	207	0	0.115915	0.0254094	aperiodic
16	censat_16_6(rnd-6_family-4384)	33065531	33065832	301	0.372093	0.0927318	0.0555453	periodic
16	bsat_16_2	33078458	33078704	246	0	0.0927318	0.0331352	periodic
16	censat_16_7(rnd-1_family-1)	33105288	33106276	988	1.00304	0.0850042	0.0273729	aperiodic
16	censat_16_8(rnd-6_family-4384)	33225114	33225935	821	8.69793	0.0515177	0.0451831	aperiodic
16	censat_16_9(rnd-6_family-4384)	33254078	33256757	2679	1.43598	0.0927318	0.040167	periodic
16	censat_16_10(rnd-6_family-4384)	33437708	33438331	623	0.841091	0.0927318	0.0582154	periodic
16	censat_16_11(rnd-6_family-4384)	33472263	33473264	1001	2.996	0.0515177	0.0418603	aperiodic
16	censat_16_12(rnd-1_family-1)	33592843	33593831	988	0	0.0850042	0.027428	aperiodic
16	bsat_16_3	33620415	33620661	246	0	0.0772765	0.0233825	aperiodic
16	censat_16_13(rnd-6_family-4384)	33633298	33633609	311	0.485531	0.0927318	0.0418633	periodic
16	censat_16_14(TGGCTTGGCn)	33636789	33669365	32576	1.06735	0.105611	0.0423563	periodic
16	censat_16_15(CATCTn)	33714217	33718199	3982	0.369412	0.0798524	0.0385675	aperiodic
16	censat_16_16(rnd-6_family-4384)	33945143	33945332	189	1.04762	0.0798524	0.0406934	aperiodic
16	censat_16_17(rnd-6_family-4384)	34181766	34182371	605	0.449587	0.0927318	0.0562548	periodic
16	censat_16_18(rnd-6_family-4384)	34216319	34217388	1069	2.52011	0.0515177	0.0407311	aperiodic
16	censat_16_19(rnd-1_family-1)	34338858	34339846	988	0	0.0875801	0.0282262	aperiodic
16	bsat_16_4	34366440	34366686	246	0	0.0901559	0.0298236	periodic
16	censat_16_20(rnd-6_family-4384)	34379686	34379976	290	0.52069	0.0927318	0.0546389	periodic
16	hsat1_16_2(HSat1B)	34431452	34431659	207	0	0.0643971	0.0271597	aperiodic
16	mon_16_2	34439565	34577605	138040	0.863518	0.0901559	0.030388	periodic
16	censat_16_21(TGGCCCn)	34725219	34731720	6501	38.0423	0.0850042	0.0313167	periodic
16	censat_16_22(GCCAAGCCAn,A-rich)	34776668	34779228	2560	2.60391	0.105611	0.0312115	periodic
16	mon_16_3	34813748	34815594	1846	0.179307	0.0824283	0.0314031	periodic
16	censat_16_23(TGGCTTGGCn)	34824062	34827380	3318	0.108499	0.110763	0.0386601	periodic
16	censat_16_24(CATCTn)	34850231	34853968	3737	0.351887	0.0824283	0.0359739	periodic
16	censat_16_25(rnd-6_family-4384)	35342872	35343073	201	1.24876	0.0901559	0.0448422	periodic
16	censat_16_26(rnd-6_family-4384)	35586973	35587482	509	1.06483	0.0927318	0.0441801	periodic
16	censat_16_27(rnd-6_family-4384)	35622336	35623355	1019	1.32287	0.0927318	0.0725062	periodic
16	hsat3_16_1(A4)	35634414	35643986	9572	0.495508	0.0747006	0.0244303	aperiodic
16	hsat2_16_1(B)	35643986	35644992	1006	0.402584	0.30653	0.044425	aperiodic
16	hsat3_16_2(A4)	35644992	35645995	1003	1.59621	0.113339	0.0294773	periodic
16	hsat2_16_2(B)	35645995	35649005	3010	0.00697674	0.30653	0.0803991	aperiodic
16	hsat3_16_3(A4)	35649005	35650995	1990	0.682412	0.113339	0.0272908	aperiodic
16	hsat2_16_3(B)	35650995	35662994	11999	0.0601717	0.303954	0.0608731	aperiodic
16	hsat3_16_4(A4)	35662994	35663995	1001	0.619381	0.108187	0.0236977	aperiodic
16	hsat2_16_4(B)	35663995	35673994	9999	0.010401	0.115915	0.0642052	periodic
16	hsat3_16_5(A4)	35673994	35677618	3624	0.584437	0.0695489	0.023078	aperiodic
16	mon_16_4	35677618	35696235	18617	2.13418	0.0927318	0.0276929	aperiodic
16	censat_16_28(rnd-6_family-13719,20)	35710518	35711999	1481	0.557056	0.0901559	0.0320571	periodic
16	bsat_16_5(LSAU-BSAT_Composite,no_beta)	35711999	35720670	8671	0.794603	0.0927318	0.0307374	periodic
16	mon_16_5	35743653	35794951	51298	5.04731	0.0927318	0.0298434	periodic
16	dhor_16_1(S02CMH2d)	35794951	35828954	34003	3.3607	0.0901559	0.0317495	periodic
16	dhor_16_2(S2CMH4d)	35828954	35831856	2902	0.15093	0.0850042	0.0331144	periodic
16	dhor_16_3(SF2)	35831856	35834066	2210	0.123982	0.0901559	0.0265318	aperiodic
16	hor_16_1(S2C16H2-A)	35834066	35841873	7807	0.159088	0.115915	0.0282531	aperiodic
16	hor_16_2(S2C16H2-A)	35844950	35848286	3336	0.157074	0.0850042	0.0301356	periodic
16	hor_16_3(S1C16H1L,S1C1/5/19H1L)	35848286	35854528	6242	0.0286767	0.0901559	0.0349484	periodic
16	hor_16_4(S1C16H1L)	35854528	37793352	1938824	0.0933421	0.0875801	0.0344209	periodic
16	hor_16_5(S1C16H1L,S1C1/5/19H1L)	37793352	37829521	36169	0.00998092	0.0875801	0.0354213	periodic
16	hor_16_6(S2C16H2-B,A)	37829521	37841225	11704	0.518797	0.0901559	0.0309831	periodic
16	hor_16_7(S2C16H2-B)	37841225	37851967	10742	1.46044	0.0850042	0.0321569	periodic
16	dhor_16_4(SF2)	37858009	37863882	5873	0.155627	0.0875801	0.0289066	aperiodic
16	dhor_16_5(S2CMH4d)	37863882	37867244	3362	0.101725	0.0901559	0.0300115	periodic
16	hsat2_16_5(B)	37867244	37892864	25620	0.0112802	0.303954	0.0597077	aperiodic
16	hsat2_16_6(B)	37916494	37952082	35588	0.00556367	0.303954	0.0551148	aperiodic
16	hsat2_16_7(B)	37974678	37997693	23015	0.00521399	0.303954	0.0536033	aperiodic
16	censat_16_29(rnd-6_family-4384)	38014959	38017447	2488	1.19132	0.0953077	0.0404631	periodic
16	mon_16_6	38028998	38213677	184679	3.51324	0.0927318	0.0301331	periodic
16	censat_16_30(SST1_Composite)	38214097	38214897	800	0.08125	0.103035	0.0299088	periodic
16	censat_16_31(SST1_Composite)	38332941	38342053	9112	0	0.100459	0.0302248	periodic
16	mon_16_7	38342360	38373039	30679	1.38603	0.0927318	0.0340273	periodic
16	censat_16_32(5S)	38373039	38382785	9746	0.0456598	0.105611	0.0330967	periodic
16	censat_16_33(5S)	38392323	38394564	2241	0.0553324	0.105611	0.0291909	periodic
16	hsat4_16_1(HSat4)	38394564	38405092	10528	1.36218	0.0901559	0.0539065	periodic
16	hsat4_16_2(HSat4)	38413478	38417827	4349	1.81099	0.0875801	0.062198	periodic
16	mon_16_8	38417827	38432871	15044	6.57112	0.0927318	0.0322045	periodic
16	hsat4_16_3(HSat4)	38432871	38445237	12366	2.68745	0.0875801	0.0552055	periodic
16	mon_16_9	38445237	38479465	34228	2.93698	0.0927318	0.0331806	periodic
16	bsat_16_6	38555940	38573057	17117	1.41579	0.103035	0.0273754	aperiodic
16	censat_16_34(rnd-1_family-1)	38599608	38600382	774	0.0258398	0.0798524	0.0335581	aperiodic
16	bsat_16_7	38630731	38634286	3555	0	0.0798524	0.0268673	aperiodic
16	bsat_16_8	38677908	38680406	2498	0	0.0798524	0.0294152	aperiodic
16	bsat_16_9	38699158	38701304	2146	0	0.105611	0.0298802	periodic
16	bsat_16_10	38756844	38766326	9482	0.0112845	0.100459	0.0289096	aperiodic
16	mon_16_10	38802241	38802346	105	0.0190476	0.118491	0.0376211	periodic
16	bsat_16_11	38820676	38833193	12517	0.90429	0.100459	0.0291998	periodic
16	censat_16_35(SST1_Composite)	38983754	38988702	4948	6.91572	0.105611	0.0267203	aperiodic
16	hsat2_16_8(B)	39166262	39183175	16913	0.00839591	0.118491	0.0565878	periodic
16	censat_16_36(CTTCn)	39186514	39187244	730	4.16575	0.0824283	0.029638	periodic
16	hsat2_16_9(B)	39207315	39237710	30395	0.0103306	0.303954	0.0565998	aperiodic
16	hsat2_16_10(B)	39261510	39275100	13590	0.0058131	0.303954	0.0541445	aperiodic
16	hsat2_16_11(B)	39357045	39396518	39473	0.00846148	0.303954	0.0532747	aperiodic
16	dhor_16_6(S2CMH4d)	39396518	39400256	3738	0.403424	0.115915	0.0329458	periodic
16	hsat2_16_12(B)	39400256	39434363	34107	0.00976339	0.303954	0.0551868	aperiodic
16	hsat2_16_13(B)	39457429	39471987	14558	0.0059074	0.303954	0.055075	aperiodic
16	hsat2_16_14(B)	39496532	39503393	6861	0.00903658	0.303954	0.0558821	aperiodic
16	dhor_16_7(S2CMH4d)	39503393	39523668	20275	0.284636	0.0850042	0.0307436	periodic
16	hsat2_16_15(B)	39523668	52219756	12696088	0.00182631	0.118491	0.0541712	periodic
16	censat_16_37(rnd-6_family-4384)	52223887	52227083	3196	0.172403	0.0927318	0.0361547	periodic
16	hsat2_16_16(B)	52260530	52263389	2859	0	0.303954	0.0612259	aperiodic
17	censat_17_1(rnd-1_family-0)	20527834	20528114	280	0.110714	0.108187	0.0593938	periodic
17	censat_17_2(SST1_Composite)	21521740	21523556	1816	2.81002	0.113339	0.0282006	aperiodic
17	censat_17_3(rnd-1_family-0)	21525118	21525504	386	0	0.108187	0.0656733	periodic
17	censat_17_3(rnd-1_family-0)	21528106	21528300	194	0	0.103035	0.0321565	periodic
17	censat_17_4(rnd-1_family-0)	21602233	21604603	2370	0.0801688	0.105611	0.0612517	periodic
17	censat_17_5(GATGATn)	21612705	21613222	517	0.040619	0.329713	0.0792454	aperiodic
17	censat_17_6(SST1_Composite)	21622145	21636090	13945	2.69487	0.103035	0.0275756	aperiodic
17	censat_17_7(rnd-6_family-4384)	21811486	21815296	3810	0.720735	0.0540936	0.0380715	aperiodic
17	hsat3_17_1(A2)	21822079	21961014	138935	0.349322	0.0875801	0.0256509	aperiodic
17	hsat3_17_2(B1)	21961014	22243817	282803	0.0364777	0.0798524	0.0264842	aperiodic
17	hsat3_17_3(A1)	22243817	22285707	41890	1.883	0.0927318	0.0267633	aperiodic
17	hsat2_17_1(B)	22285707	22293542	7835	0	0.115915	0.0601772	periodic
17	hsat2_17_2(B)	22322414	22398289	75875	0.00797364	0.118491	0.0588186	periodic
17	censat_17_8(rnd-6_family-4384)	22415469	22415696	227	0	0.0798524	0.0367643	aperiodic
17	censat_17_9(rnd-6_family-4384)	22421918	22424953	3035	0.6514	0.0927318	0.0396431	periodic
17	hsat3_17_4(A2)	22431675	22533864	102189	0.34763	0.0824283	0.0256224	aperiodic
17	censat_17_10(rnd-6_family-4384)	22556782	22558028	1246	0.766453	0.0515177	0.05124	aperiodic
17	censat_17_11(rnd-6_family-4384)	22577972	22580070	2098	2.82841	0.0927318	0.043657	periodic
17	censat_17_12(SST1_Composite)	22683125	22694673	11548	2.18488	0.100459	0.0270569	aperiodic
17	censat_17_13(rnd-1_family-0)	22712206	22715282	3076	0.341027	0.105611	0.0614785	periodic
17	mon_17_1	22893753	22926977	33224	1.00012	0.0927318	0.0335017	periodic
17	censat_17_14(SST1_Composite)	22926977	22930914	3937	0.0734061	0.0978836	0.0336798	periodic
17	censat_17_15(rnd-1_family-0)	22955415	22955609	194	0	0.27562	0.0271695	aperiodic
17	censat_17_16(rnd-1_family-0)	22958213	22958601	388	0.0128866	0.108187	0.0650676	periodic
17	censat_17_17(SST1_Composite)	22960167	22967877	7710	3.93671	0.103035	0.0280396	aperiodic
17	censat_17_18(SST1_Composite)	23036430	23101337	64907	0.653658	0.103035	0.0288584	aperiodic
17	mon_17_2	23346722	23356398	9676	2.4691	0.0927318	0.0339006	periodic
17	censat_17_19(SST1_Composite)	23356398	23360051	3653	0.0057487	0.100459	0.0298788	periodic
17	mon_17_3	23360051	23379829	19778	1.27222	0.0901559	0.0315956	periodic
17	censat_17_20(SST1)	23379829	23381519	1690	0.035503	0.103035	0.0353055	periodic
17	censat_17_21(TGATGAn)	23400425	23400936	511	0.146771	0.332289	0.0949176	aperiodic
17	mon_17_4	23407373	23433372	25999	4.3034	0.0927318	0.0300835	periodic
17	hor_17_1(S3C17H1-B)	23433372	23892419	459047	0.0426122	0.0927318	0.0353898	periodic
17	hor_17_2(S3C17H1L)	23892419	27486939	3594520	0.057751	0.0953077	0.0321042	periodic
17	hor_17_3(S3C17H1-C)	27486939	27571319	84380	0.0530694	0.0927318	0.0338232	periodic
17	dhor_17_1(S3C17H2d)	27571319	27576047	4728	0	0.0978836	0.0297087	periodic
17	mon_17_5	27576047	27656567	80520	3.36767	0.0824283	0.0313811	periodic
17	censat_17_22(rnd-6_family-4384)	27669956	27671814	1858	1.66254	0.0953077	0.0312746	periodic
17	censat_17_23(rnd-6_family-4384)	27705372	27706726	1354	2.02363	0.0515177	0.0459427	aperiodic
17	censat_17_24(rnd-6_family-4384)	27711623	27715433	3810	0.710499	0.0515177	0.0376935	aperiodic
17	hsat3_17_5(A2,A4)	27722222	27881606	159384	0.380653	0.0901559	0.0258385	aperiodic
17	mon_17_6	28089293	28093083	3790	0.344327	0.0901559	0.0321445	periodic
17	censat_17_25(SST1_Composite)	28093083	28100210	7127	0.00883962	0.0978836	0.0325317	periodic
17	mon_17_7	28100210	28139193	38983	8.97004	0.0927318	0.0329291	periodic
18	censat_18_1(SST1)	11350790	11351416	626	0.146965	0.0798524	0.0330529	aperiodic
18	gsat_18_1(GSATX)	11465046	11465507	461	0	0.0978836	0.0496657	periodic
18	hsat5_18_1(HSat5)	14413761	14415124	1363	1.66838	0.0978836	0.0283147	aperiodic
18	hsat5_18_2(HSat5)	14497035	14502444	5409	0.576632	0.0850042	0.0306582	periodic
18	censat_18_2(rnd-6_family-4384)	15171686	15171789	103	11.767	0.0566695	0.0371675	aperiodic
18	censat_18_3(rnd-6_family-4384)	15326329	15327876	1547	1.91338	0.0927318	0.0318154	periodic
18	censat_18_4(rnd-6_family-4384)	15358998	15359690	692	3.06647	0.0927318	0.0485102	periodic
18	censat_18_5(CER)	15396506	15407322	10816	2.54863	0.118491	0.0296142	periodic
18	censat_18_6(CER)	15542725	15542847	122	4.2623	0.0772765	0.0222769	aperiodic
18	mon_18_1	15542847	15607616	64769	1.01678	0.0927318	0.0280084	aperiodic
18	dhor_18_1(SF02)	15607616	15611197	3581	0.132086	0.103035	0.0318066	periodic
18	dhor_18_2(S02CMH2d)	15611197	15617513	6316	0.186352	0.0850042	0.0325754	periodic
18	dhor_18_3(S2CMH4d)	15617513	15633403	15890	7.21517	0.0901559	0.0315612	periodic
18	dhor_18_4(SF2)	15633403	15641581	8178	1.35009	0.0875801	0.0352773	periodic
18	hor_18_1(S2C18H2-A)	15641581	15942313	300732	0.391079	0.0927318	0.0315577	periodic
18	hor_18_2(S2C18H2-B,A)	15942313	15962808	20495	2.58648	0.0901559	0.0320519	periodic
18	hor_18_3(S2C18H2-D)	15962808	15966041	3233	0.549644	0.115915	0.0320849	periodic
18	hor_18_4(S2C18H1L,S2C20H2)	15966041	15971633	5592	0.0965665	0.115915	0.0355126	periodic
18	hor_18_5(S2C18H1L)	15971633	20740248	4768615	0.0122082	0.115915	0.0360548	periodic
18	hor_18_6(S2C18H1L,S2C20H2)	20740248	20933550	193302	0.0277493	0.115915	0.034558	periodic
18	hor_18_7(S2C18H2-D)	20933550	21015538	81988	0.460592	0.115915	0.032574	periodic
18	hor_18_8(S2C18H2-B,D)	21015538	21024664	9126	1.30879	0.115915	0.0309709	periodic
18	hor_18_9(S2C18H2-B,E)	21024664	21121235	96571	0.58209	0.115915	0.0321586	periodic
18	dhor_18_5(SF2)	21121235	21125454	4219	2.23015	0.0824283	0.034323	periodic
19	hsat5_19_1(HSat5)	19876180	19882478	6298	6.2558	0.103035	0.0294949	periodic
19	hsat5_19_2(HSat5)	19890617	19893987	3370	0	0.13137	0.037584	periodic
19	censat_19_1(NovelTandem)	21004104	21054306	50202	1.61348	0.0798524	0.0324493	aperiodic
19	bsat_19_1	21105598	21111981	6383	7.09055	0.103035	0.0284831	aperiodic
19	bsat_19_2	21624311	21637430	13119	18.8879	0.0927318	0.0287711	aperiodic
19	bsat_19_3	21731822	21736438	4616	3.43111	0.0798524	0.0258851	aperiodic
19	bsat_19_4	21977380	21989700	12320	14.6154	0.103035	0.0273561	aperiodic
19	bsat_19_5	22012547	22018610	6063	3.95761	0.0927318	0.0290904	periodic
19	bsat_19_6	22028914	22031730	2816	0.0159801	0.0927318	0.0281043	aperiodic
19	bsat_19_7	22038462	22041401	2939	0.0408302	0.0772765	0.0275412	aperiodic
19	bsat_19_8	22043987	22050016	6029	1.95455	0.0875801	0.0278487	aperiodic
19	bsat_19_9	22053634	22062685	9051	1.35178	0.0927318	0.0273102	aperiodic
19	bsat_19_10	22065310	22075423	10113	0.0104816	0.103035	0.027506	aperiodic
19	bsat_19_11	22164092	22175070	10978	2.20878	0.0978836	0.0297568	periodic
19	bsat_19_12	22178122	22188795	10673	2.09266	0.0953077	0.0287871	aperiodic
19	bsat_19_13	22271329	22276297	4968	0.0169082	0.0901559	0.0286447	aperiodic
19	bsat_19_14	22377219	22385532	8313	8.54794	0.0953077	0.0282317	aperiodic
19	bsat_19_15	22391079	22399428	8349	2.75901	0.0978836	0.0291014	periodic
19	bsat_19_16	22461811	22490951	29140	4.19423	0.0824283	0.0276962	aperiodic
19	bsat_19_17	22852336	22879231	26895	6.57457	0.100459	0.0275996	aperiodic
19	bsat_19_18	22951010	22968769	17759	6.11921	0.103035	0.0285847	aperiodic
19	bsat_19_19	23056259	23079454	23195	6.65945	0.100459	0.0277256	aperiodic
19	bsat_19_20	23155143	23166589	11446	3.11847	0.0978836	0.0275576	aperiodic
19	bsat_19_21	23178466	23204645	26179	11.219	0.100459	0.0280974	aperiodic
19	bsat_19_22	23230233	23238415	8182	7.31606	0.100459	0.0289179	aperiodic
19	bsat_19_23	23390230	23399433	9203	10.3875	0.0978836	0.0287957	aperiodic
19	bsat_19_24	23440971	23457313	16342	2.90889	0.0850042	0.0276157	aperiodic
19	censat_19_2(CTCn,TATAn)	23457313	23462446	5133	0.168128	0.0901559	0.030653	periodic
19	bsat_19_25	23537413	23546119	8706	5.25936	0.0875801	0.0279287	aperiodic
19	bsat_19_26	23595709	23602749	7040	0.466903	0.0772765	0.0274987	aperiodic
19	censat_19_3(CTCn,TATAn)	23602749	23609510	6761	2.76128	0.0978836	0.0268252	aperiodic
19	bsat_19_27	23659735	23664970	5235	7.14327	0.0953077	0.0274599	aperiodic
19	bsat_19_28	23667968	23671523	3555	12.6695	0.0850042	0.0266216	aperiodic
19	bsat_19_29	23680190	23687025	6835	8.49612	0.100459	0.0281737	aperiodic
19	bsat_19_30	23698636	23705407	6771	12.3951	0.0978836	0.0271914	aperiodic
19	mon_19_1	23800706	23800807	101	0.376238	0.105611	0.0360738	periodic
19	bsat_19_31	23828034	23828541	507	0.433925	0.0798524	0.0339647	aperiodic
19	bsat_19_32	23909619	23930466	20847	10.2833	0.0953077	0.0274563	aperiodic
19	bsat_19_33	24033861	24054350	20489	12.3408	0.0927318	0.029325	periodic
19	bsat_19_34	24121675	24142354	20679	1.97543	0.0850042	0.0270552	aperiodic
19	bsat_19_35	24197040	24224098	27058	18.2019	0.0901559	0.0278471	aperiodic
19	bsat_19_36	24331901	24347983	16082	3.41637	0.0901559	0.0287083	aperiodic
19	mon_19_2	24352656	24570766	218110	2.7839	0.0927318	0.0298832	periodic
19	hor_19_1(S5C5/19H4-A)	24570766	24655575	84809	0.153545	0.0798524	0.03257	aperiodic
19	hor_19_2(S5C5/19H4-B)	24655575	25214335	558760	0.53686	0.0824283	0.0296463	periodic
19	hor_19_3(S5C5/19H4-A)	25214335	25231037	16702	0.173572	0.0798524	0.0322295	aperiodic
19	mon_19_3	25231037	25268012	36975	6.09374	0.0824283	0.0305405	periodic
19	dhor_19_1(S5C5/19H9d)	25268012	25302775	34763	4.16549	0.0824283	0.0332041	periodic
19	dhor_19_2(S5C1H5d)	25302775	25305836	3061	0.00653381	0.0927318	0.0326609	periodic
19	hor_19_4(S5C5/19H7-A,B)	25305836	25329854	24018	0.0623283	0.0927318	0.0325993	periodic
19	hor_19_5(S5C5/19H7-A)	25329854	25540889	211035	0.125349	0.0927318	0.0310916	periodic
19	hor_19_6(S5C5/19H7-A,B)	25540889	25621289	80400	0.112575	0.0927318	0.0336356	periodic
19	dhor_19_3(SF5)	25621289	25649842	28553	1.07159	0.0927318	0.0355164	periodic
19	dhor_19_4(S02CMH2d)	25649842	25662269	12427	7.24664	0.0850042	0.0319856	periodic
19	dhor_19_5(SF3)	25662269	25664815	2546	0	0.0927318	0.0336694	periodic
19	dhor_19_6(S02CMH2d)	25664815	25672228	7413	0.164711	0.0824283	0.0333298	periodic
19	dhor_19_7(SF5)	25672228	25684039	11811	0.270003	0.0927318	0.0332244	periodic
19	hor_19_7(S5C5/19H5,S5C5H6)	25690098	25698948	8850	0.14678	0.0927318	0.0321696	periodic
19	hor_19_8(S5C5/19H5)	25698948	25740136	41188	0.508522	0.0953077	0.0335816	periodic
19	mon_19_4	25740136	25800914	60778	1.64513	0.0901559	0.0290246	periodic
19	dhor_19_8(S1CMH3d)	25800914	25818021	17107	0.00385807	0.0850042	0.0344181	periodic
19	hor_19_9(S1C5H2)	25818021	25821757	3736	0.00535332	0.0875801	0.0346928	periodic
19	hor_19_10(S1C1/5/19H1L,S1C16H1L)	25821757	25826338	4581	0.0207378	0.0901559	0.0319041	periodic
19	hor_19_11(S1C5H2)	25826338	25828205	1867	0.011248	0.0850042	0.036711	periodic
19	hor_19_12(S1C1/5/19H1L,S1C16H1L)	25828205	25832447	4242	0.0117869	0.0901559	0.0331838	periodic
19	hor_19_13(S1C1/5/19H1L)	25832447	29749519	3917072	0.0143572	0.115915	0.0347001	periodic
19	hor_19_14(S1C1/5/19H1L,S1C16H1L,S1CMH3d)	29749519	29769351	19832	0.00100847	0.0875801	0.0356891	periodic
19	mon_19_5	29769351	30152526	383175	2.13018	0.0927318	0.0296593	periodic
19	hsat4_19_1(HSat4)	30152526	30179279	26753	8.52443	0.0901559	0.0470239	periodic
19	mon_19_6	30179279	30188161	8882	0.070367	0.0901559	0.0321176	periodic
19	hsat4_19_2(HSat4)	30188161	30199272	11111	3.30051	0.0875801	0.0551195	periodic
19	mon_19_7	30199272	30208025	8753	0.113333	0.113339	0.0334591	periodic
19	hsat4_19_3(HSat4)	30208025	30213745	5720	0.0403846	0.0875801	0.0546721	periodic
19	mon_19_8	30213745	30234800	21055	8.68079	0.0953077	0.0295167	periodic
19	hsat4_19_4(HSat4)	30234800	30239717	4917	0	0.0875801	0.0597834	periodic
19	mon_19_9	30239717	30261059	21342	0.303767	0.0953077	0.0329432	periodic
19	hsat4_19_5(HSat4)	30261059	30273600	12541	0.213619	0.0875801	0.0584708	periodic
19	hsat4_19_6(HSat4)	30279235	30299402	20167	0.820499	0.0875801	0.0605549	periodic
19	hsat4_19_7(HSat4)	30381631	30382355	724	1.1547	0.0901559	0.0466796	periodic
19	hsat4_19_8(HSat4)	30388554	30396484	7930	9.81337	0.0901559	0.0483062	periodic
1	censat_1_1(rnd-6_family-4384)	121405145	121406286	1141	7.25416	0.0515177	0.0462906	aperiodic
1	hor_1_1(S3C1H2-A,B,C)	121619169	121625213	6044	1.14676	0.0927318	0.032447	periodic
1	hor_1_2(S3C1H2-A,B)	121625213	121667941	42728	1.32618	0.0978836	0.0333332	periodic
1	hor_1_3(S3C1H2-B)	121667941	121788213	120272	1.68197	0.0953077	0.0330424	periodic
1	hor_1_4(S3C1H2-A)	121790362	121796048	5686	0.929476	0.0978836	0.0327442	periodic
1	hor_1_5(S1C1/5/19H1L)	121796048	126300487	4504439	0.0430329	0.113339	0.0307663	periodic
1	hor_1_6(S3C1H2-A)	126300487	126590802	290315	0.729928	0.0953077	0.0337276	periodic
1	hor_1_7(S3C1H2-C,D)	126590802	126611405	20603	0.137601	0.0978836	0.0356186	periodic
1	hor_1_8(S3C1H2-D)	126611405	126633161	21756	0.439603	0.0953077	0.0362833	periodic
1	hor_1_9(S3C1H2-C)	126633161	126701150	67989	5.61457	0.0953077	0.0348886	periodic
1	dhor_1_1(S5C1H4d)	126701150	126755779	54629	2.16581	0.0927318	0.0334879	periodic
1	dhor_1_2(S5C1H5d)	126755779	126786879	31100	7.88167	0.0927318	0.0311671	periodic
1	dhor_1_3(S5C1H6d)	126786879	126802930	16051	1.93938	0.0824283	0.0311337	periodic
1	dhor_1_4(S5C1H5d)	126802930	126824128	21198	0.234881	0.0927318	0.0312532	periodic
1	censat_1_2(SST1_Composite)	126824128	126828704	4576	1.7111	0.108187	0.0259156	aperiodic
1	hsat2_1_1(B)	126828704	126838321	9617	0.0206925	0.303954	0.0582769	aperiodic
1	hsat2_1_2(B)	126840458	126846306	5848	0	0.118491	0.0551899	periodic
1	censat_1_3(rnd-6_family-4384)	126846306	126848989	2683	3.46701	0.0515177	0.0464436	aperiodic
1	censat_1_4(rnd-6_family-4384)	126877724	126880325	2601	1.32218	0.0927318	0.0340023	periodic
1	hsat2_1_3(A1,B)	126907665	127500101	592436	0.0039768	0.118491	0.0495854	periodic
1	hsat3_1_1(B3)	127500101	127715077	214976	0.333428	0.0901559	0.0295447	periodic
1	censat_1_5(CER)	127754463	127758832	4369	9.74868	0.04379	0.0269227	aperiodic
1	hsat5_1_1(HSAT5)	127758832	127760085	1253	3.89944	0.103035	0.0298441	periodic
1	censat_1_6(ACRO_Composite)	127766517	127772418	5901	1.89137	0.0927318	0.0498208	periodic
1	gsat_1_1(GSATII)	127772418	127775625	3207	0.119738	0.0978836	0.0282061	aperiodic
1	censat_1_7(SATR1)	127800809	127804664	3855	0.103761	0.0875801	0.0254733	aperiodic
1	censat_1_8(SATR1)	127807588	127809727	2139	8.02665	0.0953077	0.0277442	aperiodic
1	hsat5_1_2(HSat5)	127862755	127864134	1379	1.82814	0.103035	0.0291864	periodic
1	hsat5_1_3(HSat5)	127881255	127883385	2130	0.514554	0.103035	0.0284194	aperiodic
1	hsat5_1_4(HSat5)	127895876	127897129	1253	1.29769	0.105611	0.0294546	periodic
1	censat_1_9(CER)	127897129	127898505	1376	0.497093	0.0875801	0.024477	aperiodic
1	hsat3_1_2(B3,A4)	128009850	128098615	88765	0.0704895	0.0824283	0.0285949	aperiodic
1	bsat_1_1(LSAU-BSAT_Composite)	128098615	128594818	496203	0.117105	0.0978836	0.0337279	periodic
1	hsat3_1_3(A4,A2)	128594818	128734874	140056	0.206882	0.0850042	0.0267739	aperiodic
1	hsat2_1_4(B,A1,A2)	128734874	128783775	48901	0.00253574	0.118491	0.0496399	periodic
1	censat_1_10(rnd-6_family-4384)	128800795	128803475	2680	1.18619	0.0927318	0.0370251	periodic
1	censat_1_11(rnd-6_family-4384)	128837036	128837233	197	12.5076	0.0978836	0.0477303	periodic
1	hsat2_1_5(B)	128876917	128901447	24530	0.00648186	0.118491	0.0569304	periodic
1	censat_1_12(rnd-6_family-4384)	128920455	128923144	2689	1.54109	0.0540936	0.0353543	aperiodic
1	censat_1_13(rnd-6_family-4384)	128947979	128950883	2904	2.28753	0.0515177	0.0506208	aperiodic
1	censat_1_14(rnd-6_family-4384)	128984411	128987091	2680	0.783955	0.0927318	0.0387674	periodic
1	hsat2_1_6(A2,A1,B)	129004109	142242033	13237924	0.000994114	0.30653	0.0510897	aperiodic
1	censat_1_15(rnd-6_family-4384)	142280930	142286351	5421	2.91016	0.0515177	0.0491591	aperiodic
1	censat_1_16(rnd-6_family-4384)	142307777	142310837	3060	3.25817	0.0515177	0.0422312	aperiodic
1	censat_1_17(rnd-6_family-4384)	142569057	142570746	1689	4.84369	0.0515177	0.0444838	aperiodic
1	hsat2_1_7(B)	142610609	142613454	2845	1.44886	0.118491	0.0596023	periodic
1	censat_1_18(rnd-6_family-4384)	143148263	143150141	1878	7.83227	0.0515177	0.042718	aperiodic
1	censat_1_19(rnd-6_family-4384)	143423529	143424993	1464	5.71038	0.0515177	0.0507301	aperiodic
1	censat_1_20(rnd-6_family-4384)	143742419	143743494	1075	3.02233	0.0515177	0.0489718	aperiodic
1	censat_1_21(rnd-6_family-4384)	144007117	144008994	1877	2.81673	0.0515177	0.0435126	aperiodic
20	censat_20_1(rnd-1_family-0)	25835813	25838864	3051	0.0498197	0.105611	0.0660205	periodic
20	censat_20_2(SST1_Composite)	25856576	25873890	17314	3.9687	0.100459	0.0279947	aperiodic
20	mon_20_1	25969294	25979247	9953	1.26133	0.0927318	0.0349051	periodic
20	censat_20_3(SST1)	25979247	25983557	4310	0.12529	0.105611	0.0311569	periodic
20	mon_20_2	25983557	25987435	3878	0.0866426	0.0953077	0.0330781	periodic
20	censat_20_4(SST1_Composite)	25987435	25996401	8966	0.768347	0.100459	0.0283824	aperiodic
20	censat_20_5(SST1_Composite)	26059067	26068845	9778	1.96083	0.100459	0.0268157	aperiodic
20	censat_20_6(rnd-1_family-0)	26086806	26089932	3126	0.439539	0.105611	0.0632835	periodic
20	censat_20_7(SST1_Composite)	26254237	26255521	1284	0.119159	0.0953077	0.0294254	periodic
20	censat_20_8(SST1_Composite)	26280174	26281860	1686	0.674377	0.113339	0.0272278	aperiodic
20	mon_20_3	26281860	26318020	36160	2.61007	0.0824283	0.0316676	periodic
20	dhor_20_1(SF02)	26318020	26332347	14327	0.191736	0.103035	0.0313473	periodic
20	dhor_20_2(S02CMH2d)	26332347	26336314	3967	0.139148	0.0927318	0.0343607	periodic
20	dhor_20_3(SF01)	26336314	26341078	4764	0.121537	0.0798524	0.0370124	aperiodic
20	dhor_20_4(S02CMH2d)	26343418	26356678	13260	0.0711161	0.0901559	0.0336808	periodic
20	dhor_20_5(SF2)	26356678	26363662	6984	0.204467	0.110763	0.0318254	periodic
20	dhor_20_6(S2C20H5d)	26363662	26383658	19996	0.15213	0.115915	0.0332921	periodic
20	hor_20_1(S2C20H2)	26383658	26925852	542194	0.686752	0.115915	0.0357298	periodic
20	hor_20_2(S2C20H1L)	26925852	29099655	2173803	0.0299521	0.113339	0.0331624	periodic
20	hor_20_3(S02C20H3)	29099655	29521051	421396	0.0692508	0.0824283	0.0360742	periodic
20	bsat_20_1(LSAU-BSAT_Composite,no_beta)	29615123	29617314	2191	10.9128	0.108187	0.0311137	periodic
20	censat_20_9(rnd-6_family-13719,20)	29617913	29620489	2576	5.80745	0.0798524	0.029061	aperiodic
20	censat_20_10(rnd-6_family-13719,20)	29695615	29697052	1437	0.784273	0.0875801	0.0285772	aperiodic
20	bsat_20_2(LSAU-BSAT_Composite,no_beta)	29697052	29704793	7741	0.410154	0.0927318	0.0319945	periodic
20	mon_20_4	29728546	29834683	106137	4.3014	0.0901559	0.0303396	periodic
20	hsat3_20_1(A4)	29834683	29848541	13858	1.49192	0.0747006	0.0260407	aperiodic
20	mon_20_5	29848541	29953429	104888	2.81522	0.0901559	0.0291464	periodic
20	censat_20_11(ACRO_composite)	29985935	29993791	7856	0.479888	0.0927318	0.0422353	periodic
20	hsat5_20_1(HSat5)	30084282	30089613	5331	0.629901	0.0953077	0.0307324	periodic
20	hsat5_20_2(HSat5)	30101853	30104076	2223	0.439946	0.105611	0.0292529	periodic
20	hsat5_20_3(HSat5)	30124536	30125904	1368	0.472953	0.103035	0.0308082	periodic
20	censat_20_12(SATR)	30207383	30209520	2137	5.85494	0.0978836	0.0234668	aperiodic
20	censat_20_13(SATR)	30212432	30216278	3846	0.24701	0.0875801	0.0247174	aperiodic
20	censat_20_14(rnd-1_family-0)	30234796	30241322	6526	11.8466	0.105611	0.0534545	periodic
20	censat_20_15(CTGGCCn)	30253584	30259743	6159	1.66683	0.103035	0.029002	periodic
20	censat_20_16(rnd-6_family-13719,20)	30355467	30358087	2620	14.6908	0.0824283	0.0281609	aperiodic
20	bsat_20_3(LSAU-BSAT_Composite,no_beta)	30358087	30360955	2868	2.73989	0.0953077	0.0300668	periodic
20	censat_20_17(SST1_Composite)	30458423	30460154	1731	0.660312	0.103035	0.0321475	periodic
20	censat_20_18(SST1_Composite)	30509640	30515714	6074	3.37076	0.100459	0.0310511	periodic
20	mon_20_6	30515714	30519604	3890	0.146272	0.0927318	0.030856	periodic
20	censat_20_19(SST1_Composite)	30519604	30523868	4264	0.0286116	0.103035	0.0307569	periodic
20	mon_20_7	30523868	30534385	10517	1.63897	0.0927318	0.0351099	periodic
20	censat_20_20(SST1_Composite)	30626977	30628871	1894	2.15576	0.105611	0.0310203	periodic
20	dhor_20_7(SF5)	30628871	30631971	3100	0.285806	0.0978836	0.0292884	periodic
20	mon_20_8	30631971	30663157	31186	3.86856	0.0824283	0.0301149	periodic
20	hor_20_4(S5C20H6)	30663157	30814141	150984	10.3734	0.0643971	0.0281116	aperiodic
20	mon_20_9	30814141	30924611	110470	3.24474	0.0927318	0.0289034	aperiodic
20	bsat_20_4(LSAU-BSAT_Composite,no_beta)	30949108	30956764	7656	2.57249	0.0927318	0.0308648	periodic
20	censat_20_21(rnd-6_family-13719,20)	30956764	30958281	1517	1.10877	0.0850042	0.0280092	aperiodic
20	censat_20_22(rnd-6_family-13719,20)	31038365	31039370	1005	1.7194	0.103035	0.0315147	periodic
20	bsat_20_5(LSAU-BSAT_Composite,no_beta)	31039370	31043346	3976	1.80156	0.0953077	0.0356467	periodic
20	bsat_20_6	31066075	31069161	3086	0.036617	0.0721248	0.0272449	aperiodic
20	censat_20_23(SST1_Composite)	31177620	31179341	1721	0.715282	0.103035	0.0292183	periodic
20	censat_20_24(SST1)	31213889	31216132	2243	0.045029	0.0953077	0.0293974	periodic
20	mon_20_10	31216132	31225994	9862	2.67877	0.0927318	0.0368135	periodic
20	censat_20_25(SST1_Composite)	31318522	31322070	3548	1.3695	0.103035	0.0259083	aperiodic
20	mon_20_11	31322070	31366248	44178	2.71456	0.0824283	0.0296411	periodic
20	bsat_20_7(LSAU-BSAT_Composite,no_beta)	31389166	31391250	2084	8.01344	0.105611	0.0334816	periodic
20	censat_20_26(rnd-6_family-13719,20)	31391250	31392753	1503	0.940785	0.0824283	0.0269097	aperiodic
20	censat_20_27(rnd-6_family-13719,20)	31463338	31463984	646	2.53251	0.0875801	0.0304704	periodic
20	bsat_20_8(LSAU-BSAT_Composite,no_beta)	31463984	31464403	419	4.85919	0.103035	0.0398789	periodic
20	mon_20_12	31464403	31492598	28195	0.632453	0.0927318	0.0308823	periodic
20	censat_20_28(rnd-6_family-13719,20)	31501399	31503978	2579	7.51377	0.0798524	0.0288062	aperiodic
20	bsat_20_9(LSAU-BSAT_Composite,no_beta)	31503978	31506831	2853	3.16859	0.100459	0.0303999	periodic
20	mon_20_13	31625006	31685375	60369	1.74237	0.0927318	0.0297783	periodic
20	hsat3_20_2(A4)	31685375	31694601	9226	0.581942	0.0850042	0.0257563	aperiodic
20	mon_20_14	31694601	31725734	31133	2.83095	0.0901559	0.0272982	aperiodic
20	hor_20_5(S4C20H8)	31725734	31731518	5784	8.74084	0.0927318	0.0328676	periodic
20	hor_20_6(S4C20H7)	31731518	31747572	16054	0.478074	0.0824283	0.0345016	periodic
20	hor_20_7(S4C20H7/8)	31747572	31761402	13830	0.583803	0.0850042	0.0318928	periodic
20	hor_20_8(S4C20H8)	31761402	31774736	13334	1.0549	0.0850042	0.0316796	periodic
20	hor_20_9(S4C20H7/8)	31774736	31785329	10593	0.51619	0.0875801	0.0337206	periodic
20	hor_20_10(S4C20H7)	31785329	31844271	58942	0.588171	0.0850042	0.0336194	periodic
20	hor_20_11(S4C20H8)	31844271	31905998	61727	1.17903	0.0850042	0.0320435	periodic
20	mon_20_15	31905998	32017135	111137	3.24181	0.0927318	0.0303846	periodic
20	hsat3_20_3(B3,A1,A2)	32017135	32969590	952455	0.277372	0.0850042	0.0287647	aperiodic
20	censat_20_29(CER)	34784173	34784555	382	0.570681	0.110763	0.024703	aperiodic
20	censat_20_30(SST1)	37114911	37114981	70	0			aperiodic
21	tar_21_1	0	2999	2999	0.310103	0.329713	0.165786	aperiodic
21	censat_21_1(ACRO_composite)	65354	223691	158337	3.51979	0.0927318	0.051018	periodic
21	censat_21_2(rnd-1_family-0)	224198	226367	2169	0.0368834	0.105611	0.0480121	periodic
21	gsat_21_1(GSATII)	226367	231947	5580	0.0396057	0.103035	0.0304456	periodic
21	censat_21_3(SATR)	249841	253690	3849	0.106521	0.0901559	0.0250354	aperiodic
21	hsat5_21_1(HSat5)	293068	294301	1233	2.12733	0.0875801	0.0260832	aperiodic
21	hsat5_21_2(HSat5)	314493	316675	2182	0.578827	0.103035	0.0282716	aperiodic
21	hsat5_21_3(HSat5)	329690	330552	862	1.24246	0.110763	0.0276951	aperiodic
21	censat_21_4(CER)	330552	334605	4053	0.520849	0.04379	0.0269193	aperiodic
21	hsat3_21_1(A4)	446242	468879	22637	0.451782	0.0901559	0.0270548	aperiodic
21	bsat_21_1(LSAU-BSAT_Composite)	468879	1117360	648481	0.166848	0.0798524	0.0342685	aperiodic
21	hsat3_21_2(B4)	1117360	1241002	123642	0.307121	0.0901559	0.0295581	periodic
21	hsat1_21_1(HSat1A)	1241002	1953075	712073	0.0014198	0.118491	0.0829757	periodic
21	bsat_21_2(LSAU-BSAT_Composite)	1953075	1979970	26895	0.0394497	0.0824283	0.0338937	periodic
21	hsat3_21_3(A4,A2)	1979970	2132547	152577	0.227518	0.0875801	0.0265732	aperiodic
21	hsat5_21_4(HSat5)	2245842	2247072	1230	4.41301	0.105611	0.0303438	periodic
21	hsat5_21_5(HSat5)	2250668	2252036	1368	0.601608	0.0927318	0.0285805	aperiodic
21	censat_21_5(SATR)	2305364	2307506	2142	9.05415	0.0953077	0.0254865	aperiodic
21	censat_21_6(SATR)	2310429	2314274	3845	0.322497	0.0901559	0.0262125	aperiodic
21	gsat_21_2(GSATII)	2341094	2342787	1693	24.6639	0.100459	0.0323408	periodic
21	censat_21_7(ACRO_composite)	2342952	2372001	29049	0.93122	0.0927318	0.0514581	periodic
21	censat_21_8(CER)	2388338	2400429	12091	7.41246	0.0927318	0.0245178	aperiodic
21	censat_21_9(CER)	2472263	2534060	61797	1.03222	0.0901559	0.025196	aperiodic
21	bsat_21_3	2556159	2559178	3019	0.10467	0.0798524	0.0258741	aperiodic
21	bsat_21_4(LSAU-BSAT_Composite,no_beta)	2573180	2575055	1875	3.10133	0.105611	0.031113	periodic
21	censat_21_10(CER)	2692050	2762174	70124	3.14327	0.0927318	0.0246465	aperiodic
21	gsat_21_3(GSATII)	2785899	2788305	2406	0.135495	0.100459	0.0272172	aperiodic
21	bsat_21_5	2793445	2805667	12222	3.21887	0.0824283	0.0279644	aperiodic
21	bsat_21_6	2976159	2988590	12431	2.90717	0.0953077	0.0284145	aperiodic
21	rDNA_21_1	3108298	5612715	2504417	11277.3	0.0978836	0.0265501	aperiodic
21	censat_21_11(ACRO_composite)	5613027	5618121	5094	1.7077	0.0927318	0.0425425	periodic
21	censat_21_12(rnd-1_family-0)	5652611	5661880	9269	0.0852303	0.105611	0.0568817	periodic
21	gsat_21_4(GSATII)	5661880	5667308	5428	0.098563	0.103035	0.0315281	periodic
21	censat_21_13(SATR1)	5671424	5673372	1948	12.9035	0.0824283	0.0271934	aperiodic
21	hsat5_21_6(HSat5)	5719396	5720632	1236	1.30178	0.105611	0.0285031	aperiodic
21	censat_21_14(CER)	5720636	5724774	4138	0.544224	0.04379	0.0291002	aperiodic
21	hsat3_21_4(A4)	5832026	6023807	191781	0.286499	0.0875801	0.0270641	aperiodic
21	bsat_21_7(LSAU-BSAT_Composite)	6023807	6334841	311034	0.112464	0.0978836	0.033535	periodic
21	hsat3_21_5(B2,A1)	6383977	6494491	110514	1.01299	0.0850042	0.0260019	aperiodic
21	censat_21_15(ACRO_composite)	6533459	6547528	14069	2.25332	0.0927318	0.0512222	periodic
21	gsat_21_5(GSATII)	6547528	6549713	2185	0.00915332	0.100459	0.0304377	periodic
21	censat_21_16(SATR1)	6574818	6578668	3850	0.124935	0.0901559	0.0276712	aperiodic
21	hsat5_21_7(HSat5)	6588886	6590244	1358	1.89838	0.0953077	0.0269536	aperiodic
21	hsat5_21_8(HSat5)	6607521	6609671	2150	0.665581	0.0798524	0.0278007	aperiodic
21	hsat5_21_9(HSat5)	6622145	6623401	1256	1.32882	0.105611	0.0301839	periodic
21	censat_21_17(CER)	6623402	6624776	1374	0.356623	0.0901559	0.0246319	aperiodic
21	hsat3_21_6(B3)	6665005	6853060	188055	0.264412	0.0850042	0.0313302	periodic
21	hsat1_21_2(HSat1B,A)	6853060	6892025	38965	0.33951	0.118491	0.0297521	periodic
21	censat_21_18(TCTAn)	6900950	6903594	2644	0	0.257588	0.0454479	aperiodic
21	hsat3_21_7(A2)	7042262	7047487	5225	0.198086	0.0721248	0.0251049	aperiodic
21	bsat_21_8	7047487	7052233	4746	0.0379267	0.0850042	0.0328054	periodic
21	hsat3_21_8(B3,A1)	7101753	7390654	288901	0.488596	0.0798524	0.030676	aperiodic
21	censat_21_19(CER)	7497101	7501723	4622	12.5312	0.04379	0.0287005	aperiodic
21	hsat5_21_10(HSat5)	7501723	7502977	1254	4.20893	0.105611	0.030827	periodic
21	hsat5_21_11(HSat5)	7515462	7517598	2136	0.429307	0.0772765	0.0292068	aperiodic
21	hsat5_21_12(HSat5)	7534723	7536072	1349	0.479615	0.100459	0.0283646	aperiodic
21	censat_21_20(SATR)	7589024	7591147	2123	11.3613	0.0927318	0.0243348	aperiodic
21	censat_21_21(SATR)	7594065	7597823	3758	0.335817	0.0875801	0.0260321	aperiodic
21	gsat_21_6(GSATII)	7622978	7626410	3432	18.1107	0.100459	0.03169	periodic
21	censat_21_22(ACRO_composite)	7626410	7632453	6043	3.37283	0.0927318	0.0524957	periodic
21	hsat5_21_13(HSat5)	7638878	7640117	1239	1.17111	0.103035	0.0287632	aperiodic
21	censat_21_23(CER)	7640117	7644359	4242	0.388732	0.04379	0.0275177	aperiodic
21	hsat3_21_9(B3)	7684062	7729200	45138	0.346227	0.0824283	0.0297567	periodic
21	hsat1_21_3(HSat1B,A)	7729200	7794709	65509	0.27587	0.118491	0.0561319	periodic
21	hsat3_21_10(A1)	7986294	7995729	9435	2.95464	0.103035	0.0236416	aperiodic
21	censat_21_24(rnd-6_family-4384)	8012803	8014655	1852	1.0027	0.0540936	0.0490643	aperiodic
21	censat_21_25(rnd-6_family-4384)	8046431	8048414	1983	0.597075	0.0927318	0.0392152	periodic
21	censat_21_26(rnd-6_family-4384)	8073769	8074497	728	1.63462	0.0540936	0.0483165	aperiodic
21	hsat3_21_11(A2,A4)	8095838	8168711	72873	0.0640704	0.0953077	0.0256273	aperiodic
21	mon_21_1	8168711	8180694	11983	0.826254	0.0901559	0.0283007	aperiodic
21	hor_21_1(S4/6C13/14/21H1)	8180694	8253498	72804	0.813692	0.0901559	0.0290392	periodic
21	mon_21_2	8253498	8396079	142581	2.50404	0.0927318	0.0308153	periodic
21	hsat3_21_12(A4)	8396079	8432134	36055	1.29169	0.0772765	0.0261698	aperiodic
21	mon_21_3	8432134	8479566	47432	6.05789	0.0927318	0.028954	aperiodic
21	hsat3_21_13(A4)	8479566	8491868	12302	0.557389	0.0798524	0.0270029	aperiodic
21	mon_21_4	8491868	8551812	59944	2.95873	0.0927318	0.0283591	aperiodic
21	bsat_21_9(LSAU-BSAT_Composite,no_beta)	8677265	8679423	2158	7.54634	0.108187	0.0318034	periodic
21	censat_21_27(rnd-6_family-13719,20)	8679423	8682709	3286	3.85971	0.0824283	0.0285229	aperiodic
21	censat_21_28(rnd-6_family-13719,20)	8761635	8763124	1489	0.879113	0.0798524	0.0262478	aperiodic
21	bsat_21_10(LSAU-BSAT_Composite,no_beta)	8763124	8770801	7677	0.584082	0.0927318	0.0323611	periodic
21	mon_21_5	8799240	8882331	83091	3.42763	0.0927318	0.0290005	periodic
21	hor_21_2(S5C13/14/21H2)	8882331	8898215	15884	1.69447	0.105611	0.0311918	periodic
21	mon_21_6	8898215	8904725	6510	1.57896	0.0798524	0.0298919	aperiodic
21	hsat3_21_14(A4,A1)	8904725	9022780	118055	0.0673415	0.0875801	0.0267506	aperiodic
21	censat_21_29(rnd-1_family-0)	9143157	9145062	1905	0.07979	0.105611	0.0554123	periodic
21	censat_21_30(SST1_Composite)	9158761	9159761	1000	4.507	0.0978836	0.0286186	aperiodic
21	censat_21_31(SST1_Composite)	9375566	9453313	77747	3.85175	0.0953077	0.0327688	periodic
21	censat_21_32(SST1)	9731827	9733749	1922	78.0203	0.0978836	0.0296763	periodic
21	gsat_21_7(GSATII/TAR1)	9733749	9739404	5655	78.8431	0.100459	0.0298557	periodic
21	censat_21_33(rnd-1_family-0)	9739404	9748432	9028	12.9597	0.105611	0.0571478	periodic
21	censat_21_34(rnd-6_family-13719,20)	9850293	9852846	2553	10.3764	0.0772765	0.0277273	aperiodic
21	bsat_21_11(LSAU-BSAT_Composite,no_beta)	9852846	9855710	2864	2.96962	0.100459	0.0319759	periodic
21	mon_21_7	9981828	10047043	65215	2.56614	0.0901559	0.0302888	periodic
21	hsat3_21_15(A4)	10047043	10053307	6264	3.80556	0.0850042	0.0264585	aperiodic
21	mon_21_8	10053307	10124674	71367	1.95659	0.0927318	0.029922	periodic
21	hsat3_21_16(A4)	10124674	10132406	7732	0.449043	0.0824283	0.0271907	aperiodic
21	mon_21_9	10132406	10184249	51843	3.956	0.0927318	0.0308575	periodic
21	hsat3_21_17(A4)	10184249	10307662	123413	0.840989	0.0901559	0.0262165	aperiodic
21	mon_21_10	10307662	10387680	80018	4.10549	0.0927318	0.0290965	periodic
21	hsat3_21_18(A1,A4)	10387680	10475882	88202	1.51723	0.0901559	0.0262874	aperiodic
21	censat_21_35(rnd-6_family-4384)	10499051	10499556	505	3.48911	0.0927318	0.0352377	periodic
21	censat_21_36(rnd-6_family-4384)	10509850	10510072	222	0.603604	0.066973	0.0567934	aperiodic
21	hsat1_21_4(HSat1B,A)	10801147	10962853	161706	0.069311	0.118491	0.0631801	periodic
21	hor_21_3(S2C13/21H1L)	10962853	11294002	331149	0.124548	0.115915	0.0320707	periodic
21	hor_21_4(S2C13/21H1-B)	11294002	11297883	3881	1.04586	0.115915	0.0325164	periodic
21	hor_21_5(S2C13/21H1L)	11297883	11303831	5948	0.125252	0.115915	0.0329401	periodic
21	hor_21_6(S2C13/21H1L,B)	11303831	11306378	2547	2.03691	0.115915	0.0329883	periodic
21	dhor_21_1(SF2)	11306378	11307743	1365	1.10037	0.0927318	0.032015	periodic
21	dhor_21_2(S02CMH2d)	11307743	11311467	3724	3.22449	0.0875801	0.0342985	periodic
21	mon_21_11	11311467	11341385	29918	3.86069	0.0927318	0.0297234	periodic
21	censat_21_37(CER)	11466496	11476107	9611	1.85891	0.118491	0.0305106	periodic
21	hsat5_21_14(HSat5)	12190395	12195875	5480	0.0793796	0.0901559	0.0300621	periodic
21	hsat5_21_15(HSat5)	12252109	12253410	1301	0.0561107	0.0927318	0.0295191	periodic
21	censat_21_38(rnd-6_family-13719,20)	12413680	12415499	1819	1.37273	0.105611	0.0313382	periodic
21	gsat_21_8(GSATX)	12415499	12418454	2955	1.01455	0.0978836	0.0437718	periodic
22	tar_22_1	0	4578	4578	0.151376	0.329713	0.158836	aperiodic
22	censat_22_1(ACRO_composite)	67032	226744	159712	7.50703	0.0927318	0.047689	periodic
22	gsat_22_1(GSATII)	226952	230153	3201	0.0802874	0.100459	0.0280399	aperiodic
22	censat_22_2(SATR)	248029	251879	3850	0.13013	0.0901559	0.0251342	aperiodic
22	censat_22_3(NovelTandem)	277758	349847	72089	0.186159	0.0798524	0.0388751	aperiodic
22	hsat3_22_1(A4)	459516	482112	22596	0.39892	0.0901559	0.0270842	aperiodic
22	bsat_22_1(LSAU-BSAT_Composite)	482112	2388000	1905888	0.185147	0.0798524	0.0364701	aperiodic
22	hsat3_22_2(B4)	2388000	2615080	227080	0.252814	0.0927318	0.0293682	periodic
22	hsat1_22_1(HSat1A)	2615080	3502665	887585	0.00183757	0.118491	0.0857488	periodic
22	bsat_22_2(LSAU-BSAT_Composite)	3502665	3529630	26965	0.0372335	0.0824283	0.0338805	periodic
22	hsat3_22_3(A4,A2)	3529630	3634820	105190	0.297509	0.0850042	0.0263103	aperiodic
22	censat_22_4(CER)	3746133	3747558	1425	9.50737	0.0901559	0.0251263	aperiodic
22	hsat5_22_1(HSat5)	3747558	3748807	1249	3.95276	0.105611	0.0283225	aperiodic
22	hsat5_22_2(HSat5)	3752403	3753771	1368	0.601608	0.0901559	0.0292666	periodic
22	censat_22_5(SATR)	3807093	3809227	2134	9.88519	0.0953077	0.0271626	aperiodic
22	censat_22_6(SATR)	3812149	3815993	3844	0.334027	0.0875801	0.0248237	aperiodic
22	gsat_22_2(GSATII)	3841139	3844392	3253	20.5579	0.103035	0.0319523	periodic
22	censat_22_7(ACRO_composite)	3844392	4128732	284340	0.920774	0.0927318	0.0496902	periodic
22	censat_22_8(CER)	4145075	4157833	12758	7.58779	0.0927318	0.024334	aperiodic
22	censat_22_9(CER)	4229666	4291278	61612	1.09576	0.0901559	0.0250884	aperiodic
22	bsat_22_3(LSAU-BSAT_Composite,no_beta)	4312412	4314288	1876	2.55917	0.0798524	0.029337	aperiodic
22	censat_22_10(CER)	4409321	4448073	38752	2.77934	0.0927318	0.0244986	aperiodic
22	gsat_22_3(GSATII)	4471767	4474420	2653	0.177535	0.103035	0.0276167	aperiodic
22	bsat_22_4	4479560	4491801	12241	3.26403	0.0850042	0.0276801	aperiodic
22	bsat_22_5	4661600	4674054	12454	2.83082	0.0978836	0.0279739	aperiodic
22	rDNA_22_1	4793794	5720650	926856	11587.4	0.0978836	0.026517	aperiodic
22	censat_22_11(ACRO_composite)	5720694	5728749	8055	1.69448	0.0927318	0.0421598	periodic
22	censat_22_12(rnd-1_family-0)	5760141	5769058	8917	0.0869126	0.105611	0.0537059	periodic
22	gsat_22_4(GSATII)	5769058	5775656	6598	0.0785086	0.103035	0.0311888	periodic
22	censat_22_13(SATR)	5779774	5781722	1948	12.768	0.0824283	0.0256509	aperiodic
22	hsat5_22_3(HSat5)	5827712	5828834	1122	1.51783	0.108187	0.0289165	aperiodic
22	censat_22_14(CER)	5828834	5833506	4672	0.460616	0.04379	0.0277815	aperiodic
22	hsat3_22_4(A4)	5940462	6011423	70961	0.417821	0.0772765	0.0268711	aperiodic
22	bsat_22_6(LSAU-BSAT_Composite)	6011423	6237353	225930	0.693277	0.0978836	0.0335798	periodic
22	censat_22_15(CCTGGCn)	6340074	6343722	3648	19.2248	0.0927318	0.0271881	aperiodic
22	censat_22_16(rnd-6_family-4384)	6393557	6394094	537	6.99255	0.0515177	0.0397212	aperiodic
22	hsat3_22_5(B)	6397270	6399581	2311	0.135439	0.115915	0.0486301	periodic
22	censat_22_17(rnd-6_family-4384)	6416706	6419427	2721	13.115	0.0927318	0.0380929	periodic
22	censat_22_18(rnd-6_family-4384)	6452910	6454596	1686	1.77995	0.0953077	0.04929	periodic
22	hsat3_22_6(A1)	6470662	6478601	7939	0.169543	0.103035	0.0263841	aperiodic
22	bsat_22_7	6530478	6538927	8449	0.0492366	0.0798524	0.0336066	aperiodic
22	hsat3_22_7(A4)	6538927	6550173	11246	1.14218	0.0747006	0.0262994	aperiodic
22	hsat1_22_2(HSat1B,A)	6724442	7100921	376479	0.204391	0.0824283	0.0288806	aperiodic
22	hsat3_22_8(B3)	7100921	7448015	347094	0.0921681	0.0850042	0.0304754	periodic
22	censat_22_19(CER)	7479189	7483990	4801	9.9448	0.04379	0.027837	aperiodic
22	hsat5_22_4(HSat5)	7483990	7485243	1253	4.25778	0.105611	0.0283931	aperiodic
22	hsat5_22_5(HSat5)	7496873	7499006	2133	0.455227	0.0798524	0.0277908	aperiodic
22	hsat5_22_6(HSat5)	7516137	7517510	1373	0.19665	0.103035	0.0286336	aperiodic
22	censat_22_20(SATR)	7527688	7531541	3853	0.328316	0.0875801	0.0263406	aperiodic
22	gsat_22_5(GSATII)	7556525	7559561	3036	17.8567	0.100459	0.0294386	periodic
22	censat_22_21(ACRO_composite)	7559726	7584358	24632	1.17031	0.0927318	0.0474845	periodic
22	hsat5_22_7(HSat5)	7614005	7615391	1386	1.69336	0.100459	0.0295128	periodic
22	hsat5_22_8(HSat5)	7632457	7634607	2150	0.548372	0.0798524	0.0276613	aperiodic
22	hsat5_22_9(HSat5)	7647094	7648347	1253	1.12929	0.105611	0.0283737	aperiodic
22	censat_22_22(CER)	7648347	7653117	4770	0.685325	0.04379	0.0287076	aperiodic
22	hsat3_22_9(A4,B3)	7759145	7869235	110090	0.178145	0.0875801	0.0272724	aperiodic
22	bsat_22_8(LSAU-BSAT_Composite)	7869235	7973003	103768	0.308958	0.0978836	0.0334177	periodic
22	hsat3_22_10(A4,A2)	7973003	8276611	303608	0.127846	0.0901559	0.0273766	aperiodic
22	hsat3_22_11(A4)	8321654	8461789	140135	0.196667	0.0875801	0.0277663	aperiodic
22	hor_22_1(S6C22H2-A)	8489239	8577557	88318	0.217974	0.0901559	0.0315254	periodic
22	hor_22_2(S6C22H2-B)	8577557	8701782	124225	0.0783498	0.0875801	0.0281907	aperiodic
22	hor_22_3(S6C22H2-A)	8701782	8724213	22431	0.153181	0.0901559	0.0313298	periodic
22	hor_22_4(S6C22H2-B)	8724213	8756596	32383	0.0843035	0.0875801	0.0282548	aperiodic
22	hor_22_5(S6C22H2-A)	8756596	8811730	55134	0.246599	0.0901559	0.0321302	periodic
22	mon_22_1	8811730	8826762	15032	8.58495	0.0927318	0.0297644	periodic
22	hsat3_22_12(A4)	8826762	8919871	93109	0.204706	0.0927318	0.0271846	aperiodic
22	mon_22_2	8919871	8919927	56	0	0.103035	0.0458699	periodic
22	censat_22_23(CER)	8941568	8941826	258	1.02326	0.0824283	0.0278679	aperiodic
22	mon_22_3	8954330	8962754	8424	0.15349	0.0927318	0.0307549	periodic
22	hsat3_22_13(A4,A1)	8962754	9048630	85876	0.710222	0.0927318	0.0272712	aperiodic
22	censat_22_24(CER)	9151293	9166656	15363	4.32422	0.04379	0.0260132	aperiodic
22	bsat_22_9(LSAU-BSAT_Composite,no_beta)	9247579	9249556	1977	26.9029	0.110763	0.0368065	periodic
22	censat_22_25(rnd-6_family-13719)	9249556	9251457	1901	35.3546	0.0850042	0.0274385	aperiodic
22	censat_22_26(rnd-6_family-13720)	9315474	9316557	1083	2.77562	0.0824283	0.0291543	periodic
22	bsat_22_10(LSAU-BSAT_Composite,no_beta)	9316557	9320537	3980	1.34095	0.0953077	0.0322544	periodic
22	bsat_22_11	9343602	9346649	3047	0.0744995	0.103035	0.027449	aperiodic
22	bsat_22_12(LSAU-BSAT_Composite)	9364841	9685670	320829	0.0560111	0.0978836	0.0333316	periodic
22	hsat3_22_14(B3)	9685670	9720911	35241	0.191425	0.0850042	0.027883	aperiodic
22	censat_22_27(ACRO_composite)	9795619	9803869	8250	1.99127	0.0927318	0.058017	periodic
22	gsat_22_6(GSATII)	9804032	9807311	3279	0.0783776	0.100459	0.0311519	periodic
22	censat_22_28(SATR)	9832423	9836274	3851	0.130615	0.0901559	0.0267068	aperiodic
22	censat_22_29(SATR)	9839196	9841333	2137	8.96724	0.0927318	0.0251929	aperiodic
22	hor_22_6(S6C22H2-B)	9946504	10138089	191585	0.125704	0.0901559	0.0298861	periodic
22	hor_22_7(S6C22H2-A)	10138089	10184152	46063	0.279682	0.0901559	0.0306261	periodic
22	mon_22_4	10184152	10190912	6760	1.53284	0.0927318	0.0288989	aperiodic
22	hsat3_22_15(A4)	10190912	10293512	102600	0.242495	0.0927318	0.0272676	aperiodic
22	mon_22_5	10293512	10293568	56	0			aperiodic
22	mon_22_6	10341988	10357967	15979	6.236	0.0927318	0.0307325	periodic
22	hsat3_22_16(A1,A4)	10357967	10424956	66989	0.866097	0.0901559	0.0271882	aperiodic
22	censat_22_30(CER)	10529794	10534416	4622	12.7951	0.04379	0.0289776	aperiodic
22	hsat5_22_10(HSat5)	10534416	10535670	1254	4.31738	0.105611	0.0301781	periodic
22	hsat5_22_11(HSat5)	10548153	10550289	2136	0.429307	0.0798524	0.0285651	aperiodic
22	hsat5_22_12(HSat5)	10567415	10568764	1349	0.479615	0.100459	0.0286513	aperiodic
22	censat_22_31(SATR)	10621704	10623827	2123	10.8333	0.0927318	0.0251732	aperiodic
22	censat_22_32(SATR)	10626751	10630585	3834	0.334637	0.0875801	0.0258513	aperiodic
22	gsat_22_7(GSATII)	10655768	10659119	3351	19.4891	0.100459	0.0298491	periodic
22	censat_22_33(ACRO_composite)	10659119	10665166	6047	3.02084	0.0927318	0.0523997	periodic
22	hsat5_22_13(HSat5)	10671593	10672846	1253	1.15802	0.103035	0.0280954	aperiodic
22	censat_22_34(CER)	10672846	10677088	4242	0.408062	0.04379	0.0274808	aperiodic
22	hsat3_22_17(B3)	10716788	10963906	247118	0.305449	0.0824283	0.0301072	periodic
22	hsat1_22_3(HSat1A,B)	10963906	11013020	49114	0.395956	0.118491	0.0530662	periodic
22	hsat3_22_18(A1)	11202246	11211789	9543	2.96364	0.108187	0.023895	aperiodic
22	censat_22_35(rnd-6_family-4384)	11228084	11230031	1947	1.26759	0.0515177	0.0467462	aperiodic
22	censat_22_36(rnd-6_family-4384)	11261965	11263948	1983	0.6823	0.0927318	0.0385409	periodic
22	hsat2_22_1(B)	11281177	11283169	1992	0.10994	0.303954	0.0588039	aperiodic
22	censat_22_37(rnd-6_family-4384)	11287923	11288246	323	9.2291	0.0901559	0.0435637	periodic
22	censat_22_38(TCATTn)	11340578	11343892	3314	0.235969	0.0901559	0.0387072	periodic
22	censat_22_39(rnd-6_family-4384)	11410993	11412551	1558	4.26187	0.0515177	0.0507703	aperiodic
22	censat_22_40(rnd-6_family-4384)	11456252	11458176	1924	0.397089	0.0515177	0.044029	aperiodic
22	censat_22_41(rnd-1_family-0)	11507140	11510283	3143	0.493796	0.105611	0.0633308	periodic
22	censat_22_42(rnd-6_family-4384)	11526349	11529452	3103	0.696423	0.0540936	0.0357802	aperiodic
22	censat_22_43(rnd-6_family-4384)	11556215	11557025	810	0.591358	0.0540936	0.0481699	aperiodic
22	hsat3_22_19(A4,A2)	11578307	11687118	108811	0.111772	0.0927318	0.0260736	aperiodic
22	mon_22_7	11687118	11860515	173397	2.33653	0.0927318	0.0303699	periodic
22	hsat3_22_20(A4)	11860515	11962777	102262	0.425505	0.0901559	0.0263771	aperiodic
22	mon_22_8	11962777	12026699	63922	4.91767	0.0927318	0.0285209	aperiodic
22	hsat3_22_21(A4)	12026699	12039407	12708	0.195546	0.0824283	0.0265611	aperiodic
22	mon_22_9	12039407	12161875	122468	2.61868	0.0927318	0.030088	periodic
22	bsat_22_13(LSAU-BSAT_Composite,no_beta)	12283837	12286028	2191	10.9073	0.0798524	0.0293714	aperiodic
22	censat_22_44(rnd-6_family-13719,20)	12286028	12289227	3199	4.35917	0.103035	0.0286345	aperiodic
22	mon_22_10	12298066	12309119	11053	1.19081	0.0927318	0.0297173	periodic
22	hor_22_8(S4C22H3)	12309119	12320062	10943	1.44229	0.0927318	0.0318536	periodic
22	mon_22_11	12320062	12327143	7081	2.52775	0.0927318	0.0344349	periodic
22	censat_22_45(CER)	12358860	12359116	256	4.48828	0.0978836	0.030617	periodic
22	bsat_22_14	12378795	12378963	168	0	0.0824283	0.0440318	periodic
22	censat_22_46(rnd-6_family-13719,20)	12403155	12404653	1498	0.384513	0.0875801	0.0293222	periodic
22	bsat_22_15(LSAU-BSAT_Composite,no_beta)	12404653	12407579	2926	0.235475	0.105611	0.0302551	periodic
22	bsat_22_16(LSAU-BSAT_Composite,no_beta)	12410151	12412325	2174	1.15823	0.0875801	0.0303179	periodic
22	mon_22_12	12420151	12449808	29657	4.03234	0.0927318	0.0300623	periodic
22	hsat3_22_22(A4)	12449808	12480444	30636	1.00588	0.0747006	0.0252759	aperiodic
22	mon_22_13	12480444	12554764	74320	4.19652	0.0901559	0.0297578	periodic
22	bsat_22_17(LSAU-BSAT_Composite,no_beta)	12583263	12590899	7636	3.05513	0.0978836	0.0320527	periodic
22	censat_22_47(rnd-6_family-13719,20)	12590899	12592442	1543	0.399222	0.0927318	0.0305054	periodic
22	bsat_22_18	12617571	12617748	177	0	0.0901559	0.0481644	periodic
22	censat_22_48(rnd-6_family-13719,20)	12666501	12669859	3358	8.84485	0.0824283	0.0286657	aperiodic
22	bsat_22_19(LSAU-BSAT_Composite,no_beta)	12669859	12672038	2179	2.44011	0.0953077	0.0328201	periodic
22	dhor_22_1(SF02)	12765164	12769754	4590	3.48192	0.0824283	0.0322887	periodic
22	dhor_22_2(S2CMH4d)	12769754	12779856	10102	12.9596	0.0901559	0.0314347	periodic
22	dhor_22_3(SF2)	12779856	12788180	8324	2.07857	0.0824283	0.0338577	periodic
22	hor_22_9(S2C14/22H1L)	12788180	15711065	2922885	0.161221	0.0824283	0.0333941	periodic
22	dhor_22_4(S2CMH4d)	15711065	15726633	15568	8.25103	0.0901559	0.0299556	periodic
22	dhor_22_5(S02CMH2d)	15726633	15730037	3404	2.90012	0.0927318	0.0338128	periodic
22	dhor_22_6(SF02)	15730037	15742829	12792	2.47428	0.0824283	0.0323413	periodic
22	mon_22_14	15742829	15786187	43358	5.56008	0.0875801	0.0285022	aperiodic
22	censat_22_49(CER)	15926552	16045085	118533	1.04451	0.118491	0.0287077	aperiodic
22	censat_22_50(rnd-1_family-0)	16086102	16092306	6204	11.3522	0.105611	0.0561019	periodic
22	mon_22_15	16338507	16339514	1007	1.25521	0.0850042	0.0246635	aperiodic
22	gsat_22_8(GSATII)	16453393	16456165	2772	34.899	0.103035	0.0311458	periodic
22	censat_22_51(rnd-1_family-0)	16456165	16465838	9673	11.8862	0.105611	0.0564939	periodic
22	dhor_22_7(SF2)	16514391	16540773	26382	1.47684	0.115915	0.0348406	periodic
22	dhor_22_8(S02CMH2d)	16540773	16558276	17503	1.00863	0.0901559	0.0329323	periodic
22	dhor_22_9(S2CMH4d)	16558276	16570374	12098	9.89453	0.0875801	0.0324956	periodic
22	mon_22_16	16570374	16661575	91201	5.23068	0.0901559	0.0282024	aperiodic
22	censat_22_52(CER)	16661575	16661678	103	25.767	0.0463659	0.033485	aperiodic
22	censat_22_53(CER)	16798016	16811126	13110	1.78688	0.118491	0.0305917	periodic
22	hsat2_22_2(B)	16834972	16844530	9558	0.00774221	0.303954	0.0589688	aperiodic
22	mon_22_17	16844530	16875107	30577	4.31256	0.0901559	0.0293535	periodic
22	hsat2_22_3(B)	16875107	16932518	57411	0.00954521	0.118491	0.0564254	periodic
22	censat_22_54(rnd-6_family-4384)	16949610	16952329	2719	1.20633	0.0953077	0.037247	periodic
22	hsat2_22_4(B)	16979900	17018755	38855	0.00460687	0.118491	0.0577523	periodic
22	hsat3_22_23(A1)	17018755	17038232	19477	3.82148	0.0901559	0.0262736	aperiodic
22	hsat2_22_5(B)	17038232	17057613	19381	0.0365306	0.303954	0.0588529	aperiodic
22	censat_22_55(rnd-6_family-4384)	17062358	17063283	925	5.02162	0.0515177	0.0503084	aperiodic
22	censat_22_56(SST1)	17424208	17425501	1293	0.187935	0.108187	0.0292742	periodic
22	hsat1_22_4(HSat1B)	18873529	18879842	6313	1.14652	0.115915	0.0336841	periodic
22	hsat1_22_5(HSat1B)	19066844	19074963	8119	1.8288	0.115915	0.0326359	periodic
22	hsat1_22_6(HSat1B)	19100335	19107854	7519	1.37758	0.115915	0.0368784	periodic
22	censat_22_57(rnd-1_family-0)	20032203	20037050	4847	0.0433258	0.105611	0.054752	periodic
2	censat_2_1(AGCCAAGCCn)	87403406	87443522	40116	5.35691	0.108187	0.0346197	periodic
2	hsat3_2_1(B3)	89350757	89357797	7040	0.0582386	0.0850042	0.0260154	aperiodic
2	hsat3_2_2(B3,A1,A2)	89357797	89381798	24001	0.51477	0.0875801	0.0265881	aperiodic
2	hsat2_2_1(B)	89381798	89383323	1525	0	0.118491	0.0542502	periodic
2	hsat2_2_2(B)	89384883	89417214	32331	0.0053509	0.303954	0.0541029	aperiodic
2	censat_2_2(rnd-6_family-4384)	89421410	89422078	668	3.97006	0.0515177	0.0416248	aperiodic
2	censat_2_3(TGGCCCn)	89685523	89695350	9827	35.4972	0.0927318	0.0300428	periodic
2	censat_2_4(CCAAGCCAGn)	89725009	89763207	38198	3.08116	0.23183	0.0387067	aperiodic
2	censat_2_5(rnd-6_family-4384)	89782161	89785482	3321	2.9199	0.0515177	0.0424148	aperiodic
2	censat_2_6(rnd-6_family-4384)	89819164	89821733	2569	0.754768	0.0927318	0.0370504	periodic
2	hsat2_2_3(B)	89838797	89862611	23814	0.015831	0.118491	0.055915	periodic
2	censat_2_7(rnd-6_family-4384)	89879677	89882246	2569	1.20436	0.0927318	0.0392993	periodic
2	censat_2_8(rnd-6_family-4384)	89915927	89919206	3279	2.81244	0.0515177	0.0434789	aperiodic
2	censat_2_9(TGGCTTGGCn)	89937668	90016776	79108	1.02155	0.23183	0.0381641	aperiodic
2	censat_2_10(rnd-6_family-4384)	90319374	90320019	645	2.36899	0.0540936	0.0419766	aperiodic
2	hsat2_2_4(B)	90324213	90364427	40214	0.544388	0.118491	0.051124	periodic
2	hsat3_2_3(A1,A2,B3)	90364427	90389494	25067	0.0337496	0.0901559	0.0269157	aperiodic
2	hsat3_2_4(B3)	90389494	90396446	6952	0.172756	0.0875801	0.026251	aperiodic
2	censat_2_11(AluSx_CCAAGCCAGn)	90843357	90909680	66323	9.6665	0.234405	0.0331801	aperiodic
2	censat_2_12(rnd-6_family-4384)	90933822	90937262	3440	3.64593	0.0515177	0.0411655	aperiodic
2	censat_2_13(rnd-6_family-4384)	90970871	90972985	2114	0.816935	0.0927318	0.039064	periodic
2	hsat2_2_5(B)	90991502	91610549	619047	0.00747601	0.118491	0.0603489	periodic
2	censat_2_14(rnd-6_family-4384)	91627604	91630167	2563	1.19664	0.0927318	0.0347303	periodic
2	censat_2_15(rnd-6_family-4384)	91663683	91666107	2424	3.45668	0.0515177	0.0452255	aperiodic
2	censat_2_16(AluSx_GCTGGCTTGn)	91690660	91709494	18834	9.56504	0.110763	0.0326298	periodic
2	censat_2_17(rnd-6_family-4384)	91998568	92000142	1574	2.81131	0.0515177	0.0431077	aperiodic
2	censat_2_18(rnd-6_family-4384)	92202030	92202605	575	1.52	0.0515177	0.0456489	aperiodic
2	censat_2_19(rnd-6_family-4384)	92232005	92233600	1595	6.17555	0.0515177	0.0427111	aperiodic
2	censat_2_20(rnd-6_family-4384)	92260924	92263505	2581	0.508718	0.0901559	0.0378626	periodic
2	hsat2_2_6(B)	92267959	92297386	29427	0.0165494	0.118491	0.0611223	periodic
2	dhor_2_1(S2CMH4d)	92297386	92300802	3416	1.6329	0.0953077	0.0312642	periodic
2	hor_2_1(S2C2H2-A,B)	92300802	92307119	6317	0.223049	0.0927318	0.032643	periodic
2	hor_2_2(S2C2H2-B)	92307119	92316502	9383	0.295534	0.0927318	0.032124	periodic
2	hor_2_3(S2C2H2-B,S2C2H1L,S2C18H1L,S2C20H1L,S2C20H5d)	92316502	92333543	17041	0.215891	0.0927318	0.0311664	periodic
2	hor_2_4(S2C2H1L)	92333543	94673023	2339480	0.0917272	0.113339	0.0344789	periodic
2	hor_2_5(S2C2H2-A)	94673023	94695067	22044	0.166939	0.0927318	0.0326451	periodic
2	censat_2_21(rnd-6_family-4384)	94778753	94779490	737	10.8467	0.0515177	0.0436531	aperiodic
2	censat_2_22(rnd-6_family-4384)	94812952	94815263	2311	1.43877	0.0927318	0.0346545	periodic
2	hsat2_2_7(B)	94832368	94863780	31412	0.0051891	0.303954	0.0594359	aperiodic
2	censat_2_23(rnd-6_family-4384)	94880912	94883222	2310	1.63247	0.0927318	0.034338	periodic
2	censat_2_24(rnd-6_family-4384)	94916691	94917678	987	3.57751	0.0515177	0.0405655	aperiodic
2	dhor_2_2(S2CMH4d)	95001216	95013880	12664	8.12429	0.0875801	0.0341256	periodic
2	dhor_2_3(S02CMH2d)	95013880	95020363	6483	6.98951	0.0901559	0.0319728	periodic
2	dhor_2_4(SF02)	95020363	95034734	14371	2.61123	0.0850042	0.0328437	periodic
2	mon_2_1	95034734	95077539	42805	3.70606	0.0953077	0.0273274	aperiodic
2	hsat5_2_1(HSat5)	95265161	95270866	5705	0.186854	0.100459	0.0289759	aperiodic
2	hsat5_2_2(HSat5)	95294883	95296231	1348	0.0608309	0.105611	0.0298807	periodic
2	censat_2_25(SATR)	95403721	95405500	1779	11.615	0.0927318	0.0227539	aperiodic
2	censat_2_26(SATR)	95408477	95412316	3839	0.160979	0.0927318	0.0256552	aperiodic
2	censat_2_27(SATR)	96049774	96052330	2556	1.89476	0.103035	0.0230241	aperiodic
2	censat_2_28(MER5A1)	96402192	96449090	46898	26.9035	0.0953077	0.0397671	periodic
2	censat_2_29(L1PA12)	96495379	96498974	3595	55.0609	0.0540936	0.0312338	aperiodic
2	censat_2_30(MER5A1)	97694089	97724161	30072	29.9423	0.0953077	0.0407725	periodic
2	censat_2_31(L1PA12)	97772254	97776878	4624	59.8527	0.0540936	0.0290721	aperiodic
2	censat_2_32(L1PA12)	97945141	97949797	4656	16.8494	0.0540936	0.0282733	aperiodic
2	mon_2_2	98345037	98345164	127	0	0.13137	0.0285627	aperiodic
3	mon_3_1	90339372	90571008	231636	4.80469	0.0901559	0.0292671	periodic
3	dhor_3_1(S01CMH1d)	90571008	90590286	19278	0.642702	0.0798524	0.035791	aperiodic
3	dhor_3_2(S01C3/6H1d)	90590286	90804701	214415	1.22435	0.0824283	0.0382961	periodic
3	hor_3_1(S01C3H2)	90804701	91480350	675649	0.115807	0.0824283	0.0343735	periodic
3	dhor_3_3(S01CMH1d)	91711537	91735120	23583	0.855277	0.0824283	0.0348319	periodic
3	dhor_3_4(S1CMH3d)	91735120	91738002	2882	0.0902151	0.0850042	0.039855	periodic
3	hor_3_2(S01/1C3H1L)	91738002	92595822	857820	0.649802	0.0824283	0.0319962	periodic
3	hsat1_3_1(HSat1A)	92595822	92869462	273640	0	0.118491	0.0831052	periodic
3	hor_3_3(S01/1C3H1L)	92869462	92903106	33644	0.614879	0.0824283	0.0323639	periodic
3	hsat1_3_2(HSat1A)	92903106	95366303	2463197	0.000322345	0.118491	0.0841227	periodic
3	bsat_3_1(LSAU-BSAT_Composite)	95366303	95392308	26005	0.0362238	0.0824283	0.0345745	periodic
3	hsat3_3_1(A4)	95392308	95544065	151757	0.230975	0.0875801	0.0266394	aperiodic
3	censat_3_1(CER)	95655243	95656667	1424	10.2774	0.0901559	0.0250458	aperiodic
3	hsat5_3_1(HSat5)	95656667	95657915	1248	3.72356	0.103035	0.0288038	aperiodic
3	hsat5_3_2(HSat5)	95661511	95662879	1368	0.601608	0.100459	0.0278187	aperiodic
3	censat_3_2(SATR)	95716208	95718346	2138	9.32975	0.0927318	0.0268075	aperiodic
3	censat_3_3(SATR)	95721267	95725109	3842	0.292816	0.0901559	0.0260758	aperiodic
3	gsat_3_1(GSATII)	95750269	95753522	3253	19.8832	0.100459	0.0307751	periodic
3	censat_3_4(ACRO_Composite)	95753522	95863469	109947	0.865717	0.0927318	0.0489822	periodic
3	hor_3_4(S01/1C3H1L)	95863469	96415026	551557	0.508007	0.0824283	0.0326623	periodic
3	dhor_3_5(S01CMH1d)	96415026	96423364	8338	0.454306	0.0798524	0.0377774	aperiodic
3	mon_3_2	96423364	96498140	74776	6.09662	0.0901559	0.0277994	aperiodic
4	mon_4_1	49050159	49057864	7705	1.66204	0.0927318	0.0347777	periodic
4	hsat3_4_1(B3)	49057864	49115450	57586	0.111885	0.0824283	0.0326119	periodic
4	censat_4_1(CER)	49155675	49159000	3325	10.8198	0.04379	0.025089	aperiodic
4	hsat5_4_1(HSat5)	49159000	49160250	1250	3.8784	0.105611	0.0279358	aperiodic
4	hsat5_4_2(HSat5)	49171867	49173971	2104	0.362643	0.103035	0.0291486	periodic
4	hsat5_4_3(HSat5)	49194113	49195479	1366	0.197657	0.100459	0.0267929	aperiodic
4	censat_4_2(SATR)	49205774	49209483	3709	0.329469	0.0875801	0.0251117	aperiodic
4	gsat_4_1(GSATII/TAR)	49233320	49237430	4110	18.5467	0.0978836	0.030686	periodic
4	censat_4_3(ACRO_Composite)	49237430	49290905	53475	2.18392	0.0927318	0.0471972	periodic
4	gsat_4_2(GSATII/TAR)	49290905	49294583	3678	22.0087	0.0978836	0.0305069	periodic
4	censat_4_4(SATR)	49318851	49322560	3709	0.100027	0.0875801	0.0258111	aperiodic
4	censat_4_5(SATR)	49325506	49327634	2128	11.7049	0.0927318	0.0272904	aperiodic
4	hsat5_4_4(HSat5)	49380739	49382104	1365	2.18974	0.100459	0.0284776	aperiodic
4	hsat5_4_5(HSat5)	49399243	49401356	2113	0.809749	0.0772765	0.0281095	aperiodic
4	hsat5_4_6(HSat5)	49413839	49415059	1220	1.24672	0.105611	0.0301598	periodic
4	censat_4_6(CER)	49415064	49418975	3911	0.708003	0.04379	0.0273398	aperiodic
4	hsat3_4_2(A4,A2)	49529314	49646622	117308	0.262991	0.0850042	0.0259111	aperiodic
4	bsat_4_1	49646622	49647316	694	0	0.100459	0.0383486	periodic
4	hsat1_4_1(HSat1A)	49647316	49705154	57838	0.000691587	0.118491	0.0725471	periodic
4	hor_4_1(S2C4H1L)	49705154	50433557	728403	0.0992459	0.113339	0.0337715	periodic
4	hsat1_4_2(HSat1A)	50433557	52115486	1681929	0.00110171	0.118491	0.0796974	periodic
4	hor_4_2(S2C4H1L)	52115486	54870510	2755024	0.0972365	0.113339	0.0340101	periodic
4	hsat1_4_3(HSat1A)	54870510	54980290	109780	0	0.118491	0.0779549	periodic
4	hor_4_3(S2C4H1L)	54980290	55199795	219505	1.64543	0.113339	0.0335852	periodic
4	hor_4_4(S5C4H2)	55199795	55303192	103397	0.187781	0.0901559	0.0321766	periodic
4	mon_4_2	55305874	55308679	2805	0.168627	0.0927318	0.0423018	periodic
4	mon_4_3	57435218	57435402	184	0	0.0901559	0.0394886	periodic
5	mon_5_1	46161727	46684449	522722	2.35254	0.0927318	0.0295822	periodic
5	hor_5_1(S5C5/19H5)	46684449	46751595	67146	0.189602	0.0953077	0.0333992	periodic
5	hor_5_2(S5C5H6)	46751595	46752951	1356	0.273599	0.0927318	0.0326947	periodic
5	mon_5_2	46752951	46812529	59578	1.71166	0.0901559	0.0290931	periodic
5	dhor_5_1(S1CMH3d)	46812529	46830042	17513	0.00942157	0.0850042	0.0344509	periodic
5	hor_5_3(S1C5H2)	46830042	47039134	209092	0.00896256	0.0850042	0.0369607	periodic
5	hor_5_4(S1C1/5/19H1L)	47039134	47049663	10529	0.0897521	0.0875801	0.0310586	periodic
5	hor_5_5(S1C5H2)	47049663	47077202	27539	0.00994953	0.0850042	0.0371909	periodic
5	hor_5_6(S1C1/5/19H1L)	47077202	49596625	2519423	0.0752335	0.0875801	0.0321904	periodic
5	bsat_5_1	49596625	49598269	1644	0	0.0875801	0.0360529	periodic
5	hsat3_5_1(B3)	49598269	49999058	400789	0.0767012	0.0901559	0.0269534	aperiodic
5	bsat_5_2(LSAU-BSAT_Composite)	49999058	50026895	27837	0.0483529	0.0901559	0.0363845	periodic
5	mon_5_3	50026895	50121284	94389	2.77689	0.0927318	0.028109	aperiodic
5	hor_5_7(S5C5H6)	50121284	50449725	328441	0.0702105	0.0927318	0.0337137	periodic
5	mon_5_4	50455749	50467777	12028	0.0889591	0.0927318	0.0344723	periodic
5	dhor_5_2(S02CMH2d)	50467777	50474605	6828	3.83905	0.0824283	0.0328025	periodic
5	dhor_5_3(SF3)	50474605	50476981	2376	0.949916	0.0927318	0.0349942	periodic
5	dhor_5_4(S02CMH2d)	50476981	50486367	9386	2.85915	0.0824283	0.0320868	periodic
5	mon_5_5	50486367	50532291	45924	1.23214	0.0927318	0.0348945	periodic
5	hor_5_8(S5C5/19H7-B)	50532291	50597029	64738	0.239056	0.0927318	0.0341436	periodic
5	mon_5_6	50597029	50600088	3059	0.232756	0.0953077	0.0322516	periodic
5	dhor_5_5(S5C5/19H9d)	50600088	50627991	27903	5.47697	0.0824283	0.0342415	periodic
5	mon_5_7	50627991	50664972	36981	6.8927	0.0824283	0.0307319	periodic
5	hor_5_9(S5C5/19H4-B)	50664972	50962194	297222	0.559898	0.0901559	0.0287112	aperiodic
5	mon_5_8	50968285	51082874	114589	3.8971	0.0901559	0.0288781	aperiodic
6	mon_6_1	57216843	57217093	250	4.072	0.113339	0.0407783	periodic
6	censat_6_1(SATR)	58079100	58104742	25642	1.86081	0.0824283	0.0228468	aperiodic
6	mon_6_2	58243294	58286706	43412	2.46616	0.0901559	0.0286911	aperiodic
6	hor_6_1(S01C6H1L)	58286706	61058390	2771684	0.0169731	0.0824283	0.0324342	periodic
6	dhor_6_1(S01C3/6H1d)	61058390	61413505	355115	2.62168	0.0824283	0.0377492	periodic
6	mon_6_3	61451010	61451319	309	3.30744	0.113339	0.0342794	periodic
6	censat_6_2(SATR)	62162096	62211469	49373	2.55054	0.0901559	0.024238	aperiodic
6	mon_6_4	62446529	62514935	68406	4.33713	0.0901559	0.0285979	aperiodic
6	dhor_6_2(S01CMH1d)	62514935	62576462	61527	0.114405	0.0824283	0.0361857	periodic
6	mon_6_5	62576462	62665581	89119	0.701893	0.0901559	0.0285409	aperiodic
7	censat_7_1(NovelTandem)	55900922	55908176	7254	0.487317	0.0901559	0.0329478	periodic
7	censat_7_2(NovelTandem)	56524205	56610877	86672	0.346283	0.0721248	0.0347586	aperiodic
7	bsat_7_1	56837850	56844478	6628	0	0.0850042	0.0276215	aperiodic
7	bsat_7_2	56885066	56896173	11107	1.88314	0.100459	0.0289952	aperiodic
7	censat_7_3(NovelTandem)	57035476	57070032	34556	0.366564	0.066973	0.0307743	aperiodic
7	bsat_7_3	57380900	57385900	5000	0	0.103035	0.0309406	periodic
7	censat_7_4(NovelTandem)	57424468	57426315	1847	3.93232	0.0953077	0.0229791	aperiodic
7	censat_7_5(D20S16)	57459471	57465066	5595	0.0766756	0.105611	0.0303635	periodic
7	censat_7_6(SST1)	57728534	57728920	386	3.34974	0.0901559	0.0327107	periodic
7	hsat3_7_1(A4)	57729503	57730254	751	0.183755	0.118491	0.0325099	periodic
7	hsat2_7_1(B)	57730254	57731003	749	0.164219	0.303954	0.0458761	aperiodic
7	hsat3_7_2(A4)	57731003	57732006	1003	0.258225	0.0850042	0.0272654	aperiodic
7	hsat2_7_2(B)	57732006	57733003	997	1.02106	0.113339	0.0333184	periodic
7	hsat3_7_3(A4)	57733003	57734007	1004	0.454183	0.113339	0.0243314	aperiodic
7	hsat2_7_3(B)	57734007	57736003	1996	0.188377	0.303954	0.0461743	aperiodic
7	hsat3_7_4(A4)	57736003	57737003	1000	0.31	0.118491	0.0284927	aperiodic
7	hsat2_7_4(B)	57737003	57738007	1004	0.280876	0.30653	0.0734461	aperiodic
7	hsat3_7_5(A4)	57738007	57741655	3648	0.731086	0.113339	0.0282518	aperiodic
7	mon_7_1	57996168	58004894	8726	1.17454	0.0927318	0.0348347	periodic
7	censat_7_7(SST1_Composite)	58004894	58009200	4306	0.115885	0.105611	0.0315068	periodic
7	mon_7_2	58009200	58013074	3874	0.0296851	0.0953077	0.0324039	periodic
7	censat_7_8(SST1_Composite)	58013074	58022004	8930	1.46573	0.103035	0.0289507	aperiodic
7	censat_7_9(SST1_Composite)	58062065	58068162	6097	1.14811	0.0978836	0.028484	aperiodic
7	censat_7_10(rnd-1_family-0)	58081410	58084542	3132	0.334291	0.105611	0.0609432	periodic
7	censat_7_11(rnd-6_family-4384)	58112421	58113868	1447	0.871458	0.0927318	0.0470393	periodic
7	mon_7_3	58123902	58267147	143245	2.94746	0.0901559	0.0281563	aperiodic
7	dhor_7_1(S5C1H5d)	58267147	58272940	5793	0.220956	0.0927318	0.0301225	periodic
7	dhor_7_2(S2CMH4d)	58272940	58276138	3198	0.167292	0.0850042	0.0321416	periodic
7	hsat2_7_5(B)	58276138	58311534	35396	0.00536784	0.303954	0.0565392	aperiodic
7	censat_7_12(rnd-6_family-4384)	58328698	58331512	2814	1.36212	0.0927318	0.0392967	periodic
7	hsat2_7_6(B)	58348140	58363003	14863	0	0.303954	0.0558371	aperiodic
7	hsat3_7_6(B3,A1)	58363003	58567598	204595	0.0462621	0.0953077	0.0266802	aperiodic
7	censat_7_13(rnd-6_family-4384)	58582813	58585318	2505	1.54411	0.0515177	0.0501419	aperiodic
7	censat_7_14(rnd-6_family-4384)	58623017	58624388	1371	3.1167	0.0515177	0.0502982	aperiodic
7	censat_7_15(rnd-6_family-4384)	58659281	58662419	3138	8.35468	0.0953077	0.0337672	periodic
7	hsat2_7_7(B)	58679328	58706013	26685	0.00704516	0.303954	0.0585035	aperiodic
7	hsat3_7_7(B3)	58706013	58757551	51538	0.149152	0.0875801	0.0288183	aperiodic
7	hsat3_7_8(B3,A2)	58757551	58817019	59468	0.0273929	0.0901559	0.0268322	aperiodic
7	hsat2_7_8(B)	58817019	58830584	13565	0	0.118491	0.0495707	periodic
7	censat_7_16(rnd-6_family-4384)	58846986	58849451	2465	0.774442	0.0927318	0.0317935	periodic
7	censat_7_17(rnd-6_family-4384)	58903415	58905880	2465	0.348073	0.0927318	0.0325303	periodic
7	hsat2_7_9(B)	58922280	58936009	13729	0.00830359	0.303954	0.0500876	aperiodic
7	hsat3_7_9(B3,A2)	58936009	58995543	59534	0.23133	0.0875801	0.0270283	aperiodic
7	hsat3_7_10(B3)	58995543	59053255	57712	0.0968429	0.0875801	0.0287977	aperiodic
7	hsat2_7_10(B)	59053255	59079941	26686	0.012366	0.118491	0.059135	periodic
7	censat_7_18(rnd-6_family-4384)	59096852	59099991	3139	6.08092	0.0927318	0.036555	periodic
7	censat_7_19(rnd-6_family-4384)	59134896	59136267	1371	1.61634	0.0515177	0.0493636	aperiodic
7	hsat2_7_11(B)	59164521	59165541	1020	0	0.303954	0.0509149	aperiodic
7	hsat3_7_11(Unknown)	59165541	59166997	1456	0.508242	0.118491	0.0434374	periodic
7	hsat2_7_12(B)	59166997	59172178	5181	0.0115808	0.303954	0.0601474	aperiodic
7	hsat2_7_13(B)	59200132	59239997	39865	0.00240813	0.118491	0.056175	periodic
7	hsat3_7_12(Unknown)	59239997	59240691	694	0.221902	0.303954	0.0425382	aperiodic
7	hsat2_7_14(B)	59240691	59242825	2134	0	0.118491	0.0454566	periodic
7	censat_7_20(rnd-6_family-4384)	59262993	59269000	6007	2.87032	0.0901559	0.0338584	periodic
7	hsat2_7_15(B)	59285737	59305753	20016	0.00899281	0.303954	0.0580731	aperiodic
7	hsat2_7_16(B)	59332271	59355975	23704	0.012192	0.303954	0.0591263	aperiodic
7	censat_7_21(rnd-6_family-4384)	59372014	59374580	2566	1.11302	0.0927318	0.0367846	periodic
7	mon_7_4	59398555	59610435	211880	2.00125	0.0901559	0.0292332	periodic
7	hor_7_1(S5C7H2)	59612912	59816928	204016	0.474154	0.0824283	0.0279474	aperiodic
7	mon_7_5	59816928	59828427	11499	3.94417	0.0927318	0.0321668	periodic
7	dhor_7_3(S02CMH2d)	59828427	59833371	4944	3.76638	0.0901559	0.0335736	periodic
7	dhor_7_4(S2CMH4d)	59833371	59834354	983	1.84944	0.0824283	0.0377494	periodic
7	hsat2_7_17(B)	59857463	59913529	56066	0.0030143	0.118491	0.0571956	periodic
7	censat_7_22(rnd-6_family-4384)	59940284	59941196	912	4.4057	0.0515177	0.0474355	aperiodic
7	censat_7_23(rnd-6_family-4384)	59975939	59978660	2721	1.14627	0.0927318	0.0411988	periodic
7	hsat2_7_18(B)	59994276	60023596	29320	0.0126535	0.303954	0.0579823	aperiodic
7	mon_7_6	60041899	60410644	368745	2.40125	0.0901559	0.030238	periodic
7	dhor_7_5(S1CMH3d)	60410644	60414372	3728	0.00536481	0.0850042	0.0321246	periodic
7	hor_7_2(S1C7H1L)	60414372	63714499	3300127	0.00767637	0.0824283	0.0306055	periodic
7	dhor_7_6(S01CMH1d)	63714499	63724523	10024	0.0694334	0.0824283	0.0355466	periodic
7	dhor_7_7(S5C1H5d)	63724523	63729466	4943	0.326725	0.0901559	0.0291671	periodic
7	mon_7_7	63729466	64188435	458969	2.50676	0.0927318	0.0297743	periodic
7	censat_7_24(NovelTandem)	64944661	64983133	38472	4.30903	0.066973	0.0290782	aperiodic
7	bsat_7_4	65232468	65239767	7299	1.59625	0.103035	0.030004	periodic
7	bsat_7_5	65433709	65440849	7140	4.13754	0.0798524	0.0283778	aperiodic
7	bsat_7_6	65446687	65451678	4991	0.00400721	0.100459	0.0317557	periodic
7	bsat_7_7	65489525	65509466	19941	4.12176	0.0824283	0.0273922	aperiodic
7	bsat_7_8	65576080	65592231	16151	4.04402	0.0772765	0.0278044	aperiodic
7	mon_7_8	65600065	65607451	7386	2.73599	0.0824283	0.0352846	periodic
7	bsat_7_9	65607451	65609606	2155	0	0.0901559	0.0306639	periodic
7	bsat_7_10	65806253	65867365	61112	7.66586	0.0953077	0.0273991	aperiodic
7	censat_7_25(SST1_Composite)	66074162	66091336	17174	0.0863515	0.105611	0.0294289	periodic
7	mon_7_9	66697029	66699515	2486	0.21601	0.0927318	0.038235	periodic
7	hsat2_7_19(B)	66699515	66708003	8488	0.0999057	0.118491	0.0686427	periodic
7	hsat3_7_13(Unknown)	66708003	66709007	1004	38.5179	0.103035	0.0234896	aperiodic
8	hsat1_8_1(HSat1A)	43506737	43516671	9934	0.0042279	0.118491	0.071235	periodic
8	hsat5_8_1(HSat5)	43785457	43786545	1088	1.22702	0.126218	0.0297852	periodic
8	hsat5_8_2(HSat5)	43808924	43815721	6797	14.2842	0.100459	0.0308835	periodic
8	gsat_8_1(GSATX;GSATII)	43818992	43825494	6502	0.00968933	0.0978836	0.0460703	periodic
8	gsat_8_2(GSATX;GSATII)	43835447	43846456	11009	0.473976	0.0978836	0.0494467	periodic
8	mon_8_1	43846456	44214155	367699	1.754	0.0927318	0.0359156	periodic
8	dhor_8_1(S01CMH1d)	44214155	44215832	1677	7.63387	0.0850042	0.0362112	periodic
8	hor_8_1(S2C8H1L)	44215832	44217695	1863	0.0515298	0.0901559	0.0306794	periodic
8	dhor_8_2(S01CMH1d)	44217695	44243546	25851	2.1709	0.0798524	0.0353918	aperiodic
8	hor_8_2(S2C8H1L)	44243546	46325080	2081534	0.0621176	0.115915	0.028009	aperiodic
8	dhor_8_3(S01CMH1d)	46325080	46350589	25509	2.23533	0.0798524	0.0360446	aperiodic
8	mon_8_2	46350589	46389509	38920	2.90514	0.0927318	0.030123	periodic
8	gsat_8_3(GSATX;GSATII)	46389509	46406289	16780	1.73349	0.100459	0.0406691	periodic
8	mon_8_3	46423659	46466919	43260	1.08137	0.0927318	0.0353335	periodic
8	gsat_8_4(GSAT)	46466919	46468201	1282	0	0.0927318	0.0360783	periodic
8	mon_8_4	46468201	46469129	928	0.233836	0.0953077	0.0366793	periodic
8	gsat_8_5(GSAT)	46469129	46473674	4545	0.0312431	0.0953077	0.0391495	periodic
8	mon_8_5	46473674	46475518	1844	0.214751	0.0927318	0.0413427	periodic
8	gsat_8_6(GSAT)	46475518	46531195	55677	0.0647305	0.0953077	0.0435853	periodic
8	mon_8_6	46531195	46551285	20090	0.0317571	0.0927318	0.0335274	periodic
8	gsat_8_7(GSAT)	46551285	46642146	90861	0.237054	0.0953077	0.0434236	periodic
8	gsat_8_8(GSAT)	46650160	46656000	5840	0.0205479	0.0953077	0.0413736	periodic
8	gsat_8_9(GSAT)	46663188	46665934	2746	0	0.0953077	0.0390864	periodic
8	mon_8_7	46665934	46668845	2911	0.0666438	0.0927318	0.0410036	periodic
8	gsat_8_10(GSAT)	46668845	46669235	390	0	0.0953077	0.0474271	periodic
8	mon_8_8	46669235	46703931	34696	1.13036	0.0927318	0.0354186	periodic
8	gsat_8_11(GSAT)	46704295	46722257	17962	2.25704	0.0978836	0.0421327	periodic
8	mon_8_9	46722257	46751419	29162	1.88574	0.0927318	0.0347391	periodic
8	gsat_8_12(GSAT)	46751419	46769937	18518	0.0116643	0.0953077	0.0453381	periodic
8	mon_8_10	46769937	46779244	9307	0.0269689	0.0927318	0.0352698	periodic
8	gsat_8_13(GSAT)	46779244	46827220	47976	2.1447	0.0978836	0.0430742	periodic
8	mon_8_11	46827220	46920436	93216	0.92571	0.0927318	0.0376639	periodic
8	bsat_8_1	47010177	47027325	17148	0.822312	0.0798524	0.0280655	aperiodic
8	bsat_8_2	47153542	47157489	3947	1.42336	0.0798524	0.0266476	aperiodic
8	bsat_8_3	47189719	47202994	13275	0.0616196	0.0798524	0.0286775	aperiodic
8	bsat_8_4	47215034	47240294	25260	0.450594	0.0850042	0.0286676	aperiodic
8	bsat_8_5	47257084	47269175	12091	0	0.0850042	0.0275822	aperiodic
8	bsat_8_6	47378771	47379607	836	0	0.105611	0.0267548	aperiodic
8	censat_8_1(ACRO_composite)	48460321	48466602	6281	13.282	0.0953077	0.0377609	periodic
9	censat_9_1(SST1_Composite)	40119875	40121764	1889	100.055	0.0978836	0.0278529	aperiodic
9	gsat_9_1(GSATII,TAR)	40121764	40127692	5928	80.2988	0.0978836	0.0287352	aperiodic
9	censat_9_2(rnd-1_family-0)	40127692	40135523	7831	13.759	0.105611	0.0562851	periodic
9	hsat5_9_1(HSat5)	40305572	40306924	1352	0.85503	0.105611	0.0283378	aperiodic
9	hsat5_9_2(HSat5)	40336426	40342038	5612	1.01604	0.100459	0.0302081	periodic
9	censat_9_3(CER)	40539564	40539667	103	3.75728	0.0901559	0.0228603	aperiodic
9	mon_9_1	40539667	40552955	13288	3.82962	0.0927318	0.027382	aperiodic
9	censat_9_4(ATGAAn)	40573469	40581494	8025	114.761	0.0901559	0.0319451	periodic
9	censat_9_5(rnd-6_family-4384)	40628581	40629900	1319	16.5004	0.0515177	0.0377612	aperiodic
9	bsat_9_1(LSAU-BSAT_Composite,no_beta)	40759844	40762034	2190	10.0023	0.108187	0.0348912	periodic
9	censat_9_6(rnd-6_family-13719,20)	40762034	40765269	3235	5.51839	0.0798524	0.0274532	aperiodic
9	censat_9_7(SST1_Composite)	41592381	41594116	1735	0.192507	0.103035	0.029959	periodic
9	censat_9_8(SST1_Composite)	41642076	41651174	9098	6.86568	0.100459	0.029236	periodic
9	censat_9_9(SST1_Composite)	41934694	41936580	1886	93.5615	0.0953077	0.0290726	periodic
9	gsat_9_2(GSATII,TAR)	41936580	41942496	5916	80.8668	0.100459	0.0290194	periodic
9	censat_9_10(rnd-1_family-0)	41942496	41951669	9173	12.6571	0.105611	0.0578103	periodic
9	censat_9_11(rnd-6_family-13719,20)	42056641	42059897	3256	10.0064	0.0798524	0.0278713	aperiodic
9	bsat_9_2(LSAU-BSAT_Composite,no_beta)	42059897	42062088	2191	4.14742	0.105611	0.0343808	periodic
9	censat_9_12(SATR)	42175804	42190907	15103	4.8256	0.0824283	0.025807	aperiodic
9	censat_9_13(CER)	42363429	42390397	26968	8.13716	0.0927318	0.0259852	aperiodic
9	mon_9_2	42390397	42408618	18221	4.36211	0.0927318	0.0278115	aperiodic
9	dhor_9_1(SF2,SF02)	42411678	42444217	32539	6.68416	0.0875801	0.0325015	periodic
9	mon_9_3	42444217	42483246	39029	4.89008	0.0901559	0.0279431	aperiodic
9	censat_9_14(CER)	42483246	42483349	103	26.6796	0.0489418	0.0305443	aperiodic
9	censat_9_15(CER)	42612328	42616459	4131	1.74728	0.118491	0.0290101	periodic
9	censat_9_16(rnd-6_family-4384)	42646395	42648005	1610	2.72422	0.0515177	0.0417559	aperiodic
9	censat_9_17(CATCTn)	42695084	42700393	5309	0.355057	0.0875801	0.0367536	periodic
9	dhor_9_2(SF2,SF02)	42723519	42726231	2712	21.2537	0.0875801	0.0308653	periodic
9	mon_9_4	42726231	42757727	31496	11.5978	0.0901559	0.0286228	aperiodic
9	censat_9_18(CER)	42757727	42757830	103	26.8932	0.0463659	0.0293035	aperiodic
9	hsat5_9_3(HSat5)	42955467	42961085	5618	0.246351	0.100459	0.0296389	periodic
9	hsat5_9_4(HSat5)	42990598	42991952	1354	0.0310192	0.103035	0.0261127	aperiodic
9	censat_9_19(SST1_Composite)	43193890	43199183	5293	4.96448	0.0978836	0.0285272	aperiodic
9	censat_9_20(SST1_Composite)	43249506	43251239	1733	1.43566	0.103035	0.0317743	periodic
9	hsat5_9_5(HSat5)	44473333	44474692	1359	1.24945	0.105611	0.0282824	aperiodic
9	hsat5_9_6(HSat5)	44498993	44504623	5630	0.765719	0.103035	0.0298505	periodic
9	censat_9_21(CER)	44705245	44705367	122	4.2623	0.0772765	0.0221487	aperiodic
9	mon_9_5	44705367	44773761	68394	1.07078	0.0927318	0.0279411	aperiodic
9	dhor_9_3(S2CMH4d)	44773761	44775912	2151	0.480707	0.0850042	0.0375393	periodic
9	censat_9_22(CCCTGGn,ATGAAn)	44799160	44812876	13716	112.467	0.0901559	0.0318243	periodic
9	censat_9_23(rnd-6_family-4384)	44864060	44865067	1007	7.27507	0.0515177	0.0451046	aperiodic
9	censat_9_24(rnd-6_family-4384)	44892269	44895482	3213	0.582633	0.0540936	0.0367545	aperiodic
9	hsat2_9_1(B)	44899868	44938599	38731	0.0170148	0.118491	0.0612416	periodic
9	dhor_9_4(SF2,SF02)	44938599	44951775	13176	0.13221	0.0875801	0.0313828	periodic
9	hor_9_1(S2C9H1L)	44951775	47582595	2630820	0.19224	0.113339	0.0337848	periodic
9	dhor_9_5(SF2,SF02)	47582595	47589745	7150	0.191748	0.0927318	0.0308539	periodic
9	mon_9_6	47589745	47609560	19815	2.9194	0.0927318	0.0271435	aperiodic
9	censat_9_25(CER)	47609560	47638225	28665	4.01388	0.0927318	0.0254713	aperiodic
9	bsat_9_3(LSAU-BSAT_Composite,no_beta)	47737183	47739396	2213	9.047	0.108187	0.0334388	periodic
9	censat_9_26(rnd-6_family-13719,20)	47739396	47742620	3224	6.134	0.0798524	0.028749	aperiodic
9	censat_9_27(rnd-1_family-0)	47841420	47849270	7850	0.0405096	0.105611	0.055539	periodic
9	gsat_9_3(GSATII,TAR)	47849270	47855257	5987	3.6474	0.100459	0.0299661	periodic
9	censat_9_28(SST1_Composite)	47855257	47857072	1815	76.243	0.103035	0.0284709	aperiodic
9	censat_9_29(SST1_Composite)	48141209	48150354	9145	5.49863	0.103035	0.0288094	aperiodic
9	censat_9_30(SST1_Composite)	48303506	48305237	1731	0.192952	0.103035	0.0293843	periodic
9	censat_9_31(SST1_Composite)	48354751	48364967	10216	3.50245	0.100459	0.0293749	periodic
9	mon_9_7	48364967	48368871	3904	0.239498	0.0953077	0.0306233	periodic
9	censat_9_32(SST1_Composite)	48368871	48373153	4282	0.0481084	0.103035	0.0296258	periodic
9	mon_9_8	48373153	48383622	10469	1.47626	0.0927318	0.0346472	periodic
9	hsat3_9_1(B3)	48476973	48557068	80095	0.14976	0.0798524	0.0264284	aperiodic
9	bsat_9_4	48557068	48569040	11972	0.0376712	0.0901559	0.036022	periodic
9	hsat3_9_2(B3)	48569040	48813973	244933	0.11319	0.0824283	0.0272444	aperiodic
9	bsat_9_5	48813973	49055551	241578	0.0113918	0.0901559	0.038496	periodic
9	hsat3_9_3(B5)	49055551	76694047	27638496	0.0934774	0.105611	0.0277266	aperiodic
9	censat_9_33(CER)	76804204	76808727	4523	10.0986	0.04379	0.0276728	aperiodic
9	hsat5_9_7(HSat5)	76808727	76809962	1235	3.89636	0.108187	0.0294021	periodic
9	hsat5_9_8(HSat5)	76823087	76825316	2229	0.495289	0.103035	0.0290517	periodic
9	hsat5_9_9(HSat5)	76845482	76846837	1355	0.309963	0.110763	0.0265298	aperiodic
9	censat_9_34(SATR)	76939407	76941461	2054	14.4455	0.100459	0.0248369	aperiodic
9	censat_9_35(SATR)	76944375	76948224	3849	0.273318	0.0850042	0.0271782	aperiodic
9	gsat_9_4(TAR/GSATII)	76972369	76976225	3856	27.2518	0.103035	0.0320806	periodic
9	censat_9_36(rnd-1_family-0)	76976225	76977867	1642	14.2698	0.105611	0.0512646	periodic
9	censat_9_37(SATR)	77041361	77058678	17317	4.52555	0.0798524	0.0280604	aperiodic
9	censat_9_38(CER)	77232488	77240220	7732	4.00116	0.0953077	0.024872	aperiodic
9	censat_9_39(CER)	77247054	77257815	10761	3.67271	0.0927318	0.0247215	aperiodic
9	mon_9_9	77257815	77276265	18450	4.0768	0.0927318	0.0278581	aperiodic
9	dhor_9_6(S2CMH4d)	77279322	77282899	3577	3.11574	0.0875801	0.0324878	periodic
9	dhor_9_7(SF02)	77289240	77319551	30311	2.99155	0.0850042	0.0332516	periodic
9	mon_9_10	77319551	77347987	28436	3.57061	0.0875801	0.028693	aperiodic
9	censat_9_40(CER)	77347987	77348106	119	25.6891	0.0824283	0.0280501	aperiodic
9	censat_9_41(CER)	77476784	77481008	4224	1.67614	0.118491	0.0287036	aperiodic
9	censat_9_42(rnd-6_family-4384)	77510924	77513280	2356	1.68294	0.0798524	0.0403758	aperiodic
9	censat_9_43(CATCTn)	77560408	77569867	9459	0.453219	0.0850042	0.0347682	periodic
9	dhor_9_8(SF2,SF02)	77599464	77602175	2711	21.9605	0.0875801	0.0304044	periodic
9	mon_9_11	77602175	77605217	3042	18.7676	0.0901559	0.0272784	aperiodic
9	censat_9_44(CER)	77605217	77605320	103	27.2718	0.13137	0.0305134	periodic
9	hsat5_9_10(HSat5)	77804649	77805738	1089	0.0918274	0.0695489	0.0363413	aperiodic
9	hsat5_9_11(HSat5)	77854633	77855225	592	0	0.13137	0.0300713	periodic
9	censat_9_45(rnd-1_family-0)	78025024	78032850	7826	0.0504728	0.105611	0.0535684	periodic
9	gsat_9_5(GSATII)	78032850	78038666	5816	2.93054	0.100459	0.0298419	periodic
9	censat_9_46(SST1_Composite)	78038666	78040719	2053	77.6805	0.100459	0.0271994	aperiodic
9	censat_9_47(SST1_Composite)	79450913	79452644	1731	0.19353	0.105611	0.0292565	periodic
9	censat_9_48(SST1_Composite)	79500659	79509797	9138	7.04038	0.100459	0.0284741	aperiodic
9	hsat5_9_12(HSat5)	79709306	79710650	1344	1.15551	0.103035	0.0303707	periodic
9	hsat5_9_13(HSat5)	79740134	79746250	6116	0.953074	0.0747006	0.0296497	aperiodic
9	mon_9_12	79941019	79944043	3024	1.11806	0.0927318	0.0277343	aperiodic
9	dhor_9_9(SF2,SF02)	79944043	79946750	2707	0.143702	0.0875801	0.0303279	periodic
9	censat_9_49(TGGCCCn,A-rich)	79969508	79984161	14653	113.301	0.0927318	0.0297003	periodic
9	censat_9_50(rnd-6_family-4384)	80031273	80033619	2346	17.491	0.0515177	0.0389637	aperiodic
9	bsat_9_6(LSAU-BSAT_Composite,no_beta)	80163515	80165705	2190	9.9032	0.108187	0.0347307	periodic
9	censat_9_51(rnd-6_family-13719,20)	80165705	80168936	3231	5.5407	0.0798524	0.0280376	aperiodic
9	censat_9_52(rnd-6_family-13719,20)	80367431	80370664	3233	10.7164	0.0798524	0.0267848	aperiodic
9	bsat_9_7(LSAU-BSAT_Composite,no_beta)	80370664	80372855	2191	4.23323	0.105611	0.0358477	periodic
9	censat_9_53(SATR)	80485822	80500930	15108	4.80481	0.0824283	0.0262578	aperiodic
9	censat_9_54(SATR)	81268901	81269165	264	0.481061	0.0953077	0.0216947	aperiodic
X	mon_X_1	57362331	57379461	17130	3.40893	0.0798524	0.0299092	aperiodic
X	hsat4_X_1(HSat4)	57379461	57392493	13032	0.211249	0.0875801	0.057305	periodic
X	mon_X_2	57395182	57398313	3131	0.0945385	0.105611	0.0318624	periodic
X	hsat4_X_2(HSat4)	57398313	57446652	48339	3.95579	0.0875801	0.0490105	periodic
X	mon_X_3	57446652	57486467	39815	1.98018	0.0824283	0.0305127	periodic
X	hsat4_X_3(HSat4)	57486467	57517479	31012	1.54453	0.0875801	0.0523402	periodic
X	mon_X_4	57517479	57523462	5983	4.36353	0.0875801	0.0334619	periodic
X	hsat4_X_4(HSat4)	57523462	57554109	30647	1.79551	0.0875801	0.0523385	periodic
X	gsat_X_1(GSATX)	57554109	57593564	39455	0.0199214	0.0978836	0.0529396	periodic
X	mon_X_5	57593564	57817387	223823	1.7282	0.0901559	0.0304944	periodic
X	dhor_X_1(S01CMH1d)	57817387	57817895	508	0.669291	0.0798524	0.0405813	aperiodic
X	dhor_X_2(SF3)	57817895	57819763	1868	0.0572805	0.100459	0.0305776	periodic
X	hor_X_1(S3CXH1L)	57819763	60927195	3107432	0.155181	0.0875801	0.0315298	periodic
X	dhor_X_3(S01CMH1d)	60927195	60927707	512	0.0605469	0.0798524	0.037663	aperiodic
X	mon_X_6	60927707	61247454	319747	2.15673	0.0927318	0.0314169	periodic
